# Supplementary material
Source: PubMed Central journal article supplement (PMC8697475)

# **Enantioselective Total Synthesis of Macfarlandin C, a Spongian Diterpenoid Harboring a Concave-Substituted *cis*-Dioxabicyclo[3.3.0]octanone Fragment**

Tyler K. Allred, André P. Dieskau, Peng Zhao, Gregory L. Lackner, and Larry E. Overman\*

*Department of Chemistry, University of California, Irvine, California 92697-2025*

## **Supporting Information – Table of Contents**

|                                                                                                              |                |
|--------------------------------------------------------------------------------------------------------------|----------------|
| <b>Materials and Methods.....</b>                                                                            | <b>S2–S3</b>   |
| <b>Procedures for the Synthesis of Concave-Substituted <i>cis</i>-2,8-Dioxabicyclo[3.3.0]octanones .....</b> | <b>S4–S10</b>  |
| <b>Procedures for the Synthesis of Macfarlandin C.....</b>                                                   | <b>S11–S29</b> |
| <b>Comparison Table for Synthetic and Natural Macfarlandin C.....</b>                                        | <b>S30</b>     |
| <b>X-Ray Structure of Mukaiyama Hydration Product.....</b>                                                   | <b>S31–S32</b> |
| <b>Summary of Unsuccessful HAT Hydrogenation Conditions for the Conversion of S1 to S6/S7.....</b>           | <b>S33</b>     |
| <b>References.....</b>                                                                                       | <b>S34</b>     |
| <b>Spectral Data.....</b>                                                                                    | <b>S34–S79</b> |

## Materials and Methods:

Unless stated otherwise, reactions were conducted in oven-dried glassware under an atmosphere of argon. Tetrahydrofuran (THF), 1,2-dimethoxyethane (DME), dimethylformamide (DMF), toluene, dichloromethane ( $\text{CH}_2\text{Cl}_2$ ), methanol (MeOH) and triethylamine were dried by passage through activated alumina. Commercial solutions of ethyl glyoxylate were distilled over  $\text{P}_2\text{O}_5$  immediately prior to use. All other commercial reagents were used as received unless otherwise noted. Reaction temperatures were controlled using a temperature modulator, and unless stated otherwise, reactions were performed at rt (rt, approximately 23 °C). Thin-layer chromatography (TLC) was conducted with silica gel 60 F254 pre-coated plates, (0.25 mm) and visualized by exposure to UV light (254 nm) or by p-anisaldehyde, ceric ammonium molybdate, and potassium permanganate staining ( $\text{KMnO}_4$ ). Silica gel 60 (particle size 0.040–0.063 mm) was used for flash column chromatography.  $^1\text{H}$  NMR spectra were recorded at 500 or 600 MHz and are reported relative to deuterated solvent signals. Data for  $^1\text{H}$  NMR spectra are reported as follows: chemical shift ( $\delta$  ppm), multiplicity, coupling constant (Hz), and integration.  $^{13}\text{C}$  NMR spectra were recorded at 125 or 150 MHz. Data for  $^{13}\text{C}$  NMR spectra are reported in terms of chemical shift. IR spectra were recorded on a ThermoFisher Nicolet iS5 FT-IR spectrometer with an iD7 ATR accessory and are reported in terms of frequency of absorption ( $\text{cm}^{-1}$ ). High-resolution mass spectra were obtained from the UC Irvine Mass Spectrometry Facility with a Micromass LCT spectrometer. Optical rotation readings were obtained using JASCO P-1010 polarimeter. Kessil KSH150B LED Grow Light 150, Blue (34 W blue LED lamps) were purchased from <http://www.amazon.com>. Enantiomeric excess for compounds **22** and **26** were determined by HPLC analysis using an enantioselective column.

Abbreviations commonly used are: IPA (isopropyl alcohol), Hex (hexanes), DMAP (4-dimethylaminopyridine); For others, see: JOC Standard Abbreviations and Acronyms: [http://pubs.acs.org/paragonplus/submission/jocea/jocea\\_abbreviations.pdf](http://pubs.acs.org/paragonplus/submission/jocea/jocea_abbreviations.pdf).

## Experimental Procedures

### Preparation of the Concave-Substituted *cis*-2,8-Dioxabicyclo[3.3.0]octanone Model System

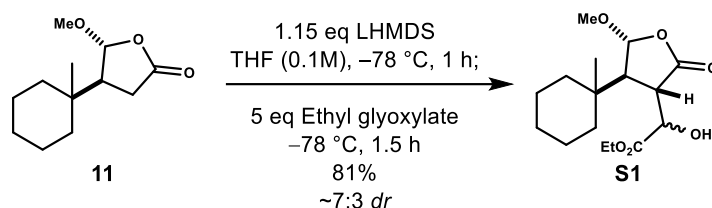

**Preparation of Alcohol S1:** A flame dried 250 mL round-bottom flask was charged with lactone **11**<sup>1,2</sup> (1.37 g, 6.44 mmol) and THF (64 mL, 0.1 M). The solution was cooled to  $-78\text{ }^{\circ}\text{C}$  and a solution of LHMDS (7.3 mL, 7.3 mmol, 1.15 eq, 1 M in THF) was added dropwise. The reaction was maintained at  $-78\text{ }^{\circ}\text{C}$  for 1 h. During the enolate formation, ethyl glyoxylate (50 wt% in toluene) was distilled over  $\text{P}_2\text{O}_5$  under argon (10–15 min at  $110\text{ }^{\circ}\text{C}$  then warm to  $140\text{ }^{\circ}\text{C}$  over 10 min then warm to  $200\text{ }^{\circ}\text{C}$ ); the yellow distillate was used immediately. Freshly distilled ethyl glyoxylate (6.4 mL, 32 mmol, 5 eq) was added, the reaction mixture was maintained at  $-78\text{ }^{\circ}\text{C}$  for 1.5 h, and then subsequently quenched by the addition of  $\text{H}_2\text{O}$  (50 mL) and allowed to warm to rt. The layers were separated and the aqueous layer was extracted with EtOAc (3 x 30 mL). The combined organic layers were then washed with brine (40 mL) and dried over  $\text{MgSO}_4$ . The organic layer was filtered and concentrated to an orange oil. The residue was purified by column chromatography ( $\text{SiO}_2$ , 20:1→4:1 Hex/EtOAc) to afford alcohol **S1** (1.64 g, 5.22 mmol, 81%) as a colorless oil and as a  $\sim 7:3$  mixture of alcohol epimers.  $R_f = 0.3$  (4:1 Hex/EtOAc, visualized with  $\text{KMnO}_4$ ).

**$^1\text{H}$  NMR** (600 MHz,  $\text{CDCl}_3$ ):  $\delta$  5.23 (d,  $J = 1.2$  Hz, 0.3H, minor), 5.17 (d,  $J = 3.0$  Hz, 0.7H, major), 4.66 (dd,  $J = 3.0, 8.9$ , 0.3H, minor), 4.39–4.25 (m, 2.4H, major and minor), 4.18–4.10 (m, 0.3H, minor), 3.52 (s, 0.9H, minor), 3.51 (s, 2.1H, major), 3.48–3.44 (m, 0.3H, minor), 3.25 (d,  $J = 4.1$  Hz, 0.7H, major), 3.08 (dd,  $J = 3.0, 6.5$  Hz, 0.7H, major), 3.07 (app t,  $J = 3.4$  Hz, 0.3H, minor), 2.40 (dd,  $J = 3.1, 6.2$  Hz, 0.7H, major), 2.15–2.11 (m, 0.3H, minor), 1.64–1.51 (m, 3H), 1.50–1.41 (m, 2H), 1.38–1.21 (m, 5H), 1.35 (t,  $J = 7.0$  Hz, 2.1H, major), 1.31 (t,  $J = 7.1$  Hz, 0.9H, minor), 0.93 (s, 2.1H, major), 0.84 (s, 0.9H, minor)

**$^{13}\text{C}$  NMR** (150 MHz,  $\text{CDCl}_3$ ):  $\delta$  (Major) 174.6, 172.4, 105.9, 70.5, 62.6, 57.2, 45.8, 35.6, 35.4, 34.4, 31.6, 25.9, 21.4, 21.3, 20.3, 14.0, (Minor) 176.1, 172.3, 105.3, 70.7, 62.0, 56.8, 45.4, 34.9, 34.6, 33.9, 29.7, 25.9, 21.37, 21.33, 19.5, 14.0

**IR** (thin film) 3475, 2927, 2852, 1773, 1737, 1446, 1371, 1263, 1220, 1184, 1121

**HRMS** (ESI) calculated for  $[\text{C}_{16}\text{H}_{26}\text{O}_6\text{Na}]^+$  ( $\text{M}+\text{Na}$ ) 337.1627, observed 337.1614

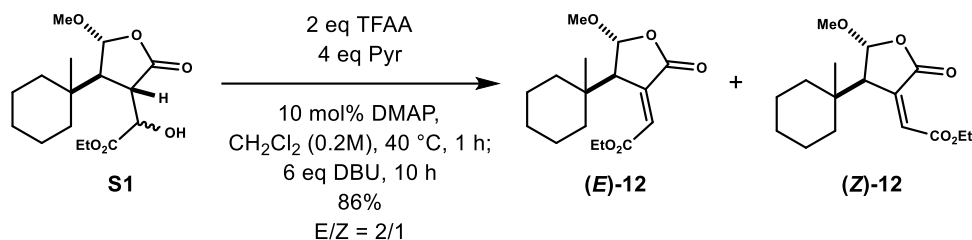

**Preparation of Alkenes 12:** A 100 mL round-bottom flask was charged with alcohol **S1** (1.63 g, 5.2 mmol), DMAP (63 mg, 0.52 mmol, 10 mol%), and  $\text{CH}_2\text{Cl}_2$  (25 mL, 0.2 M). After sequential addition of pyridine (1.67 mL, 20.8 mmol, 4 eq) and trifluoroacetic anhydride (1.4 mL, 10 mmol, 2 eq), the reaction mixture was maintained at 40 °C for 1 h when complete consumption of the starting material was observed by TLC analysis. The reaction was cooled to rt and DBU (4.6 mL, 31 mmol, 6 eq) was added via syringe. The mixture was stirred at rt for 1 h and then quenched by the addition of  $\text{H}_2\text{O}$  (20 mL). The layers were separated and the aqueous layer was washed with  $\text{CH}_2\text{Cl}_2$  (2 x 20 mL). The combined organic layers were then washed with brine (30 mL), dried over  $\text{MgSO}_4$ , filtered and concentrated under reduced pressure to a brown oil. This residue was purified by flash column chromatography ( $\text{SiO}_2$ , 20:1  $\rightarrow$  10:1 Hex/EtOAc) to afford (*E*)-**12** (865 mg, 2.91 mmol, 56%) and (*Z*)-**12** (459 mg, 1.56 mmol, 30%) as colorless oils.  $R_f = 0.60$  and 0.45 (4:1 Hex/EtOAc), respectively.

#### 12: (*E*)-Alkene

**$^1\text{H NMR}$**  (600 MHz,  $\text{CDCl}_3$ ):  $\delta$  6.90 (d,  $J = 1.6$  Hz, 1H), 5.39 (s, 1H), 4.31-4.19 (m, 2H), 3.51 (d,  $J = 1.6$  Hz, 1H), 3.48 (s, 3H), 1.66-1.59 (m, 1H), 1.56-1.50 (m, 2H), 1.49-1.35 (m, 3H), 1.32 (t,  $J = 7.1$  Hz, 3H), 1.29-1.18 (m, 3H), 1.15-1.06 (m, 1H), 0.94 (s, 3H)

**$^{13}\text{C NMR}$**  (150 MHz,  $\text{CDCl}_3$ ):  $\delta$  170.4, 165.2, 141.2, 127.9, 104.9, 61.2, 56.47, 55.7, 38.0, 35.0, 34.2, 25.8, 21.6, 21.5, 19.6, 14.1

**IR** (thin film) 2927, 2851, 1776, 1724, 1465, 1446, 1372, 1353, 1255, 1206, 1113, 1065, 1024, 999, 929, 786, 673

**HRMS** (ESI) calculated for  $[\text{C}_{16}\text{H}_{24}\text{NaO}_5]^+$  (M) 319.1521, observed 319.1533

#### 12: (*Z*)-Alkene

**$^1\text{H NMR}$**  (600 MHz,  $\text{CDCl}_3$ ):  $\delta$  6.27 (d,  $J = 1.6$  Hz, 1H), 5.27 (s, 1H), 4.31 (q,  $J = 7.2$  Hz, 2H), 3.48 (s, 3H), 2.69 (s, 1H), 1.60-1.37 (m, 8H), 1.34 (t,  $J = 7.2$  Hz, 3H), 1.31-1.22 (m, 2H), 0.87 (s, 3H)

**$^{13}\text{C NMR}$**  (150 MHz,  $\text{CDCl}_3$ ):  $\delta$  167.1, 165.1, 133.0, 130.6, 104.1, 61.7, 56.5, 55.5, 35.7, 35.2, 34.6, 25.9, 21.44, 21.40, 20.5, 14.0

**IR** (thin film) 2927, 2851, 1772, 1732, 1465, 1446, 1367, 1328, 1219, 1176, 1090, 1025, 942, 674

**HRMS** (ESI) calculated for  $[\text{C}_{16}\text{H}_{24}\text{NaO}_5]^+$  (M) 319.1521, observed 319.1533

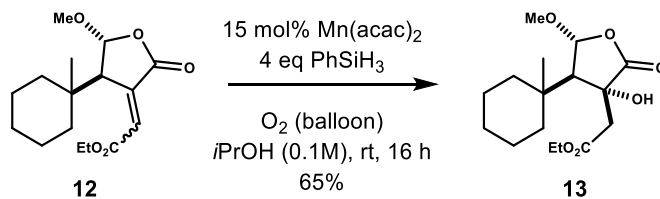

**Preparation of Alcohol 14:** A 25 mL round-bottom flask was charged with alkenes **12** (169 mg, 0.57 mmol) and *i*PrOH (6 mL, 0.1 M). The mixture was sparged with O<sub>2</sub> for 5 min. Then Mn(acac)<sub>2</sub> (23.5 mg, 0.092 mmol, 15 mol%) and PhSiH<sub>3</sub> (0.28 mL, 2.26 mmol, 4 eq) were added. The mixture was gently warmed with a heat gun until the reaction turned yellow in color and started to bubble. The reaction was then allowed to cool to rt and stirred at rt for 24 h. The reaction was then concentrated under reduced pressure and purified by flash column chromatography (SiO<sub>2</sub>, 10:1→4:1 Hex/EtOAc) to afford alcohol **13** (116 mg, 65%) as a colorless oil that solidifies over time. R<sub>f</sub> = 0.3 (9:1 Hex/EtOAc, visualized with KMnO<sub>4</sub>). X-ray quality crystals were obtained by slow evaporation from chloroform.

**<sup>1</sup>H NMR** (600 MHz, CDCl<sub>3</sub>): δ 5.31 (d, *J* = 7.3 Hz, 1H), 4.68 (s, 1H), 4.26-4.16 (m, 2H), 3.57 (s, 3H), 2.98 (d, *J* = 15.1 Hz, 1H), 2.68 (d, *J* = 15.0 Hz, 1H), 2.48 (d, *J* = 7.4 Hz, 1H), 1.70-1.64 (m, 1H), 1.63-1.57 (m, 1H), 1.55-1.48 (m, 2H), 1.48-1.38 (m, 5H), 1.32-1.24 (m, 1H), 1.28 (t, *J* = 7.1 Hz, 3H), 1.09 (s, 3H)

**<sup>13</sup>C NMR** (150 MHz, CDCl<sub>3</sub>): δ 175.1, 170.5, 104.4, 77.0, 61.7, 58.2, 57.5, 39.2, 38.2, 36.3, 34.4, 25.8, 22.3, 21.4, 21.3, 14.0

**IR** (thin film) 3448, 2930, 2854, 1782, 1735, 1448, 1392, 1373, 1298, 1216, 1175, 1135, 1044, 922

**HRMS** (ESI) calculated for [C<sub>16</sub>H<sub>27</sub>O<sub>6</sub>]<sup>+</sup> (M) 315.1808, observed 315.1811

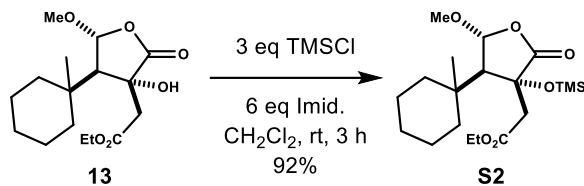

**Preparation of TMS-protected Alcohol S2:** A 10 mL round-bottom flask was charged with alcohol **13** (113 mg, 0.358 mmol) and  $\text{CH}_2\text{Cl}_2$  (3 mL, 0.1 M). Imidazole (148 mg, 2.17 mmol, 6 eq) was added, followed by freshly distilled TMSCl (0.14 mL, 1.1 mmol, 3 eq). The reaction was then stirred at rt for 3 h, at which time TLC analysis indicated consumption of starting material. The reaction was quenched by the addition of  $\text{H}_2\text{O}$  (5 mL). The layers were separated and the aqueous layer was extracted with  $\text{CH}_2\text{Cl}_2$  (3 x 5 mL). The organic layers were then dried over  $\text{MgSO}_4$ , filtered, and concentrated to afford lactone **S2** (127 mg, 92%) as a pale-yellow oil that was used without further purification.  $R_f = 0.66$  (4:1 Hex/EtOAc, visualized with  $\text{KMnO}_4$ ).

**$^1\text{H NMR}$**  (600 MHz,  $\text{C}_6\text{D}_6$ ):  $\delta$  5.32 (d,  $J = 7.7$  Hz, 1H), 3.93 (dq,  $J = 7.1, 11.0$  Hz, 1H), 3.79 (dq,  $J = 7.1, 11.0$  Hz, 1H), 3.13 (s, 3H), 3.10 (d,  $J = 16.4$  Hz, 1H), 2.93 (d,  $J = 16.4$  Hz, 1H), 2.58 (d,  $J = 7.7$  Hz, 1H), 1.67-1.58 (m, 1H), 1.55-1.43 (m, 3H), 1.43-1.30 (m, 4H), 1.30-1.25 (m, 1H), 1.24-1.14 (m, 1H), 0.93 (s, 3H), 0.91 (t,  $J = 7.1$  Hz, 3H), 0.33 (s, 9H)

**$^{13}\text{C NMR}$**  (150 MHz,  $\text{C}_6\text{D}_6$ ):  $\delta$  174.3, 169.0, 104.2, 79.7, 61.5, 60.4, 56.6, 42.9, 38.0, 36.5, 34.3, 25.9, 21.8, 21.6, 21.4, 13.6, 1.6

**IR** (thin film) 2925, 2850, 1780, 1739, 1373, 1339, 1248, 1132, 954, 844

**HRMS** (ESI) calculated for  $[\text{C}_{19}\text{H}_{34}\text{NaO}_6\text{Si}]^+$  (M)<sup>+</sup> 409.2022, observed 409.2013

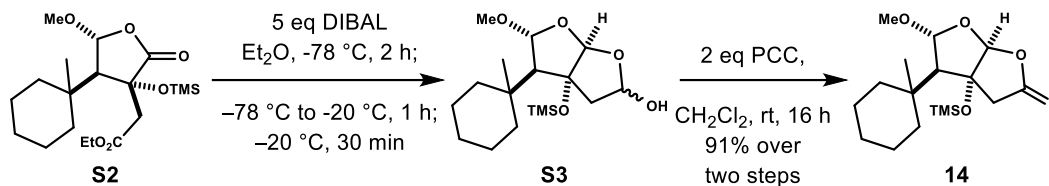

**Preparation of Dioxabicyclo[3.3.0]octan-3-one 14:** A 10 mL round-bottom flask was charged with lactone **S2** (19 mg, 0.05 mmol) and Et<sub>2</sub>O (1.5 mL, 0.03 M). The mixture was cooled to  $-78\text{ }^\circ\text{C}$  and DIBAL (0.25 mL, 0.25 mmol, 5 eq, 1 M in Hexanes) was added. The reaction was then stirred at  $-78\text{ }^\circ\text{C}$  for 2 h and then allowed to warm passively over an hour to  $-20\text{ }^\circ\text{C}$ . The reaction was stirred at  $-20\text{ }^\circ\text{C}$  for 30 min and then quenched by the addition of an aqueous solution of saturated with Rochelle's salt (2 mL) and saturated aqueous NaHCO<sub>3</sub> (2 mL). The mixture was then vigorously stirred for 30 min. The reaction mixture was then extracted with Et<sub>2</sub>O (3 x 10 mL). The organic extracts were then dried over MgSO<sub>4</sub>, filtered and concentrated to afford lactols **S3** as a colorless oil.

A 10 mL round-bottom flask was charged with the crude lactols **S3** and CH<sub>2</sub>Cl<sub>2</sub> (1.5 mL, 0.03 M). PCC (22 mg, 0.10 mmol, 2 eq) was added and the reaction mixture was stirred at rt for 16 h. Celite (2 g) was added to the reaction mixture followed by dilution with 10 mL of 4:1 hexane/EtOAc. The mixture was then filtered through a SiO<sub>2</sub> plug with 4:1 hexane/EtOAc (30 mL). The filtrate was concentrated to afford dioxabicyclo[3.3.0]octanone **14** (16 mg, 91% over two steps) as a colorless oil:  $R_f = 0.35$  (9:1 hexanes/EtOAc, visualized with KMnO<sub>4</sub>). This material was taken on without further purification, as the TMS-protecting group was quite labile. A small sample was purified by flash column chromatography for characterization purposes.

**<sup>1</sup>H NMR** (600 MHz, C<sub>6</sub>D<sub>6</sub>):  $\delta$  5.71 (s, 1H), 4.55 (d,  $J = 6.4$  Hz, 1H), 3.16 (s, 3H), 2.63 (d,  $J = 17.4$  Hz, 1H), 2.43 (d,  $J = 6.3$  Hz, 1H), 2.28 (d,  $J = 17.4$  Hz, 1H), 1.53-1.03 (m, 10H), 0.70 (s, 3H), 0.01 (s, 9H)

**<sup>13</sup>C NMR** (150 MHz, C<sub>6</sub>D<sub>6</sub>):  $\delta$  174.2, 106.8, 105.0, 85.3, 55.4, 39.0, 37.4, 37.0, 34.2, 25.9, 21.6, 21.3, 1.2

**IR** (thin film) 2924, 2850, 1803, 1254, 1162, 1129, 1111, 1054, 1031, 946, 913, 844

**HRMS** (ESI) calculated for [C<sub>17</sub>H<sub>30</sub>NaO<sub>5</sub>Si]<sup>+</sup> (M) 365.1760, observed 365.1761



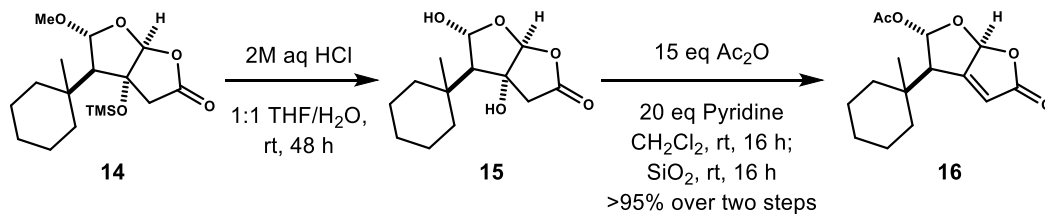

**Preparation of Dioxabicyclo[3.3.0]oct-4-en-3-one 16:** A 10 mL round-bottom flask was charged with lactone **14** (12 mg, 0.035 mmol) and THF (1 mL, 0.03 M). Aqueous HCl (1 mL, 4 M aqueous, 110 eq) was added, and the reaction mixture was allowed to stir at rt for 48 h. The reaction was then diluted with H<sub>2</sub>O (10 mL) and extracted with EtOAc (3 x 5 mL). The combined organic layers were then dried over MgSO<sub>4</sub>, filtered and concentrated to afford lactol **15** as colorless oil.

A 10 mL round-bottom flask was charged with the crude lactol **15**, DMAP (1.5 mg, 0.012 mmol, 35 mol%) and CH<sub>2</sub>Cl<sub>2</sub> (2 mL, 0.01 M). Then freshly distilled pyridine (60 μL, 0.75 mmol, 20 eq) was added followed by Ac<sub>2</sub>O (50 μL, 0.53 mmol, 15 eq). The reaction mixture was then stirred at rt for 24 h. The reaction was quenched by the addition of H<sub>2</sub>O (10 mL) and extracted with CH<sub>2</sub>Cl<sub>2</sub> (3 x 5 mL). The combined organic layers were dried over MgSO<sub>4</sub> and filtered. SiO<sub>2</sub> (2 g) was added to the filtrate and the mixture was concentrated to give a colorless solid, which was allowed to sit at rt under vacuum for 16 h. The material was then purified by column chromatography (SiO<sub>2</sub>, 4:1 Hex/EtOAc) to afford butenolide **16** (10 mg, >95%) as a colorless oil. R<sub>f</sub> = 0.26 (4:1 Hex/EtOAc, visualized with KMnO<sub>4</sub>).

**<sup>1</sup>H NMR** (600 MHz, CDCl<sub>3</sub>): δ 6.48 (d, *J* = 3.9 Hz, 1H), 6.16 (s, 1H), 5.97 (d, *J* = 2.1 Hz, 1H), 3.25-3.21 (m, 1H), 2.13 (s, 3H), 1.54-1.48 (m, 4H), 1.47-1.35 (m, 3H), 1.34-1.27 (m, 3H), 1.01 (s, 3H)

**<sup>13</sup>C NMR** (150 MHz, CDCl<sub>3</sub>): δ 171.0, 169.3, 167.5, 115.4, 104.1, 100.5, 53.7, 36.2, 36.1, 34.3, 25.9, 21.5, 21.3, 21.2, 20.7

**IR** (thin film) 2925, 2851, 1790, 1749, 1660, 1446, 1368, 1215, 1164, 1133, 1043, 987, 973, 944, 863

**HRMS** (ESI) calculated for [C<sub>15</sub>H<sub>20</sub>NaO<sub>5</sub>]<sup>+</sup> (M+Na) 303.1208, observed 303.1214

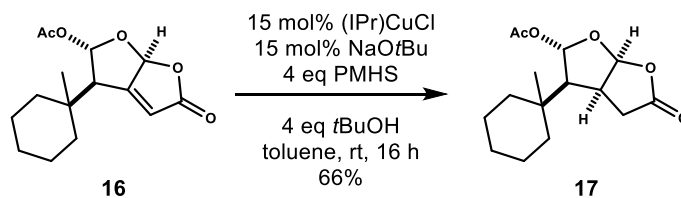

**Preparation of Dioxabicyclo[3.3.0]octan-3-one **17**:** A 5 mL round-bottom flask was charged with (*i*Pr)CuCl (2.3 mg, 0.0047 mmol, 15 mol%), NaOtBu (0.05 mL, 0.1 M in toluene, 15 mol%), and toluene (0.5 mL). PMHS (7  $\mu$ L, 0.1 mmol, 4 eq) was added as a solution in toluene (0.1 mL). The reaction mixture was then stirred for 5 min. Then a solution of butenolide **16** (8.1 mg, 0.029 mmol) and *t*BuOH (11  $\mu$ L, 0.12 mmol, 4 eq) in toluene (0.5 mL) was added to the reaction. The mixture was then stirred at rt for 16 h. The reaction was quenched by the addition of H<sub>2</sub>O (5 mL) and allowed to stir for 5 min. The mixture was then extracted with EtOAc (3 x 5 mL). The organic layers were dried over MgSO<sub>4</sub>, filtered, and concentrated to a colorless solid. This material was purified by flash column chromatography (SiO<sub>2</sub>, 4:1 Hexanes/EtOAc) to afford lactone **17** (5.3 mg, 66%) as a colorless solid. R<sub>f</sub> = 0.36 (4:1 Hexanes/EtOAc, visualized with KMnO<sub>4</sub>)

**<sup>1</sup>H NMR** (600 MHz, CDCl<sub>3</sub>):  $\delta$  6.41 (d,  $J$  = 7.1 Hz, 1H), 6.04 (d,  $J$  = 4.0 Hz, 1H), 3.07 (dddd,  $J$  = 4.4, 6.4, 9.2, 10.2 Hz, 1H), 2.72 (dd,  $J$  = 10.2, 17.5 Hz, 1H), 2.55 (dd,  $J$  = 9.1, 17.6 Hz, 1H), 2.57-2.53 (m, 1H), 2.09 (s, 3H), 1.56-1.51 (m, 2H), 1.51-1.43 (m, 3H), 1.37-1.31 (m, 3H), 1.29-1.21 (m, 2H), 1.03 (s, 3H)

**<sup>13</sup>C NMR** (150 MHz, CDCl<sub>3</sub>):  $\delta$  175.5, 169.9, 105.1, 96.7, 54.1, 41.3, 38.0, 37.4, 34.0, 29.7, 25.8, 22.7, 21.7, 21.3, 21.2

**IR** (thin film) 2925, 2851, 1795, 1749, 1376, 1228, 1163, 1016, 984, 939, 865

**HRMS** (ESI) calculated for [C<sub>15</sub>H<sub>22</sub>O<sub>5</sub>Na]<sup>+</sup> (M+Na) 305.1365, observed 305.1375

## Preparation of (-)-Macfarlandin C

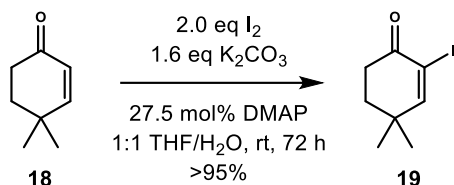

**Preparation of 2-iodo-4,4-dimethylcyclohex-2-en-1-one (19):**<sup>3</sup> To a solution of 4,4-dimethylcyclohex-2-ene-1-one (**18**) (18 mL, 140 mmol) in 1:1 THF/H<sub>2</sub>O (680 mL, 0.2 M) at rt was sequentially added K<sub>2</sub>CO<sub>3</sub> (23 g, 160 mmol, 1.2 eq), I<sub>2</sub> (52 g, 205 mmol, 1.5 eq) and DMAP (3.3 g, 27 mmol, 20 mol%). The purple heterogeneous solution was stirred vigorously for 48 h at rt. After this time, additional K<sub>2</sub>CO<sub>3</sub> (7.6 g, 55 mmol, 0.4 eq), I<sub>2</sub> (17 g, 68 mmol, 0.5 eq), and DMAP (1.3 g, 10 mmol, 7.5 mol %) were added sequentially. After stirring for an additional 24 h at rt, Et<sub>2</sub>O (500 mL) was added and the biphasic mixture was transferred to a separatory funnel. The organic layer was separated, washed with saturated aqueous Na<sub>2</sub>S<sub>2</sub>O<sub>3</sub> solution (3 x 300 mL) and brine (2 x 300 mL), and then dried over Na<sub>2</sub>SO<sub>4</sub>. The drying agent was removed by filtration and the filtrate concentrated to provide a viscous yellow oil. The crude product was loaded onto a short plug of silica gel and was quickly eluted into a single round-bottom flask using Et<sub>2</sub>O (1.5 L). Removal of the solvent under reduced pressure gave iodoenone **19** (34.2 g, 136 mmol, >95%) as an orange oil that solidified upon storage at -20 °C. Spectral data acquired for the compound matched those previously reported.<sup>3</sup>

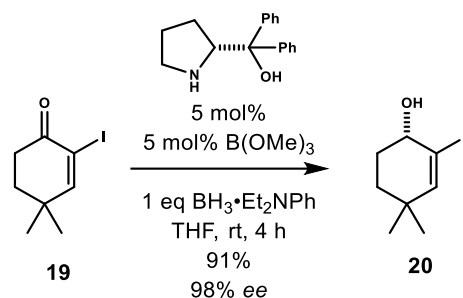

**Preparation of (*S*)-2-iodo-4,4-dimethylcyclohex-2-en-1-ol (**20**):**<sup>5</sup> To a solution of *D*-diphenylprolinol (250 mg, 1.0 mmol, 5 mol %) in THF (21 mL) under argon at rt was added B(OMe)<sub>3</sub> (110 μL, 1.0 mmol, 5 mol%) under argon. The resulting colorless solution was maintained at rt for 1h. After this time, BH<sub>3</sub>·Et<sub>2</sub>NPh (3.56 mL, 20.0 mmol, 1 eq) was added via syringe. A solution of enone **19** (5.00 g, 20.0 mmol) in THF (21 mL, ~1 M) was then added over 1 h using a syringe pump. After the addition was complete, the homogenous solution was maintained at rt for an additional 3 h. Methanol (10 mL) was then added and the reaction mixture was concentrated under reduced pressure. The residue was diluted with Et<sub>2</sub>O (200 mL) and washed with saturated aqueous Na<sub>2</sub>CO<sub>3</sub> (3 x 150 mL), saturated aqueous KHSO<sub>4</sub> (3 x 150 mL) and brine (3 x 150 mL). The organic layer was dried over MgSO<sub>4</sub>, filtered and concentrated to provide a crude residue that was purified by flash column chromatography (SiO<sub>2</sub>, 4:1 Hex/EtOAc) to afford alcohol **20** (4.58 g, 18.2 mmol, 91%) as a colorless oil. Characterization data for **20** matched those previously reported. Analysis by HPLC confirmed that the compound was obtained in 98% *ee*: OD-H column, 215 nm, 2% IPA/*n*-hexane, 0.3 mL/min: t<sub>R</sub> 26.5 min (major), 32.6 min (minor). [α]<sup>26.7</sup><sub>D</sub> -39.8, [α]<sup>26.7</sup><sub>577</sub> -42.0, [α]<sup>26.7</sup><sub>546</sub> -49.3, [α]<sup>26.7</sup><sub>435</sub> -92.2, [α]<sup>26.7</sup><sub>405</sub> -117 (*c* = 1.28, CHCl<sub>3</sub>). The *R*-enantiomer of **20** was previously prepared by Overman and Knochel.<sup>4,5</sup>

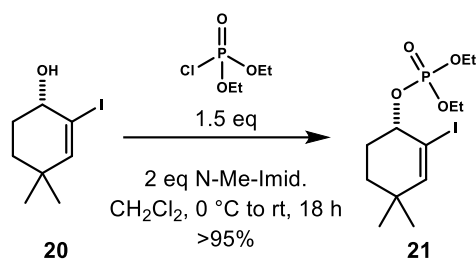

**Preparation of (S)-diethyl (2-iodo-4,4-dimethylcyclohex-2-en-1-yl) phosphate (21):**<sup>5</sup> To a solution of alcohol **20** (4.58 g, 18.2 mmol) in  $\text{CH}_2\text{Cl}_2$  (48 mL, ~0.4 M) at 0 °C was added sequentially *N*-methylimidazole (2.9 mL, 36 mmol, 2 eq) and diethyl chlorophosphate (3.9 mL, 27 mmol, 1.5 eq). The mixture was allowed to warm to rt and maintained at this temperature for 18 h. Brine (50 mL) was added and the biphasic mixture was transferred to a separatory funnel. The layers were separated and the aqueous layer was extracted with  $\text{CH}_2\text{Cl}_2$  (3 x 50 mL). The combined organic layers were dried over  $\text{Na}_2\text{SO}_4$ , filtered, and concentrated. The residue was purified by flash column chromatography ( $\text{SiO}_2$ , 3:1  $\rightarrow$  1:1 Hex/EtOAc) to provide phosphate **21** (6.78 g, 17.5 mmol, >95%) as a colorless oil. Spectral data acquired for the compound matched those previously reported for the enantiomer.<sup>5</sup>  $[\alpha]_{\text{D}}^{26.7} -27.2$ ,  $[\alpha]_{577}^{26.7} -29.8$ ,  $[\alpha]_{546}^{26.7} -34.1$ ,  $[\alpha]_{435}^{26.7} -63.8$ ,  $[\alpha]_{405}^{26.7} -79.6$  ( $c = 1.10$ ,  $\text{CHCl}_3$ ).

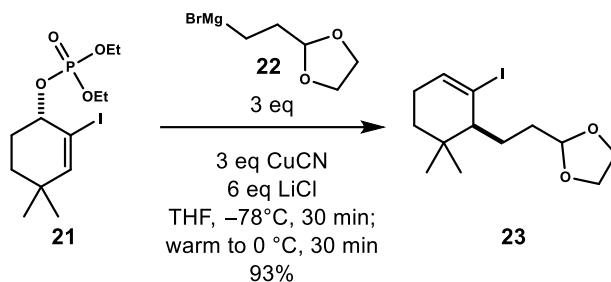

**Preparation of (S)-2-(2-(2-iodo-6,6-dimethylcyclohex-2-en-1-yl)ethyl)-1,3-dioxolane (23):**<sup>5</sup> A solution of 2-(2-bromoethyl)-1,3-dioxolane (6.96 g, 38.7 mmol, 3 eq) and 1,2-dibromoethane (0.7 mL, 8 mmol, 0.65 eq) in THF (25 mL) was added to a suspension of Mg turnings (2.82 g, 116 mmol, 9 eq) in THF (55 mL). The mixture was briefly warmed with the heat gun for 10 sec, and was then stirred for 2 h at rt. The resulting black suspension of Grignard reagent **22** was then transferred via cannula to a round-bottom flask containing a stir bar under argon. The mixture was cooled to  $-78^{\circ}\text{C}$  and a homogenous solution of CuCN (3.46 g, 38.7 mmol, 3 eq) and LiCl (3.28 g, 77.3 mmol, 6 eq) in THF (40 mL) was added via syringe. After stirring vigorously for 15 min at  $-78^{\circ}\text{C}$ , a solution of phosphate **21** (5.00 g, 12.8 mmol) in THF (25 mL) was added. The resulting suspension was stirred for 30 min at  $-78^{\circ}\text{C}$  and then was allowed to warm to  $0^{\circ}\text{C}$  while stirring for an additional 30 min. Saturated aqueous  $\text{NH}_4\text{Cl}$  solution (150 mL) was added and the biphasic mixture was transferred to a separatory funnel. The aqueous layer was extracted with  $\text{Et}_2\text{O}$  (3 x 200 mL) and the combined organic layers were washed with brine (2 x 300 mL), dried over  $\text{MgSO}_4$ , filtered and concentrated. The residue was purified by flash column chromatography ( $\text{SiO}_2$ , 20:1 Hex/ $\text{EtOAc}$ ) to afford vinyl iodide **23** (4.03 g, 11.9 mmol, 93%) as a colorless oil. Spectral data acquired for the compound matched those previously reported for the enantiomer.<sup>5</sup>  $[\alpha]^{24.9}_{\text{D}} -59.2$ ,  $[\alpha]^{24.9}_{577} -62.6$ ,  $[\alpha]^{25.0}_{546} -70.5$ ,  $[\alpha]^{25.1}_{435} -126.5$ ,  $[\alpha]^{25.1}_{405} -156$  ( $c = 1.02$ ,  $\text{CHCl}_3$ ).

Analysis of a comparable sample ( $[\alpha]^{26.7}_{\text{D}} -58.5$ ) by HPLC confirmed that the enantiomeric purity of this sample was 99% ee: AD column, 215 nm, 0.5% IPA/n-hexane, 0.15 mL/min.  $t_{\text{R}}$ : 36.5 min (major), 39.0 min (minor).

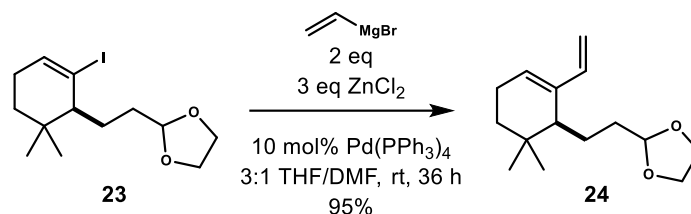

**Preparation of (S)-2-(2-(6,6-dimethyl-2-vinylcyclohex-2-en-1-yl)ethyl)-1,3-dioxolane (24):** A solution of vinyl magnesium bromide (22.5 mL, 22.5 mmol, 2 eq, 1 M in THF) was added to a solution of ZnCl<sub>2</sub> (48 mL, 34 mmol, 3 eq, 0.7 M in THF) and THF (19 mL) at  $-78$  °C. The suspension was then allowed to warm over 1.5 h to rt while stirring. A solution of iodide **23** (3.78 g, 11.2 mmol) and Pd(PPh<sub>3</sub>)<sub>4</sub> (1.30 g, 1.12 mmol, 10 mol%) in THF (25 mL) and DMF (25 mL) was added slowly. The reaction mixture was allowed to stir at rt for 36 h, after which saturated aqueous NH<sub>4</sub>Cl solution (100 mL) was added. The mixture was extracted with Et<sub>2</sub>O (3 x 150 mL), and the organic layer was separated, washed with brine (2 x 200 mL), dried over MgSO<sub>4</sub>, filtered, and concentrated under reduced pressure. The residue was purified by flash column chromatography (SiO<sub>2</sub>, 30:1 → 15:1 Hex/EtOAc) to provide diene **24** (2.54 g, 10.7 mmol, 95%) as a colorless oil:  $R_f = 0.61$  (9:1 Hex/EtOAc).

**<sup>1</sup>H NMR** (500 MHz, CDCl<sub>3</sub>)  $\delta$  6.29 (dd,  $J = 17.7, 10.8$  Hz, 1H), 5.64-5.61 (m, 1H), 5.06 (d,  $J = 17.7$  Hz, 1H), 4.88 (d,  $J = 11.1$  Hz, 1H), 4.75 (t,  $J = 4.8$  Hz, 1H), 3.98-3.91 (m, 2H), 3.84-3.79 (m, 2H), 2.15-2.10 (m, 2H), 1.96-1.92 (m, 1H), 1.76-1.69 (m, 2H), 1.66-1.57 (m, 2H), 1.42-1.34 (m, 1H), 1.18-1.12 (m, 1H), 1.00 (s, 3H), 0.85 (s, 3H)

**<sup>13</sup>C NMR** (125 MHz, CDCl<sub>3</sub>)  $\delta$  140.5, 140.2, 127.9, 109.8, 105.1, 64.95, 64.92, 43.0, 34.7, 32.5, 20.5, 28.8, 27.0, 26.8, 23.7

**IR** (thin film) 2954, 2870, 1647, 1406, 1139, 1034, 893 cm<sup>-1</sup>

**HRMS** (ESI) calculated for C<sub>15</sub>H<sub>28</sub>NO<sub>2</sub> (M + NH<sub>4</sub>)<sup>+</sup> 254.2120, observed 254.2129

**Optical Rotation**  $[\alpha]^{22.4}_D -87.4$ ,  $[\alpha]^{22.4}_{577} -93.7$ ,  $[\alpha]^{22.4}_{546} -105$ ,  $[\alpha]^{22.4}_{435} -183$ ,  $[\alpha]^{22.4}_{405} -219$  ( $c = 1.02$ , CHCl<sub>3</sub>)

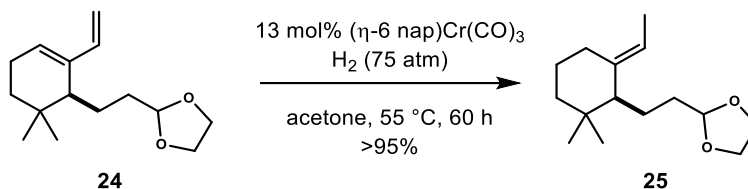

**Preparation of (*S,E*)-2-(2-(6-ethylidene-2,2-dimethylcyclohexyl)ethyl)-1,3-dioxolane (**25**):** In a glove box under a  $\text{N}_2$  atmosphere, a stainless steel Parr bomb containing a stir bar was charged with ( $\eta^6$ -naphthalene)chromium tricarbonyl (560 mg, 2.1 mmol, 13 mol %), diene **24** (3.94 g, 16.7 mmol) and acetone (170 mL, 0.1 M, degassed in a Schlenk tube by three freeze-pump-thaw cycles prior to bringing into the glove box). The Parr bomb was sealed, removed from the glove box, and quickly purged with  $\text{H}_2$  gas three times before being pressurized to 75 atm ( $\sim 1100$  psi)  $\text{H}_2$ . The apparatus was then placed in a sand bath preheated to  $55 \text{ }^\circ\text{C}$  and was maintained at this temperature while stirring for 60 h. The  $\text{H}_2$  pressure was released and the reaction mixture was transferred to a round-bottom flask and concentrated. The crude residue was purified by flash column chromatography ( $\text{SiO}_2$ , 50:1 Hex/EtOAc) to afford (*E*)-ethylidene acetal **25** (3.97 g, 16.6 mmol,  $>95\%$ ) as a colorless oil:  $R_f = 0.67$  (9:1 Hex/EtOAc).

**$^1\text{H NMR}$**  (600 MHz,  $\text{CDCl}_3$ )  $\delta$  5.08 (q,  $J = 6.4$  Hz, 1H), 4.82 (t,  $J = 4.4$  Hz, 1H), 3.98-3.95 (m, 2H), 3.87-3.82 (m, 2H), 2.28-2.25 (m, 1H), 1.76-1.71 (m, 1H), 1.59 (dd,  $J = 6.7, 1.0$  Hz, 3H), 1.56-1.34 (m, 8H), 1.19-1.14 (m, 1H), 0.87 (s, 3H), 0.85 (s, 3H)

**$^{13}\text{C NMR}$**  (125 MHz,  $\text{CDCl}_3$ )  $\delta$  138.9, 118.0, 105.2, 65.0, 64.9, 55.7, 35.6, 34.8, 32.8, 28.2, 28.0, 23.8, 22.9, 21.2, 12.8

**IR** (thin film) 2951, 2926, 2460, 1408, 1382, 1364, 1140, 1037, 955, 891, 907, 824  $\text{cm}^{-1}$

**HRMS** (CI) calculated for  $\text{C}_{15}\text{H}_{26}\text{O}_2$  ( $\text{M}$ ) $^+$  238.1933, observed 238.1942

**Optical Rotation**  $[\alpha]^{22.7}_{\text{D}} +32.8$ ,  $[\alpha]^{22.7}_{577} +33.3$ ,  $[\alpha]^{22.7}_{546} +38.2$ ,  $[\alpha]^{22.7}_{435} +60.8$ ,  $[\alpha]^{22.7}_{405} +74.5$  ( $c = 0.96$ ,  $\text{CHCl}_3$ )



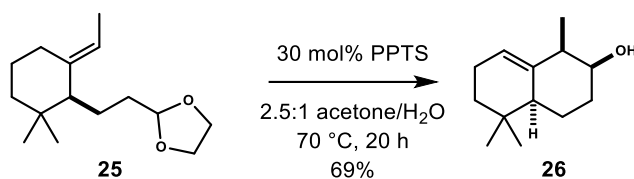

**Preparation of (1R,2S,4aS)-1,5,5-trimethyl-1,2,3,4,4a,5,6,7-octahydronaphthalen-2-ol (26):**

A round-bottom flask was charged with ethylidene acetal **25** (3.97 g, 16.6 mmol), acetone (150 mL, 0.1 M), and H<sub>2</sub>O (57 mL, 220 eq). To the mixture was added pyridine *p*-toluenesulfonate (PPTS, 1.26 g, 5.01 mmol, 30 mol %), and the flask was placed in a sand bath pre-heated to 70 °C. The reaction was stirred at this temperature for 20 h, after which it was allowed to cool to rt. The mixture was diluted with H<sub>2</sub>O (100 mL) and extracted with Et<sub>2</sub>O (3 x 100 mL). The combined organic layers were washed with brine (2 x 100 mL), dried over MgSO<sub>4</sub>, filtered, and concentrated under reduced pressure. The crude residue was purified by flash column chromatography (SiO<sub>2</sub>, 9:1 Hex/EtOAc) to afford alcohol **26** (2.23 g, 11.5 mmol, 69%) as a colorless oil which solidified upon storage at -20 °C: R<sub>f</sub> = 0.40 (9:1 Hex/EtOAc).

<sup>1</sup>H NMR (600 MHz, CDCl<sub>3</sub>) δ 5.38 (br s, 1H), 3.82-3.72 (m, 1H), 2.28-2.24 (m, 1H), 2.05-2.02 (m, 2H), 1.92 (dq, *J* = 13.7, 3.2 Hz, 1H), 1.69-1.65 (m, 1H), 1.60 (tdd, *J* = 2.4, 4.5, 13.6 Hz, 1H), 1.53-1.50 (m, 1H), 1.41-1.34 (m, 2H), 1.32 (qd, *J* = 4.0, 12.9 Hz, 1H), 1.17 (dt, *J* = 4.7, 13.0 Hz, 1H), 1.06 (d, *J* = 6.9 Hz, 3H), 0.90 (s, 3H), 0.86 (s, 3H)

<sup>13</sup>C NMR (150 MHz, CDCl<sub>3</sub>) δ 140.0, 119.6, 72.4, 49.1, 43.7, 33.9, 32.7, 31.4, 27.8, 27.0, 24.4, 23.0, 14.3

IR (thin film) 2911, 2867, 2360, 2340, 1452, 1382, 1363, 1186, 1093, 969, 940, 714 cm<sup>-1</sup>

HRMS (CI) calculated for C<sub>13</sub>H<sub>22</sub>O (M)<sup>+</sup> 194.1671, observed 194.1672

Optical Rotation [α]<sup>22.5</sup><sub>D</sub> -84.8, [α]<sup>22.5</sup><sub>577</sub> -89.2, [α]<sup>22.5</sup><sub>546</sub> -101, [α]<sup>22.7</sup><sub>435</sub> -174, [α]<sup>22.7</sup><sub>405</sub> -208 (*c* = 1.14, CHCl<sub>3</sub>)

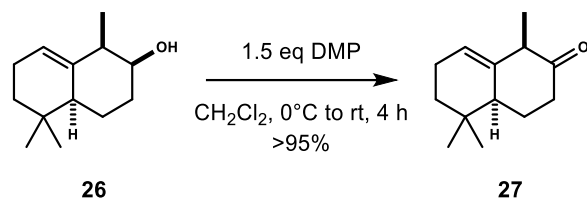

**Preparation of (1*R*,4*aS*)-1,5,5-trimethyl-3,4,4*a*,5,6,7-hexahydronaphthalen-2(1*H*)-one (27):**

A round-bottom flask was charged with alcohol **26** (808 mg, 4.16 mmol) and  $\text{CH}_2\text{Cl}_2$  (40 mL, 0.1 M) under argon. The solution was cooled to 0 °C and Dess-Martin periodinane (DMP, 2.11 g, 4.99 mmol, 1.2 eq)<sup>6</sup> was added in one portion. The reaction mixture was then allowed to warm to rt and was maintained at this temperature for 2 h. TLC analysis indicated starting material was still present, so an additional portion of DMP (0.35 g, 0.82 mmol, 0.2 eq) was added. The reaction was stirred for an additional 2 h, after which TLC analysis indicated that the starting material was consumed. The reaction mixture was then diluted with  $\text{Et}_2\text{O}$  (40 mL) and the solution was flushed through a pad of Celite<sup>®</sup>. The pad of Celite<sup>®</sup> was washed with  $\text{Et}_2\text{O}$  (300 mL), and the filtrate was concentrated under reduced pressure. The oily solid residue was suspended in 9:1 Hex/EtOAc (20 mL) and flushed through a small plug of silica gel. The plug of silica gel was eluted with 9:1 Hex/EtOAc (300 mL), and the filtrate was concentrated to afford ketone **27** (777 mg, 4.04 mmol, >95%) as a colorless oil.  $\beta,\gamma$ -Unsaturated ketone **27** was prone to double bond isomerization upon storage at room temperature and was used immediately in the next step:  $R_f = 0.48$  (9:1 Hex/EtOAc).

**<sup>1</sup>H NMR** (600 MHz,  $\text{CDCl}_3$ )  $\delta$  5.41 (br s, 1H), 3.04-3.00 (m, 1H), 2.48 (ddd,  $J = 3.5, 5.1, 14.5$  Hz, 1H), 2.41 (dddd,  $J = 1.0, 6.2, 12.3, 14.6$  Hz, 1H), 2.11-2.04 (m, 2H), 2.04-1.98 (m, 2H), 1.48-1.42 (m, 1H), 1.41-1.36 (m, 1H), 1.23 (dt,  $J = 5.1, 13.1$  Hz, 1H), 1.16 (d,  $J = 6.6$  Hz, 3H), 1.00 (s, 3H), 0.92 (s, 3H)

**<sup>13</sup>C NMR** (125 MHz,  $\text{CDCl}_3$ )  $\delta$  210.9, 139.0, 118.5, 52.2, 48.0, 41.1, 32.9, 31.8, 28.1, 27.7, 26.5, 23.1, 10.5

**IR** (thin film) 2953, 2869, 1717, 1673, 1453, 1365, 1337, 1174, 953, 849  $\text{cm}^{-1}$

**HRMS** (EI) calculated for  $\text{C}_{13}\text{H}_{20}\text{O}$  ( $M$ )<sup>+</sup> 192.1514, observed 192.1519

**Optical Rotation**  $[\alpha]^{22.5}_{\text{D}} -139$ ,  $[\alpha]^{22.5}_{577} -148$ ,  $[\alpha]^{22.5}_{546} -171$ ,  $[\alpha]^{22.5}_{435} -333$ ,  $[\alpha]^{22.5}_{405} -72.8$  ( $c = 1.05$ ,  $\text{CHCl}_3$ )

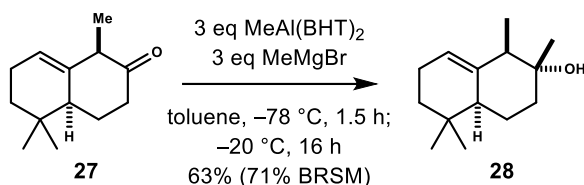

**Preparation of (1*R*,2*R*,4*aS*)-1,2,5,5-tetramethyl-1,2,3,4,4*a*,5,6,7-octahydronaphthalen-2-ol (28):**<sup>7</sup> A round-bottom flask was charged with 2,6-di-*tert*-butyl-4-methylphenol (5.34 g, 24.2 mmol, 6 eq) and toluene (40 mL) under argon. A solution of AlMe<sub>3</sub> (6.1 mL, 12 mmol, 3 eq, 2 M in toluene) was added slowly via syringe at rt and vigorous gas evolution was observed. The homogenous light-yellow solution was maintained at rt for 1 h, after which it was cooled to -78 °C. Ketone **27** (777 mg, 4.04 mmol) was added slowly as a solution in toluene (16 mL) and the resulting solution was maintained at -78 °C for 10 min. A solution of MeMgBr (4.0 mL, 12 mmol, 3 eq, 3.0 M in Et<sub>2</sub>O) was added slowly, and the solution was maintained at -78 °C for 1.5 h. The reaction mixture was then allowed to slowly warm to -20 °C overnight (16 h). After this time, the solution was then allowed to warm to 0 °C over 20 min. The reaction mixture was then quenched with saturated aqueous NH<sub>4</sub>Cl solution (40 mL) and the layers were separated. The aqueous layer was extracted with Et<sub>2</sub>O (3 x 50 mL), and the combined organic layers were washed with brine (2 x 40 mL), dried over MgSO<sub>4</sub>, filtered, and concentrated under reduced pressure. The residue was purified by flash column chromatography (SiO<sub>2</sub>, 9:1 Hex/EtOAc) to afford alcohol **31** (532 mg, 2.55 mmol, 63%) as a colorless solid: R<sub>f</sub> = 0.30 (9:1 Hex/EtOAc) and recovered ketone **30** (64.3 mg, 0.33 mmol, 8%).

**<sup>1</sup>H NMR** (500 MHz, CDCl<sub>3</sub>) δ 5.35 (br s, 1H), 2.07-1.98 (m, 3H), 1.84 (dt, *J* = 3,7, 12.8 Hz, 1H), 1.76 (dq, *J* = 4.4, 13.3 Hz, 1H), 1.61-1.53 (m, 2H), 1.45-1.35 (br s, 1H), 1.35-1.29 (m, 1H), 1.20-1.15 (m, 1H), 1.11 (qd, *J* = 4.0, 13.1 Hz, 1H), 1.04 (d, *J* = 6.9 Hz, 3H), 0.96 (s, 3H), 0.91 (s, 3H), 0.83 (s, 3H)

**<sup>13</sup>C NMR** (125 MHz, CDCl<sub>3</sub>) δ 140.9, 117.8, 74.5, 48.9, 48.5, 42.8, 34.0, 31.4, 28.4, 26.0, 23.0, 20.2, 10.6

**IR** (thin film) 3307, 2947, 2922, 2845, 1454, 1374, 1126, 1001, 948 cm<sup>-1</sup>

**HRMS** Several attempts to acquire HRMS data for alcohol **31** using ESI and CI ionization techniques were unsuccessful

**Optical Rotation** [α]<sup>22.4</sup><sub>D</sub> -88.5, [α]<sup>22.4</sup><sub>577</sub> -91.6, [α]<sup>22.4</sup><sub>546</sub> -108.8, [α]<sup>22.4</sup><sub>435</sub> -180.6, [α]<sup>22.4</sup><sub>405</sub> -212.5 (*c* = 0.04, CHCl<sub>3</sub>)

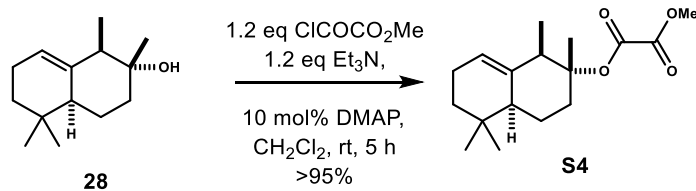

**Preparation of Methyl Oxalate S4:** A round-bottom flask was charged with alcohol **28** (558 mg, 2.67 mmol), DMAP (33 mg, 0.27 mmol, 10 mol %) and CH<sub>2</sub>Cl<sub>2</sub> (14 mL, 0.2 M) under argon. After sequential addition of Et<sub>3</sub>N (0.75 mL, 5.35 mmol, 2 eq) and methyl chlorooxacetate (0.49 mL, 5.3 mmol, 2 eq), the reaction was maintained at rt for 5 h, after which time TLC analysis indicated complete conversion. The reaction mixture was diluted with saturated aqueous NH<sub>4</sub>Cl solution (20 mL) and the layers were separated. The aqueous layer was extracted with CH<sub>2</sub>Cl<sub>2</sub> (3 x 20 mL), and the combined organic layers were washed with brine (2 x 20 mL), dried over MgSO<sub>4</sub>, filtered, and concentrated under reduced pressure. The crude residue was purified by flash column chromatography (SiO<sub>2</sub>, 30:1 Hex/EtOAc) to afford methyl oxalate ester **S4** (773 mg, 2.62 mmol, >95%) as a colorless oil: R<sub>f</sub> = 0.57 (9:1 Hex/EtOAc).

**<sup>1</sup>H NMR** (500 MHz, CDCl<sub>3</sub>) δ 5.43 (s, 1H), 3.86 (s, 3H), 2.65-2.55 (m, 2H), 2.03-1.98 (m, 2H), 1.89 (td, *J* = 13.2, 4.0 Hz, 1H), 1.83-1.77 (m, 1H), 1.64-1.57 (m, 1H), 1.33 (s, 3H), 1.32-1.28 (m, 1H), 1.23-1.16 (m, 1H), 1.16-1.07 (m, 1H), 1.05 (d, *J* = 7.1 Hz, 3H), 0.90 (s, 3H), 0.82 (s, 3H)

**<sup>13</sup>C NMR** (125 MHz, CDCl<sub>3</sub>) δ 159.2, 156.8, 139.3, 119.7, 91.2, 53.4, 48.2, 46.1, 36.7, 34.0, 31.4, 28.4, 25.7, 25.4, 23.0, 17.3, 10.9

**IR** (thin film) 2951, 2919, 1772, 1741, 1200, 1168 cm<sup>-1</sup>

**HRMS** (ESI) calculated for C<sub>17</sub>H<sub>26</sub>O<sub>4</sub>Na (M + Na)<sup>+</sup> 317.1729, observed 317.1732

**Optical Rotation** [α]<sup>22.4</sup><sub>D</sub> -103, [α]<sup>22.4</sup><sub>577</sub> -101, [α]<sup>22.4</sup><sub>546</sub> -108, [α]<sup>22.4</sup><sub>435</sub> -187, [α]<sup>22.4</sup><sub>405</sub> -222 (*c* = 0.22, CHCl<sub>3</sub>)

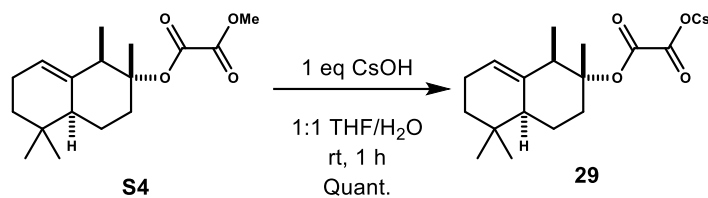

**Preparation of Cesium Oxalate 29:** A round-bottom flask was charged with methyl oxalate ester **S4** (379 mg, 1.29 mmol) and THF (2.6 mL). A solution of CsOH (1.29 mL, 1.29 mmol, 1 M in H<sub>2</sub>O) was added slowly. The reaction was then stirred at rt for 1 h, after which TLC analysis indicated that starting material had been consumed. The reaction was then carefully concentrated under reduced pressure at 50 °C. The residue was then dried under vacuum overnight to produce cesium oxalate salt **29** (525 mg, 1.27 mmol, 99%) as a colorless powder.

**<sup>1</sup>H NMR** (500 MHz, DMSO-*d*<sub>6</sub>) δ 5.36 (br s, 1 H), 2.56-2.52 (m, 1H), 2.41-2.35 (m, 1H), 2.00-1.93 (m, 1H), 1.84 (td, *J* = 3.5, 13.6 Hz, 1H), 1.75-1.69 (m, 1H), 1.61-1.55 (m, 1H), 1.33-1.26 (m, 1H), 1.18-1.14 (m, 1H), 1.12 (s, 3H), 1.05 (qd, *J* = 3.8, 13.7 Hz, 1H), 0.93 (d, *J* = 7.0 Hz, 3H), 0.88 (s, 3H), 0.80 (s, 3H)

**<sup>13</sup>C NMR** (125 MHz, DMSO-*d*<sub>6</sub>) δ 167.5, 163.4, 139.8, 118.0, 83.7, 47.6, 45.3, 36.4, 33.6, 30.9, 28.1, 25.3, 24.8, 22.4, 17.5, 10.5

**IR** (thin film) 2943, 2907, 2866, 2843, 1705, 1689, 1644, 1605, 1381, 1221, 1089, 898, 780, 764, 749

**HRMS** (ESI) calculated for C<sub>16</sub>H<sub>23</sub>O<sub>4</sub> (M-Cs)<sup>-</sup> 279.1596, observed 279.1602

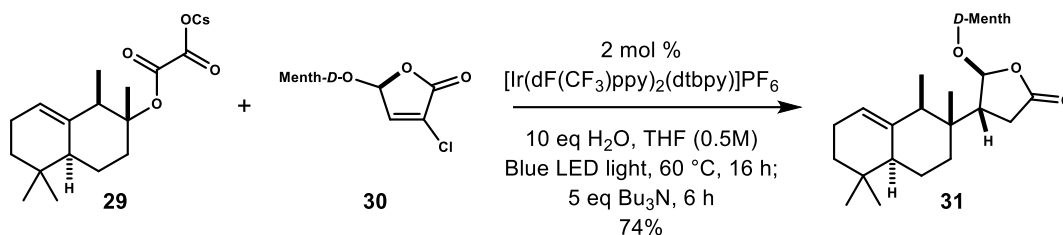

**Preparation of Lactone 31:** Cesium oxalate **29** (414 mg, 1.00 mmol), chlorobutenolide **30** (274 mg, 1.00 mmol, 1 eq)<sup>1,2</sup>,  $[\text{Ir}(\text{dF}(\text{CF}_3)\text{ppy})_2(\text{dtbbpy})]\text{PF}_6$  (22.8 mg, 0.02 mmol, 2 mol %),  $\text{H}_2\text{O}$  (0.18 mL, 10 mmol, 10 eq), and THF (2 mL, 0.5 M) were divided equally into four 2-dram vials. The vials were then sparged with argon for 15 min. The vials were then placed in a photobox and irradiated with blue LEDs at 60 °C for 20 h. Then *n*- $\text{Bu}_3\text{N}$  (0.30 mL, 1.3 mmol, 5 eq) was added to each vial and irradiation was continued for another 6 h. The reactions were then poured into a separatory funnel and diluted with  $\text{H}_2\text{O}$  (15 mL) and extracted with  $\text{Et}_2\text{O}$  (3 x 10 mL). The organics were then dried over  $\text{MgSO}_4$ , filtered, and concentrated to an orange oil. The residue was then purified by flash column chromatography ( $\text{SiO}_2$ , 30:1→20:1 Hex/ $\text{EtOAc}$ ) to afford lactone **31** (320 mg, 74%) as a colorless solid  $R_f = 0.45$  (9:1 Hex/ $\text{EtOAc}$ ).

**$^1\text{H NMR}$**  (600 MHz,  $\text{CDCl}_3$ )  $\delta$  5.68 (d,  $J = 1.3$  Hz, 1H), 5.33 (dd,  $J = 2.2, 3.5$  Hz, 1H), 3.52 (dt,  $J = 4.1, 10.5$  Hz, 1H), 2.72 (dd,  $J = 9.8, 18.3$  Hz, 1H), 2.49 (ddd,  $J = 1.3, 3.3, 10.1$  Hz, 1H), 2.36 (dd,  $J = 3.5, 18.2$  Hz, 1H), 2.18-2.12 (m, 1H), 2.11-2.05 (m, 2H), 2.05-2.00 (m, 2H), 1.73-1.60 (m, 3H), 1.51-1.45 (m, 1H), 1.42 (dt,  $J = 3.1, 12.6$  Hz, 1H), 1.40-1.33 (m, 2H), 1.28 (dt,  $J = 3.8, 8.9$  Hz, 1H), 1.24-1.14 (m, 3H), 1.05-0.97 (m, 1H), 0.96 (d,  $J = 7.0$  Hz, 3H), 0.94 (d,  $J = 6.8$  Hz, 3H), 0.92-0.81 (m, 2H), 0.91 (s, 3H), 0.88 (d,  $J = 7.1$  Hz, 3H), 0.84 (s, 3H), 0.79 (d,  $J = 6.9$  Hz, 3H), 0.66 (s, 3H)

**$^{13}\text{C NMR}$**  (150 MHz,  $\text{CDCl}_3$ )  $\delta$  177.1, 140.6, 118.3, 101.0, 76.7, 49.1, 48.8, 47.9, 43.3, 39.7, 39.2, 34.3, 33.3, 32.4, 31.4, 31.3, 29.7, 28.0, 26.3, 25.4, 24.5, 23.1, 22.9, 22.3, 20.9, 17.3, 15.6, 11.1

**IR** (thin film) 2952, 2920, 2867, 1788, 1455, 1384, 1168, 1091, 1015, 970, 945

**HRMS** (ESI) calculated for  $\text{C}_{28}\text{H}_{46}\text{O}_3\text{Na}$  ( $\text{M}+\text{Na}$ )<sup>+</sup> 453.3345, observed 453.3342

**Optical Rotation**  $[\alpha]^{22.2}_{\text{D}} +27.4$ ,  $[\alpha]^{22.3}_{577} +28.3$ ,  $[\alpha]^{22.3}_{546} +29.0$ ,  $[\alpha]^{22.4}_{435} +39.9$ ,  $[\alpha]^{22.4}_{405} +46.5$  ( $c = 0.75$ ,  $\text{CHCl}_3$ )

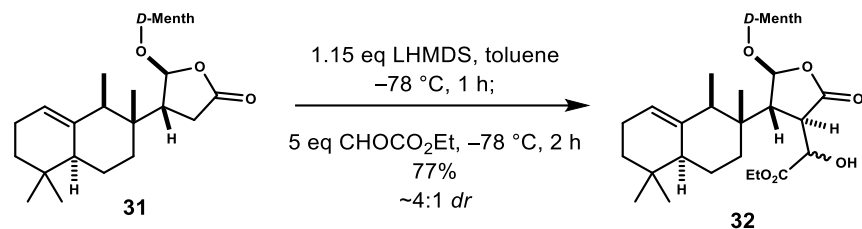

**Preparation of Alcohols 32:** A flame dried 100 mL round-bottom flask was charged with lactone **31** (712 mg, 1.65 mmol) and toluene (17 mL, 0.1 M). The solution was cooled to  $-78\text{ }^{\circ}\text{C}$  and a solution of LHMDS (2.5 mL, 2.5 mmol, 1.5 eq, 1 M in THF) was added dropwise. The reaction was maintained at  $-78\text{ }^{\circ}\text{C}$  for 1 h. During the enolate formation, ethyl glyoxylate (50 wt% in toluene) was distilled over  $\text{P}_2\text{O}_5$  under argon (10–15 min at  $110\text{ }^{\circ}\text{C}$ , warm to  $140\text{ }^{\circ}\text{C}$  over 10 min, and then warm to  $200\text{ }^{\circ}\text{C}$ ); the obtained yellow distillate was used immediately. The freshly distilled ethyl glyoxylate (1.6 mL, 8.2 mmol, 5 eq) was added dropwise to the cold enolate solution. The reaction mixture was maintained at  $-78\text{ }^{\circ}\text{C}$  for 2 h and then quenched by the addition of  $\text{H}_2\text{O}$  (20 mL) and allowed to warm to rt. The layers were separated and the aqueous layer was extracted with EtOAc (3 x 20 mL). The combined organic layers were washed with brine (40 mL) and dried over  $\text{MgSO}_4$ . After filtration, concentration of the filtrate gave a yellow oil, which was purified immediately by flash column chromatography ( $\text{SiO}_2$ , 20:1  $\rightarrow$  9:1 Hex/EtOAc)<sup>8</sup> to afford alcohols **32** (678 mg, 77%) as a colorless oil and an inseparable ~4:1 mixture of alcohol epimers.  $R_f = 0.3$  (9:1 Hex/EtOAc, visualized with  $\text{KMnO}_4$ ).

**$^1\text{H NMR}$**  (600 MHz,  $\text{CDCl}_3$ )  $\delta$  5.67 (m, 0.2H, minor), 5.66 (d,  $J = 2.6$  Hz, 0.8H, major), 5.37-5.34 (m, 0.8H, major), 5.34-5.31 (m, 0.2H, minor), 4.66 (dd,  $J = 3.7, 9.7$  Hz, 0.2H, minor), 4.40-4.30 (m, 1.6H, major), 4.30-4.25 (m, 0.2H, minor), 4.24 (dd,  $J = 3.2, 4.4$  Hz, 0.8H, major), 4.14-4.05 (m, 0.2H, minor), 3.52 (dt,  $J = 4.0, 10.8$  Hz, 1H), 3.27 (d,  $J = 9.7$  Hz, 0.2H, minor), 3.23 (d,  $J = 4.7$  Hz, 0.8H, major), 3.08 (dd,  $J = 3.0, 6.0$  Hz, 0.8H, major), 2.84 (app t,  $J = 3.3$  Hz, 0.2H, minor), 2.64 (dd,  $J = 2.6, 6.0$  Hz, 0.8H, major), 2.39 (app d,  $J = 2.8$  Hz, 0.2H, minor), 2.24-2.15 (m, 1H), 2.10-2.00 (m, 4H), 1.75-1.70 (m, 1H), 1.69-1.60 (m, 3H), 1.53-1.46 (m, 2H), 1.41-1.31 (m, 3.6H), 1.34 (t,  $J = 7.1$  Hz, 2.4H, major), 1.31-1.12 (m, 4.4H), 1.29 (t,  $J = 7.2$  Hz, 0.6H, minor), 0.99 (d,  $J = 6.7$  Hz, 3H), 0.95-0.90 (m, 6H), 0.87 (d,  $J = 7.1$  Hz, 3H), 0.85 (s, 2.4H, major), 0.83 (s, 0.6H, minor), 0.73 (s, 2.4H, major), 0.55 (s, 0.6H, minor)

**$^{13}\text{C NMR}$**  (150 MHz,  $\text{CDCl}_3$ )  $\delta$  (only major listed) 175.0, 172.5, 140.3, 118.6, 103.3, 100.2, 77.5, 71.2, 62.5, 51.2, 49.1, 47.9, 46.3, 43.2, 40.0, 39.5, 34.4, 33.3, 32.6, 31.5, 31.4, 28.0, 26.4, 25.0, 24.5, 23.0, 22.4, 21.0, 17.3, 15.5, 14.2, 11.3

**IR** (thin film) 3500, 2952, 2920, 2868, 1775, 1738, 1662, 1454, 1382, 1369, 1320, 1297, 1266, 1239, 1180, 1114, 1097, 945, 732

**HRMS** (ESI) calculated for  $[\text{C}_{32}\text{H}_{52}\text{NaO}_6]^+$  (M) 555.3661, observed 555.3676

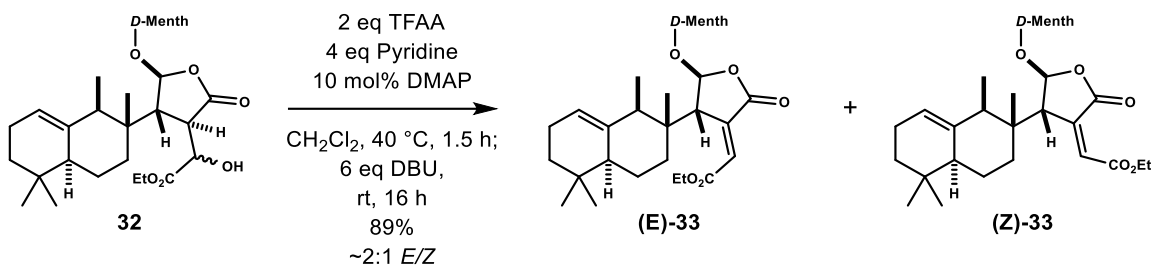

**Preparation of Alkenes (*E*)-33 and (*Z*)-33:** A 15 mL round-bottom flask containing a stir bar was charged with the mixture of alcohol epimers **32** (678 mg, 1.27 mmol), DMAP (19 mg, 0.15 mmol, ~10 mol %) and CH<sub>2</sub>Cl<sub>2</sub> (13 mL, 0. M) under argon. After sequential addition of pyridine (0.42 mL, 5.2 mmol, 4 eq) and trifluoroacetic anhydride (0.36 mL, 2.6 mmol, 2 eq), the reaction mixture was maintained at 40 °C for 1.5 h at which time complete consumption of the starting material was observed by TLC analysis. After this time, DBU (1.1 mL, 7.7 mmol, 6 eq) was added by syringe and the reaction mixture was stirred at rt for 16 h. The reaction mixture was then quenched by the addition of H<sub>2</sub>O (10 mL) and the layers were separated. The aqueous layer was extracted with CH<sub>2</sub>Cl<sub>2</sub> (3 x 20 mL) and the combined organic layers were washed with 1 M HCl (10 mL), dried over MgSO<sub>4</sub>, filtered, and concentrated under reduced pressure. The orange residue was purified by flash column chromatography (SiO<sub>2</sub>, 1:0→30:1→20:1 Hex/EtOAc) to provide (*E*)-**33** (375 mg, 0.73 mmol, 57%) as a colorless foam: *R*<sub>f</sub> = 0.65 (4:1 Hexanes/EtOAc, visualized with KMnO<sub>4</sub>) and (*Z*)-**33** (206 mg, 0.40 mmol, 32%) as a colorless oil: *R*<sub>f</sub> = 0.40 (4:1 Hexanes/EtOAc).

### (*E*)-33

<sup>1</sup>H NMR (600 MHz, CDCl<sub>3</sub>) δ 6.84 (d, *J* = 1.7 Hz, 1H), 5.79 (s, 1H), 5.34 (bs, 1H), 4.27-4.19 (m, 2H), 3.82 (d, *J* = 1.6 Hz, 1H), 3.51 (dt, *J* = 4.2, 10.7 Hz, 1H), 2.28-2.24 (m, 1H), 2.06-2.01 (m, 3H), 1.94-1.89 (m, 1H), 1.67-1.58 (m, 4H), 1.50-1.47 (m, 1H), 1.40-1.28 (m, 4H), 1.30 (t, *J* = 7.1 Hz, 3H), 1.22-1.13 (m, 4H), 1.03 (d, *J* = 7.0 Hz, 3H), 1.01-0.95 (m, 1H), 0.93 (d, *J* = 6.6 Hz, 3H), 0.88 (s, 3H), 0.82 (d, *J* = 7.0 Hz, 3H), 0.80 (s, 3H), 0.72 (d, *J* = 6.9 Hz, 3H), 0.67 (s, 3H)

<sup>13</sup>C NMR (150 MHz, CDCl<sub>3</sub>) δ 170.6, 165.4, 143.2, 140.4, 127.0, 118.6, 100.1, 77.1, 61.1, 51.8, 49.2, 47.5, 43.7, 43.6, 39.8, 34.3, 33.7, 33.4, 31.4, 31.3, 28.0, 26.2, 25.3, 24.2, 23.2, 22.9, 22.3, 20.8, 16.0, 15.6, 14.2, 11.4

IR (thin film) 2952, 2920, 2850, 1777, 1727, 1455, 1370, 1254, 1209, 1111, 1026, 918

HRMS (ESI) calculated for [C<sub>32</sub>H<sub>50</sub>NaO<sub>5</sub>]<sup>+</sup> (M) 537.3556, observed 537.3576

Optical Rotation [α]<sup>21.0</sup><sub>D</sub> +0.7, [α]<sup>21.1</sup><sub>577</sub> +0.4, [α]<sup>21.3</sup><sub>546</sub> -0.8, [α]<sup>21.4</sup><sub>435</sub> -12.8, [α]<sup>21.3</sup><sub>405</sub> -20.9 (*c* = 1.0, CHCl<sub>3</sub>)

### (*Z*)-33

<sup>1</sup>H NMR (600 MHz, CDCl<sub>3</sub>) δ 6.28 (d, *J* = 1.6 Hz, 1H), 5.72 (s, 1H), 5.35 (bs, 1H), 4.33-4.22 (m, 2H), 3.55 (dt, *J* = 4.2, 10.7 Hz, 1H), 2.87 (d, *J* = 1.3 Hz, 1H), 2.21 (q, *J* = 6.6 Hz, 1H), 2.09-1.98 (m, 4H), 1.69-1.57 (m, 4H), 1.51-1.46 (m, 1H), 1.40-1.26 (m, 4H), 1.31 (t, *J* = 7.1 Hz, 3H), 1.26-



1.10 (m, 4H), 1.03-0.97 (m, 1H), 0.95 (d,  $J = 7.0$  Hz, 3H), 0.93 (d,  $J = 6.5$  Hz, 3H), 0.89 (s, 3H), 0.85 (d,  $J = 7.1$  Hz, 3H), 0.82 (s, 3H), 0.81 (s, 3H), 0.76 (d,  $J = 6.9$  Hz, 3H)

$^{13}\text{C}$  NMR (150 MHz,  $\text{CDCl}_3$ )  $\delta$  167.3, 165.3, 140.3, 134.9, 129.7, 118.8, 98.6, 76.7, 61.5, 54.8, 49.1, 47.8, 43.3, 41.2, 39.7, 34.3, 33.42, 33.39, 31.41, 31.39, 28.0, 26.2, 25.4, 24.3, 23.2, 22.9, 22.3, 20.9, 16.6, 15.7, 13.9, 11.2

IR (thin film) 2954, 2922, 2867, 1775, 1733, 1667, 1455, 1367, 1325, 1241, 1180, 1087, 1029, 933

HRMS (ESI) calculated for  $[\text{C}_{32}\text{H}_{50}\text{NaO}_5]^+$  (M) 537.3556, observed 537.3576

Optical Rotation  $[\alpha]^{22.1}_{\text{D}} +27.3$ ,  $[\alpha]^{22.1}_{577} +28.4$ ,  $[\alpha]^{21.7}_{546} +30.9$ ,  $[\alpha]^{21.7}_{435} +52.4$ ,  $[\alpha]^{22.2}_{405} +64.2$   
( $c = 1.0$ ,  $\text{CHCl}_3$ )

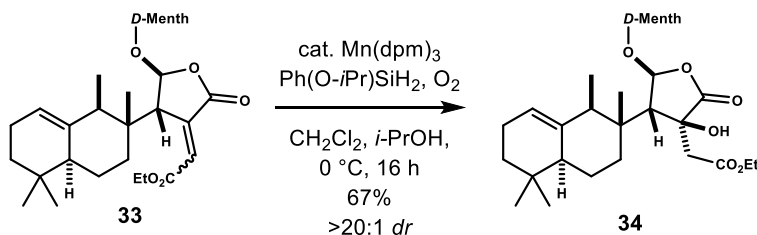

**Preparation of Tertiary Alcohol 34:**<sup>9</sup> A 50 mL round-bottom flask was charged with alkenes **33** (103 mg, 0.20 mmol) and  $\text{Mn(dpm)}_3$  (12 mg, 0.02 mmol, 10 mol%) dissolved in 1:1  $\text{CH}_2\text{Cl}_2/i\text{PrOH}$  (20 mL, 0.01 M) at 0 °C. The system was then sparged with oxygen for 10 min. Then  $\text{Ph(O-}i\text{Pr)SiH}_2$  (0.07 mL, 0.3898 mmol, ~2 eq) in  $\text{CH}_2\text{Cl}_2$  (0.5 mL) was added via syringe pump over 1 h while sparging continued. The reaction was then allowed to slowly warm to rt overnight (16 h). The reaction mixture was then quenched with saturated  $\text{Na}_2\text{S}_2\text{O}_3$  (10 mL) and stirred for 10 min. The reaction mixture was then diluted with  $\text{H}_2\text{O}$  (30 mL) and extracted with  $\text{EtOAc}$  (3 x 20 mL). The organic layers were then dried over  $\text{MgSO}_4$ , filtered, and concentrated to a brown oil. The residue was then purified by flash column chromatography ( $\text{SiO}_2$ , 1:0→9:1→4:1 Hex/ $\text{EtOAc}$ ) to afford alcohol **34** (71.5 mg, 67%) as a colorless oil:  $R_f = 0.3$  (9:1 Hex/ $\text{EtOAc}$ , visualized with  $\text{KMnO}_4$ ).

**$^1\text{H NMR}$**  (600 MHz,  $\text{CDCl}_3$ )  $\delta$  5.78 (d,  $J = 5.4$  Hz, 1H), 5.33 (broad s, 1H), 4.79 (s, 1H), 4.26-4.13 (m, 2H), 3.61 (dt,  $J = 3.4, 10.4$  Hz, 1H), 2.89 (d,  $J = 15.4$  Hz, 1H), 2.78 (d,  $J = 15.4$  Hz, 1H), 2.69 (d,  $J = 5.2$  Hz, 1H), 2.36-2.29 (m, 1H), 2.22-2.10 (m, 2H), 2.06-1.98 (m, 2H), 1.70-1.62 (m, 3H), 1.61-1.56 (m, 2H), 1.53-1.49 (m, 1H), 1.45-1.31 (m, 4H), 1.28 (t,  $J = 7.1$  Hz, 3H), 1.25-1.20 (m, 2H), 1.20-1.14 (m, 1H), 1.03-0.98 (m, 1H), 0.97-0.92 (m, 6H), 0.91 (s, 3H), 0.89 (s, 3H), 0.88 (d,  $J = 6.7$  Hz, 3H), 0.83 (s, 3H), 0.79 (d,  $J = 6.7$  Hz, 3H)

**$^{13}\text{C NMR}$**  (125 MHz,  $\text{CDCl}_3$ )  $\delta$  175.3, 170.9, 140.3, 118.9, 99.6, 78.3, 76.8, 61.5, 56.7, 49.4, 47.8, 44.8, 39.9, 39.5, 39.0, 34.7, 34.2, 33.3, 31.5, 31.3, 28.0, 26.2, 25.3, 24.7, 23.0, 22.9, 22.3, 21.0, 16.7, 15.7, 14.0, 11.6

**IR** (thin film) 3457, 2950, 2920, 2867, 1778, 1734, 1453, 1370, 1333, 1201, 1153, 1137, 1035, 919, 733

**HRMS** (ESI) calculated for  $[\text{C}_{32}\text{H}_{52}\text{NaO}_6]^+$  (M+Na) 555.3661, observed 555.3665

**Optical Rotation**  $[\alpha]^{22.3}_D +37.9$ ,  $[\alpha]^{22.4}_{577} +39.5$ ,  $[\alpha]^{22.5}_{546} +44.4$ ,  $[\alpha]^{22.6}_{435} +68.2$ ,  $[\alpha]^{22.6}_{405} +79.5$  ( $c = 1.0$ ,  $\text{CHCl}_3$ )

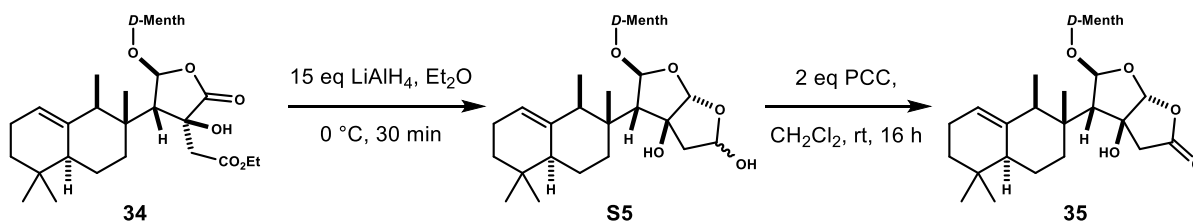

**Preparation of Dioxabicyclo[3.3.0]octan-3-one 35:** A 10 mL round-bottom flask was charged with lactone **34** (14.2 mg, 0.0266 mmol), which was dissolved in Et<sub>2</sub>O (5 mL, 0.005 M) and cooled to 0 °C. Solid LiAlH<sub>4</sub> (16 mg, 0.43 mmol, 15 eq) was added in one portion. The mixture was then allowed to stir at 0 °C for 30 min and then quenched by the Fieser method (0.02 mL of H<sub>2</sub>O, then 0.02 mL of 15% aqueous NaOH, then 0.06 mL of H<sub>2</sub>O). The mixture was then warmed to rt and stirred for 1 h or until the residual gray color of LiAlH<sub>4</sub> had been fully converted to colorless solids. Then MgSO<sub>4</sub> was added and the mixture was filtered. The filtered solids were washed with Et<sub>2</sub>O (30 mL) and the filtrate was concentrated to afford **S5**, a mixture of lactol epimers, as a colorless foam, which was carried on without further purification.

A 10 mL round-bottom flask was charged with the crude lactols **S5** and dissolved in CH<sub>2</sub>Cl<sub>2</sub> (5 mL, 0.005 M) at rt. PCC (12mg, 0.056 mmol, 2.1 eq) was then added to the reaction and the mixture was stirred at rt overnight (~16 h). Celite (100 mg) was then added to the reaction and the mixture was concentrated. The solids were then suspended in 4:1 hexanes/EtOAc (10 mL) and filtered through a SiO<sub>2</sub> plug, which was washed with 4:1 hexanes/EtOAc (30 mL). The filtrate was then concentrated to afford lactone **35** (9.4 mg, 72%) as a colorless oil, which was used without further purification: R<sub>f</sub> = 0.3 (9:1 Hex/EtOAc, visualized with KMnO<sub>4</sub>).

**<sup>1</sup>H NMR** (600 MHz, CDCl<sub>3</sub>) 5.61 (s, 1H), 5.46 (d, *J* = 5.8 Hz, 1H), 5.33-5.28 (m, 1H), 3.54 (dt, *J* = 3.9, 10.5 Hz, 1H), 3.09 (d, *J* = 17.5 Hz, 1H), 2.55 (d, *J* = 17.5 Hz, 1H), 2.55 (d, *J* = 5.9 Hz, 1H), 2.20-2.11 (m, 2H), 2.10-2.05 (m, 1H), 2.05-1.98 (m, 2H), 1.74-1.69 (m, 1H), 1.68-1.65 (m, 1H), 1.65-1.62 (m, 2H), 1.62-1.60 (m, 1H), 1.43 (s, 1H), 1.40-1.32 (m, 3H), 1.29-1.24 (m, 3H), 1.23-1.20 (m, 1H), 1.20-1.18 (m, 1H), 1.18-1.13 (m, 1H), 1.03-0.98 (m, 1H), 0.96 (d, *J* = 6.7 Hz, 3H), 0.92 (d, *J* = 6.7 Hz, 3H), 0.90 (d, *J* = 7.2 Hz, 3H), 0.89 (s, 3H), 0.88 (s, 3H), 0.84 (s, 3H), 0.82 (d, *J* = 6.9 Hz, 3H)

**<sup>13</sup>C NMR** (150 MHz, CDCl<sub>3</sub>) δ 174.7, 140.4, 118.3, 108.8, 100.0, 83.6, 76.2, 58.4, 49.4, 47.9, 44.5, 40.0, 39.7, 38.6, 35.3, 34.4, 32.7, 31.4, 31.2, 27.7, 26.8, 25.7, 25.2, 23.2, 23.0, 22.3, 21.0, 18.0, 15.8, 11.6

**IR** (thin film) 3403, 2921, 2867, 1792, 1455, 1383, 1219, 1163, 1104, 1035, 924, 772

**HRMS** (ESI) calculated for [C<sub>30</sub>H<sub>48</sub>O<sub>5</sub>Na]<sup>+</sup> (M+Na) 511.3399, observed 511.3399

**Optical Rotation** [α]<sup>22.7</sup><sub>D</sub> +23.7, [α]<sup>22.8</sup><sub>577</sub> +24.4, [α]<sup>22.8</sup><sub>546</sub> +24.4, [α]<sup>22.8</sup><sub>435</sub> +34.3, [α]<sup>22.8</sup><sub>405</sub> +39.7 (*c* = 0.6, CHCl<sub>3</sub>)

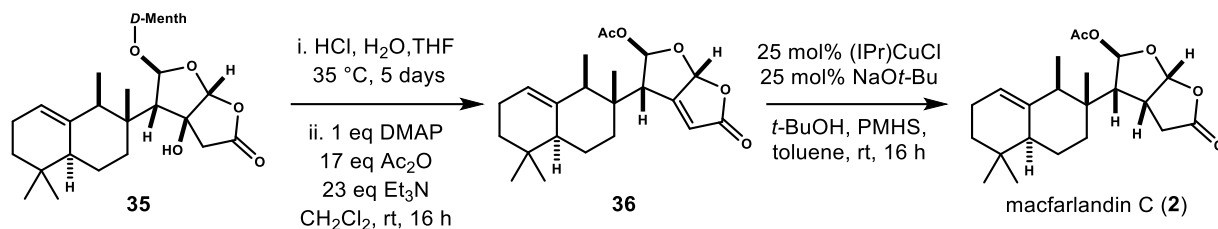

**Preparation of (–)-macfarlandin C (2):** Aqueous HCl (4 M, 1.5 mL, 0.06 M overall) was added to a solution of acetal **35** (9.1 mg, 0.019 mmol) in THF (1.5 mL). The reaction was then warmed to 35 °C and stirred at this temperature for 5 days. The reaction was then cooled to rt and diluted with H<sub>2</sub>O (5 mL) and extracted with EtOAc (3 x 5 mL). The combined organic extracts were dried over MgSO<sub>4</sub> and filtered. The filtrate was concentrated to afford the intermediate lactol alcohol as a pale-yellow oil, which was carried on without further purification.

The crude lactol alcohol was dissolved in CH<sub>2</sub>Cl<sub>2</sub> (3 mL, 0.06 M) and DMAP (2.2 mg, 0.019 mmol, 1 eq) and Et<sub>3</sub>N (0.06 mL, 0.4 mmol, 23 eq) were added, followed by Ac<sub>2</sub>O (0.03 mL, 0.3 mmol, 17 eq). The reaction was then stirred at rt overnight (~16 h) and then quenched by the addition of H<sub>2</sub>O (5 mL) and saturated aq. NaHCO<sub>3</sub> (5 mL). The mixture was then extracted with CH<sub>2</sub>Cl<sub>2</sub> (3 x 5 mL) and the combined organic extracts were dried over MgSO<sub>4</sub>. Filtration and concentration of the filtrate gave a yellowish solid. This residue was taken up in 4:1 hexanes/EtOAc (5 mL) and flushed through a SiO<sub>2</sub> plug (neutralized with 10 mL of 5% Et<sub>3</sub>N in Hexanes) with 25 mL of 4:1 hexanes/EtOAc. The filtrate was then concentrated to afford butenolide **36** as a pale-yellow oil, which was used immediately without further purification.<sup>10</sup>

A flame-dried 10 mL flask was charged with (IPr)CuCl (2.2 mg, 0.0046 mmol, 25 mol%) and toluene (0.5 mL). To this solution, NaOtBu (2.3 μL, 2M in THF, 0.0046 mmol, 25 mol%) was added followed by PMHS (3.3 μL, 16.66M neat, 0.0558 mmol, 3 eq). The resulting yellow solution was stirred at rt for 5 min. Then crude butenolide **36** and *t*BuOH (3.5 μL, 0.0372 mmol, 2 eq) as a solution in toluene (1.5 mL, 0.01 M final concentration) were added to the reaction. The mixture was then stirred at rt overnight (~16 h). The reaction was then quenched with H<sub>2</sub>O (5 mL) and vigorously stirred for 5 min. The mixture was then diluted with brine (5 mL) and poured into a separatory funnel. The mixture was extracted with EtOAc (3 x 10 mL). The organic layers were then dried over MgSO<sub>4</sub>, filtered, and concentrated to a green oil. The residue was then purified by preparative TLC (SiO<sub>2</sub>, 4:1 Hex/EtOAc) to afford (–)-macfarlandin C (**2**) (2.7 mg, 38% over three steps) as a colorless solid: R<sub>f</sub> = 0.29 (4:1 Hex/EtOAc, visualized with KMnO<sub>4</sub>).<sup>11</sup>

**<sup>1</sup>H NMR** (600 MHz, CDCl<sub>3</sub>) δ 6.53 (d, *J* = 7.3 Hz, 1H), 6.04 (d, *J* = 4.1 Hz, 1H), 5.31 (br. t, *J* = 3.7 Hz, 1H), 3.06-3.00 (m, 1H), 2.81 (app t, *J* = 6.8 Hz, 1H), 2.74 (dd, *J* = 10.4, 17.4 Hz, 1H), 2.55 (dd, *J* = 8.9, 17.4 Hz, 1H), 2.09 (s, 3H), 2.05-1.98 (m, 2H), 1.89 (bq, *J* = 7.0 Hz, 1H), 1.76-1.69 (m, 1H), 1.66-1.57 (m, 2H), 1.43-1.37 (m, 1H), 1.36-1.31 (m, 1H), 1.25-1.19 (m, 1H), 1.15 (dt, *J* = 4.8, 12.8 Hz, 1H), 1.00 (d, *J* = 6.8 Hz, 3H), 0.87 (s, 3H), 0.84 (s, 3H), 0.82 (s, 3H)

**<sup>13</sup>C NMR** (150 MHz, CDCl<sub>3</sub>) δ 175.4, 169.7, 140.3, 118.4, 104.8, 96.1, 51.7, 49.0, 44.4, 42.1, 39.7, 35.5, 32.6, 31.2, 30.2, 27.6, 26.8, 25.2, 23.0, 21.2, 18.9, 11.6

**IR** (thin film) 2921, 2851, 1799, 1750, 1455, 1375, 1225, 999

**HRMS** (ESI) calculated for  $[\text{C}_{22}\text{H}_{32}\text{O}_5\text{Na}]^+$  ( $\text{M}+\text{Na}$ )<sup>+</sup> 399.2148, observed 399.2159

**Optical Rotation**  $[\alpha]^{21.0}_{\text{D}} -27.7$ ,  $[\alpha]^{21.1}_{577} -29.5$ ,  $[\alpha]^{21.2}_{546} -43.1$ ,  $[\alpha]^{21.2}_{435} -112$ ,  $[\alpha]^{21.3}_{405} -125$  ( $c = 0.4$ ,  $\text{CHCl}_3$ );  $[\alpha]_{\text{D}} -29.1$  ( $c 0.75$ ,  $\text{CHCl}_3$ ) is reported for the natural isolate.<sup>12</sup>

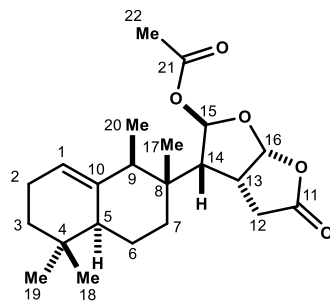

macfarlandin C

$^1\text{H}$  (600 MHz) and  $^{13}\text{C}$  (150 MHz) Solvent:  $\text{CDCl}_3$

| Atom | $^1\text{H}$ Shift Exp.  | $^1\text{H}$ Shift Lit. <sup>12</sup> | $^{13}\text{C}$ Shift Exp. | $^{13}\text{C}$ Shift Lit. <sup>12</sup> |
|------|--------------------------|---------------------------------------|----------------------------|------------------------------------------|
| 1    | 5.31 (br t, 4.0 Hz)      | 5.32 (br t, 4.0 Hz)                   | 118.4                      | 118.3                                    |
| 2    | 2.05-1.98 (m)            | 2.05 (m)                              | 23.0                       | 23.0                                     |
| 3a   | 1.36-1.31 (m, 1H)        | 1.36 (ddd, 13, 7.5, 6.9 Hz)           | 32.6                       | 32.6                                     |
| 3b   | 1.15 (dt, 4.8, 12.8 Hz)  | 1.16 (dt, 4.6, 13.0 Hz)               | 32.6                       | 32.6                                     |
| 4    | NA                       | NA                                    | 31.2                       | 31.2                                     |
| 5    | 1.43-1.37 (m)            | Not Reported                          | 49.0                       | 49.0                                     |
| 6a   | 1.76-1.69 (m)            | Not Reported                          | 25.2                       | 25.2                                     |
| 6b   | 1.25-1.19 (m)            | Not Reported                          | 25.2                       | 25.2                                     |
| 7    | 1.66-1.57 (m, 2H)        | Not Reported                          | 35.5                       | 35.4                                     |
| 8    | NA                       | NA                                    | 39.7                       | 39.6                                     |
| 9    | 1.89 (bq, 7.0 Hz)        | 1.90 (bq, 7.0 Hz)                     | 44.4                       | 44.4                                     |
| 10   | NA                       | NA                                    | 140.3                      | 140.2                                    |
| 11   | NA                       | NA                                    | 175.4                      | 175.3                                    |
| 12a  | 2.55 (dd, 8.9, 17.2 Hz)  | 2.56 (dd, 9.0, 17.3 Hz)               | 30.2                       | 30.2                                     |
| 12b  | 2.74 (dd, 10.4, 17.2 Hz) | 2.74, (dd, 10.4, 17.3 Hz)             | 30.2                       | 30.2                                     |
| 13   | 3.06-3.00 (m)            | 3.04 (m)                              | 42.1                       | 42.1                                     |
| 14   | 2.81 (t, 6.7 Hz)         | 2.81 (t, 6.6 Hz)                      | 51.7                       | 51.7                                     |
| 15   | 6.53 (d, 7.3 Hz)         | 6.52 (d, 6.6 Hz)                      | 104.8                      | 104.8                                    |
| 16   | 6.04 (d, 4.4 Hz)         | 6.04 (d, 4.0 Hz)                      | 96.1                       | 96.0                                     |
| 17   | 0.82 (s)                 | 0.82 (s)                              | 18.9                       | 18.9                                     |
| 18   | 0.84 (s)                 | 0.84 (s)                              | 26.8                       | 26.8                                     |
| 19   | 0.87 (s)                 | Not Reported                          | 27.6                       | 27.6                                     |
| 20   | 1.00 (d, 6.8 Hz)         | 1.01 (d, 7.0 Hz)                      | 11.6                       | 11.6                                     |
| 21   | NA                       | NA                                    | 169.7                      | 169.7                                    |
| 22   | 2.09 (s)                 | 2.10 (s)                              | 21.2                       | 21.1                                     |

## ORTEP Image of Mukaiyama Hydration Product 13

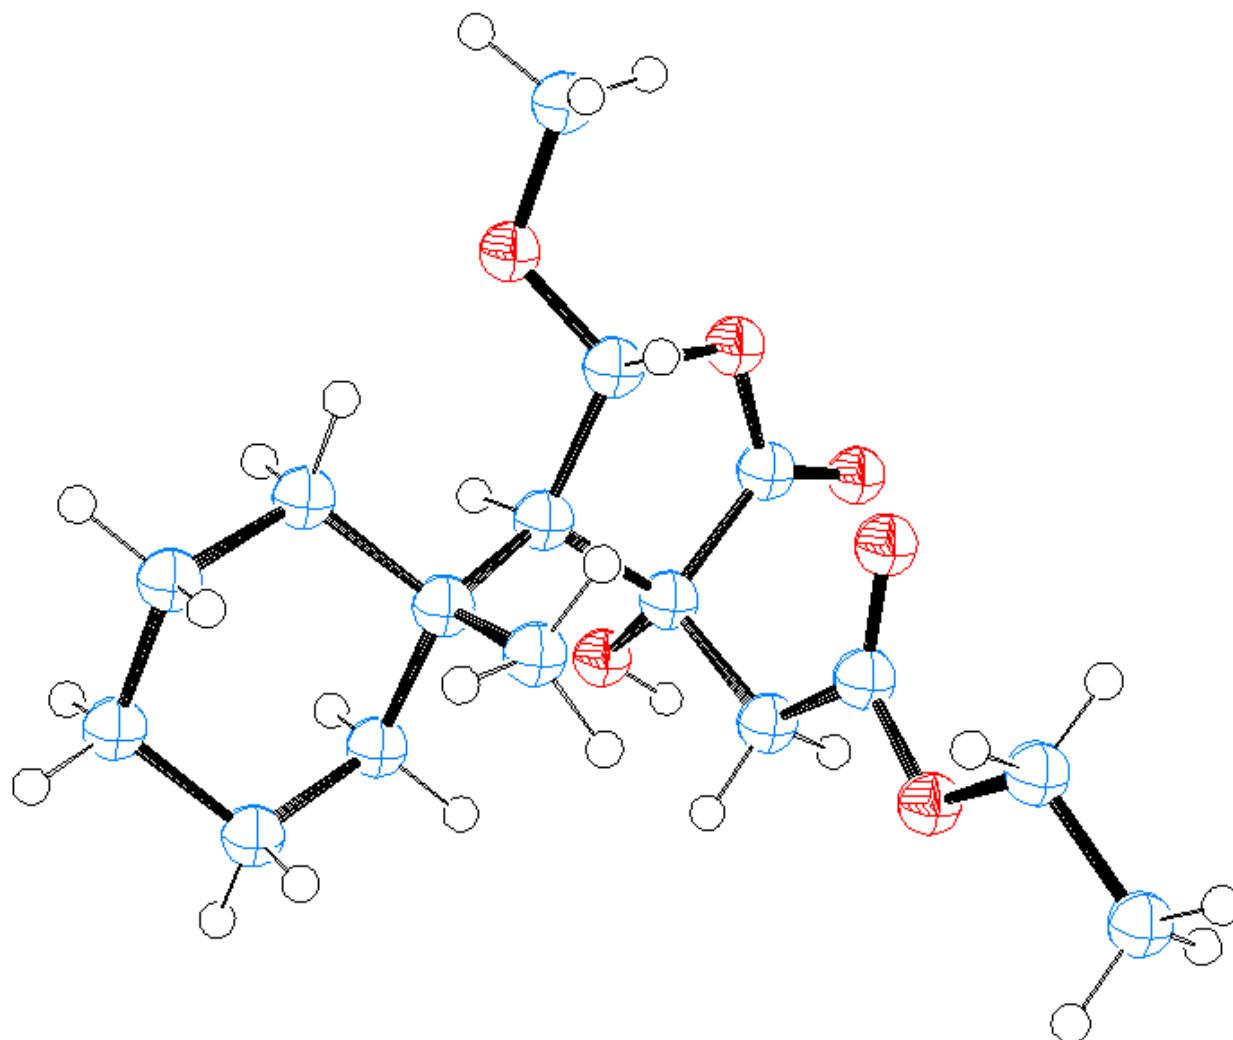

**Table S1.** Crystal data and structure refinement for Compound **13**.

|                      |                                                |                                |
|----------------------|------------------------------------------------|--------------------------------|
| Identification code  | leo298                                         |                                |
| Empirical formula    | C <sub>16</sub> H <sub>26</sub> O <sub>6</sub> |                                |
| Formula weight       | 314.37                                         |                                |
| Temperature          | 88(2) K                                        |                                |
| Wavelength           | 0.71073 Å                                      |                                |
| Crystal system       | Triclinic                                      |                                |
| Space group          | <i>P</i> $\bar{1}$                             |                                |
| Unit cell dimensions | $a = 9.0979(11)$ Å                             | $\alpha = 97.5790(15)^\circ$ . |
|                      | $b = 9.8102(12)$ Å                             | $\beta = 99.4092(15)^\circ$ .  |
|                      | $c = 18.733(2)$ Å                              | $\gamma = 92.7169(16)^\circ$ . |
| Volume               | 1631.0(3) Å <sup>3</sup>                       |                                |

|                                         |                                                               |
|-----------------------------------------|---------------------------------------------------------------|
| Z                                       | 4                                                             |
| Density (calculated)                    | 1.280 Mg/m <sup>3</sup>                                       |
| Absorption coefficient                  | 0.097 mm <sup>-1</sup>                                        |
| F(000)                                  | 680                                                           |
| Crystal color                           | colorless                                                     |
| Crystal size                            | 0.551 x 0.388 x 0.329 mm <sup>3</sup>                         |
| Theta range for data collection         | 2.099 to 29.010°                                              |
| Index ranges                            | -11 ≤ <i>h</i> ≤ 12, -13 ≤ <i>k</i> ≤ 13, -25 ≤ <i>l</i> ≤ 25 |
| Reflections collected                   | 18926                                                         |
| Independent reflections                 | 7953 [R(int) = 0.0243]                                        |
| Completeness to theta = 25.500°         | 99.6 %                                                        |
| Absorption correction                   | Semi-empirical from equivalents                               |
| Max. and min. transmission              | 0.8621 and 0.7658                                             |
| Refinement method                       | Full-matrix least-squares on F <sup>2</sup>                   |
| Data / restraints / parameters          | 7953 / 0 / 605                                                |
| Goodness-of-fit on F <sup>2</sup>       | 1.036                                                         |
| Final R indices [I > 2σ(I) = 6267 data] | R1 = 0.0394, wR2 = 0.1029                                     |
| R indices (all data, 0.73 Å)            | R1 = 0.0526, wR2 = 0.1136                                     |
| Largest diff. peak and hole             | 0.411 and -0.272 e.Å <sup>-3</sup>                            |



**Table S2:** Summary of Unsuccessful HAT Hydrogenation Conditions for the Conversion of **S1** to **S6/S7**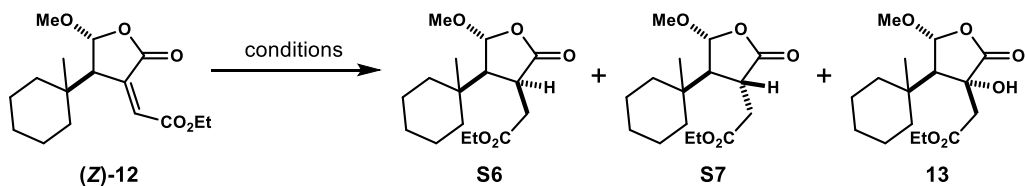

| Conditions <sup>9,3-16</sup>                                                                                                                   | Yield <sup>a,b</sup> | <i>dr</i> (S6:S7) <sup>c</sup> |
|------------------------------------------------------------------------------------------------------------------------------------------------|----------------------|--------------------------------|
| CoCl <sub>2</sub> ·6H <sub>2</sub> O (1 eq), NaBH <sub>4</sub> (2 eq), EtOH (0.1 M), 0 °C, 3 h                                                 | 27% (0%)             | 1:8                            |
| Co(acac) <sub>2</sub> (1 eq), <i>t</i> -BuOOH (3 eq), Et <sub>3</sub> SiH (10 eq), 1,4-cyclohexadiene (10 eq), <i>i</i> -PrOH (0.1 M), rt, 3 h | 10% (8%)             | 1:2                            |
| Co(dpm) <sub>2</sub> (10 mol%), PhSiH <sub>3</sub> (3 eq), <i>t</i> -BuOOH (3 eq), PhCF <sub>3</sub> (0.1 M), rt, 18 h                         | 0% (50%)             | –                              |
| Mn(dpm) <sub>3</sub> (3 mol%), PhSiH <sub>3</sub> (1.5 eq), CH <sub>2</sub> Cl <sub>2</sub> / <i>i</i> -PrOH (4:1, 0.1 M) rt, 18 h             | 80% (15%)            | 1:7                            |
| Mn(dpm) <sub>3</sub> (10 mol%), PhSiH <sub>3</sub> (3 eq), <i>t</i> -BuOOH (3 eq), <i>i</i> -PrOH (0.1 M), rt, 18 h                            | 40% (12%)            | 1:1                            |
| Mn(dpm) <sub>3</sub> (3 mol%), Ph( <i>Oi</i> -Pr)SiH <sub>2</sub> (3 eq), <i>t</i> -BuOOH (3 eq), hexanes (0.1 M), rt, 18 h                    | 24% (8%)             | 1:2                            |

<sup>a</sup>Determined by <sup>1</sup>H NMR integration relative to an internal standard (1,2-dibromo-4,5-methylenedioxybenzene).

<sup>b</sup>Yield of hydration byproduct shown in parentheses, only one diastereomer observable by <sup>1</sup>H NMR

<sup>c</sup>Diastereomeric ratio determined by comparing integrations of acetal proton

## References:

1. Slutsky, Y.; Jamison, C.R.; Zhao, P.; Lee, J.; Rhee, Y.H.; Overman, L. E. *J. Am. Chem. Soc.* **2017**, *139*, 7192–7195.
2. Garnsey, M.R.; Slutsky, Y.; Jamison, C.R.; Zhao, P.; Lee, J.; Rhee, Y.H.; Overman, L. E. *J. Org. Chem.* **2018**, *83*, 6958–6976.
3. Bovonsombat, P.; Angara, G. J.; McNelis, E. *Tetrahedron Lett.* **1994**, *35*, 6787–6790.
4. Kamatani, A.; Overman, L. E. *Org. Lett.* **2001**, *3*, 1229 – 1232.
5. Soorukram, D.; Knochel, P. *Org. Lett.* **2004**, *6*, 2409–2411.
6. Dess, D. B.; Martin, J. C. *J. Org. Chem.* **1983**, *48*, 4155 – 4156.
7. Maruoka, K.; Itoh, T.; Yamamoto, H. *J. Am. Chem. Soc.* **1985**, *107*, 4573 – 4576.
8. Residual glyoxylate in the crude product leads to incorporation of desired aldol product into polymeric glyoxylate resulting in lower yields of **32**.
9. Obradors, C.; Martinez, R. M.; Shenvi, R. A. *J. Am. Chem. Soc.* **2016**, *138*, 4962 – 4971.
10. Butenolide **36** unstable when stored for extended periods of time; this instability is exacerbated by storage in chlorinated solvents or by dry loading on SiO<sub>2</sub> gel. The major observed decomposition product is a grease-like broad multiplet centered at 1.25 ppm in CDCl<sub>3</sub>.
11. Macfarlandin C decomposes under mildly acidic conditions such as prolonged exposure to silica gel or CDCl<sub>3</sub>, resulting in the growth of an inseparable decomposition product showing a diagnostic broad multiplet at 1.25 ppm (<sup>1</sup>H NMR, CDCl<sub>3</sub>) and peaks at 29.7, 29.4 and 14.1 ppm (<sup>13</sup>C NMR, CDCl<sub>3</sub>).
12. Molinski, T. F.; Faulkner, J.; He, C.; Van Duyne, G. D.; Clardy, J. *J. Org. Chem.* **1986**, *51*, 4564 – 4567.
13. Chung, S.K. *J. Org. Chem.* **1979**, *44*, 1014 – 1016.
14. Ma, X.; Herzon, S.B. *Chem. Sci.* **2015**, *6*, 6250 – 6255.
15. Iwasaki, K.; Wan, K.K.; Oppedisano, A.; Crossley, S.W.M.; Shenvi, R.A. *J. Am. Chem. Soc.* **2014**, *136*, 1300 – 1303.
16. Magnus, P.; Waring, M.J.; Scott, D.A. *Tetrahedron Lett.* **2000**, *41*, 9731 – 9733.

# **Spectral Data**

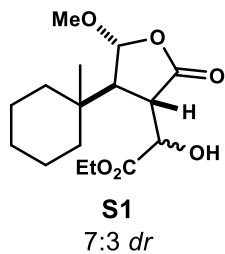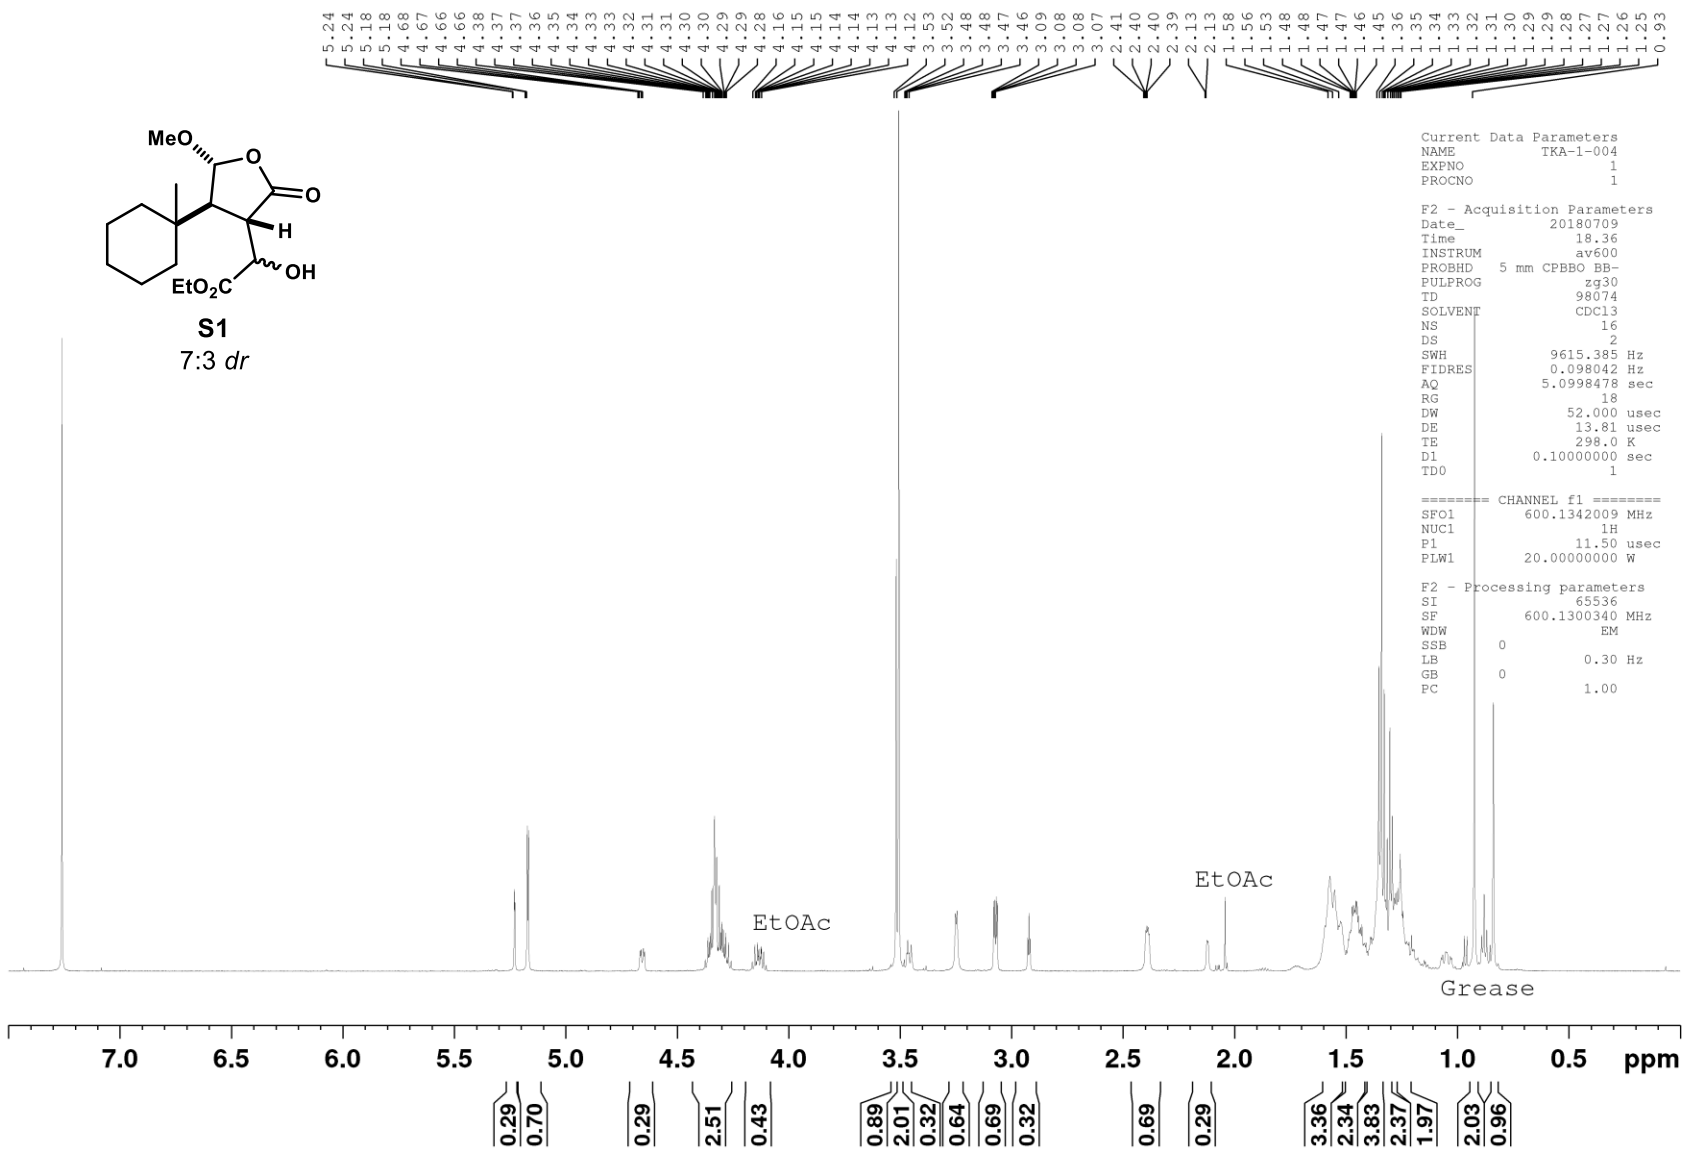

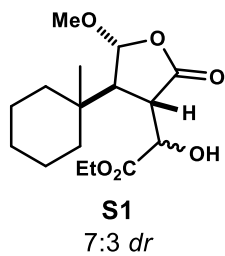

176.20  
174.64  
172.41  
172.35

105.97  
105.37

70.77  
70.58  
62.63  
62.05  
57.26  
56.87  
45.84  
45.46  
35.61  
35.45  
34.95  
34.64  
34.42  
33.98  
31.63  
29.75  
26.00  
25.94  
21.42  
21.38  
21.34  
21.32  
20.30  
19.52  
14.08  
14.06

```

Current Data Parameters
NAME      TRK-1-004
EXPNO     2
PROCNO    1

F2 - Acquisition Parameters
Date_     20180709
Time      18.46
INSTRUM   av600
PROBHD    5 mm CPBBO BB-
PULPROG   zgdc30
TD         65536
SOLVENT   CDCl3
NS         123
DS         4
SMH        36231.883 Hz
FIDRES     0.552855 Hz
AQ         0.9043968 sec
RG         2050
DW         13.800 usec
DE         18.01 usec
TE         298.0 K
D1         0.40000001 sec
D11        0.03000000 sec
TDO        1

----- CHANNEL f1 -----
SFO1      150.9194080 MHz
NUC1       13C
P1         9.60 usec
PLW1       64.00000000 W

----- CHANNEL f2 -----
SFO2      600.1330010 MHz
NUC2       1H
CPDPRG2    waltz16
PCPD2      80.00 usec
PLW2       20.00000000 W
PLW12      0.32734001 W

F2 - Processing parameters
SI         65536
SF         150.9028085 MHz
WDW        EM
SSB        0
LB         1.00 Hz
GB         0
FC         1.00
  
```

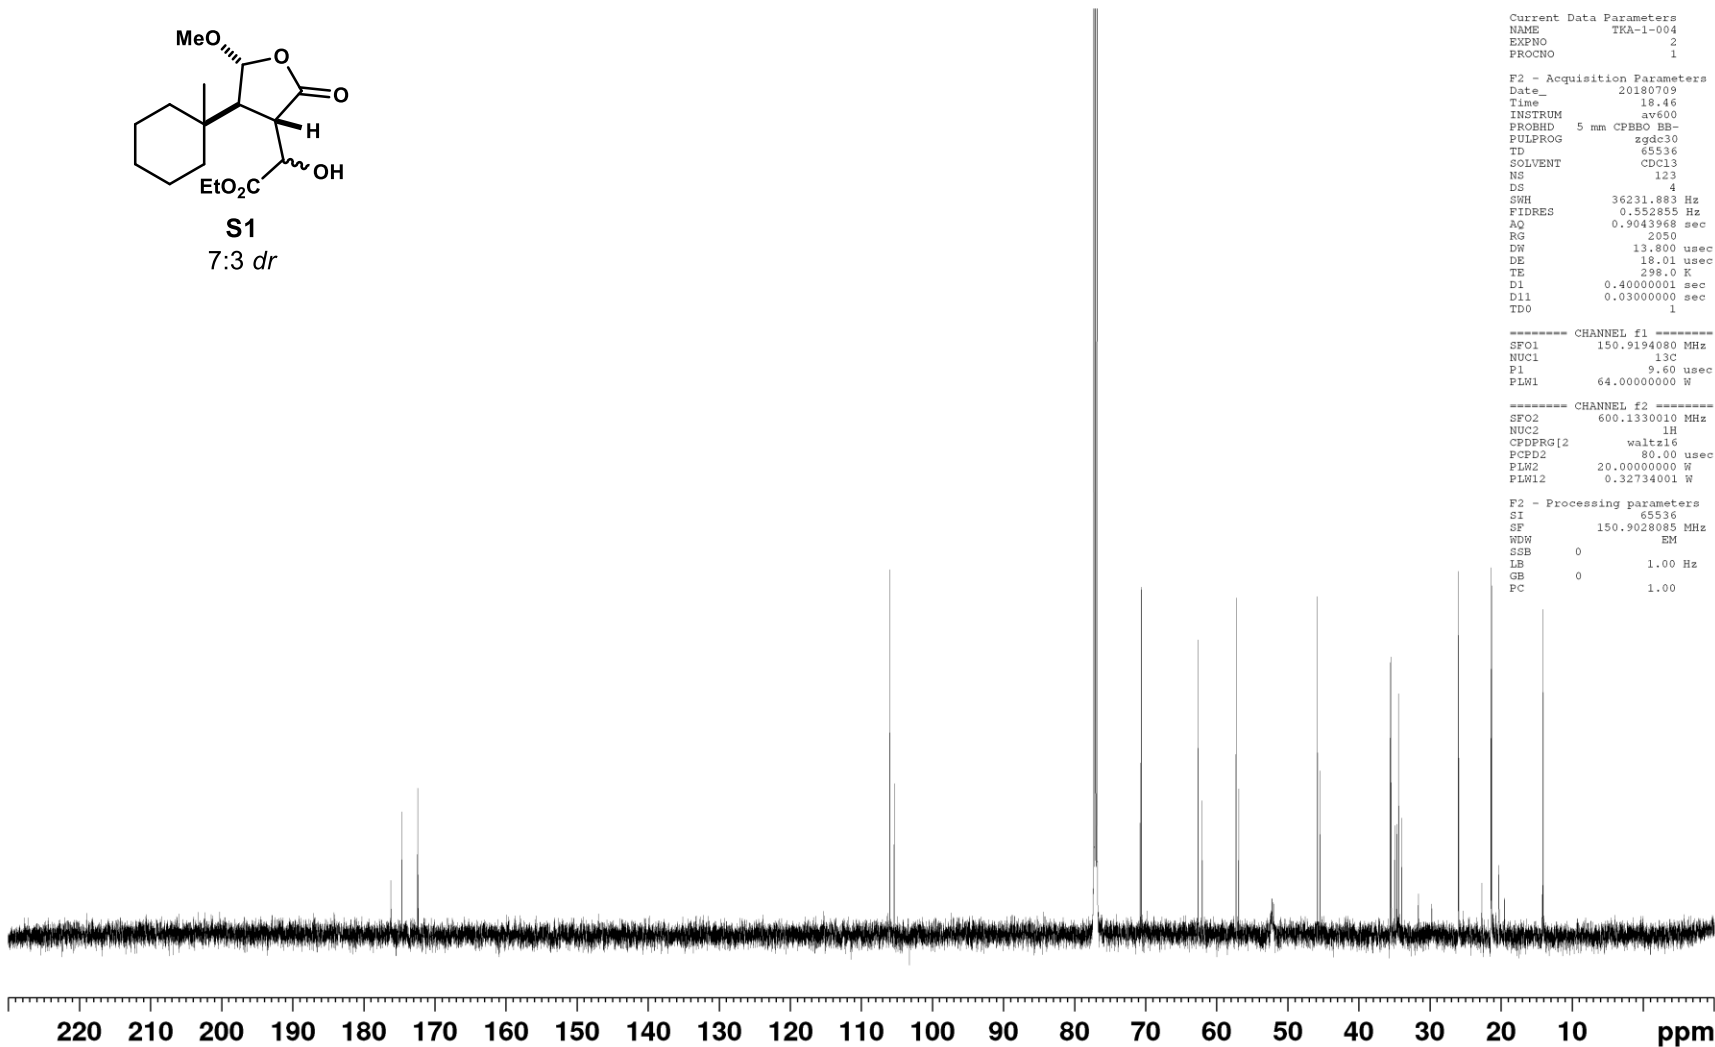

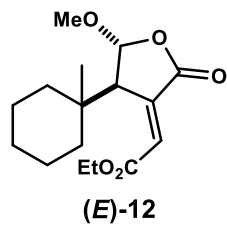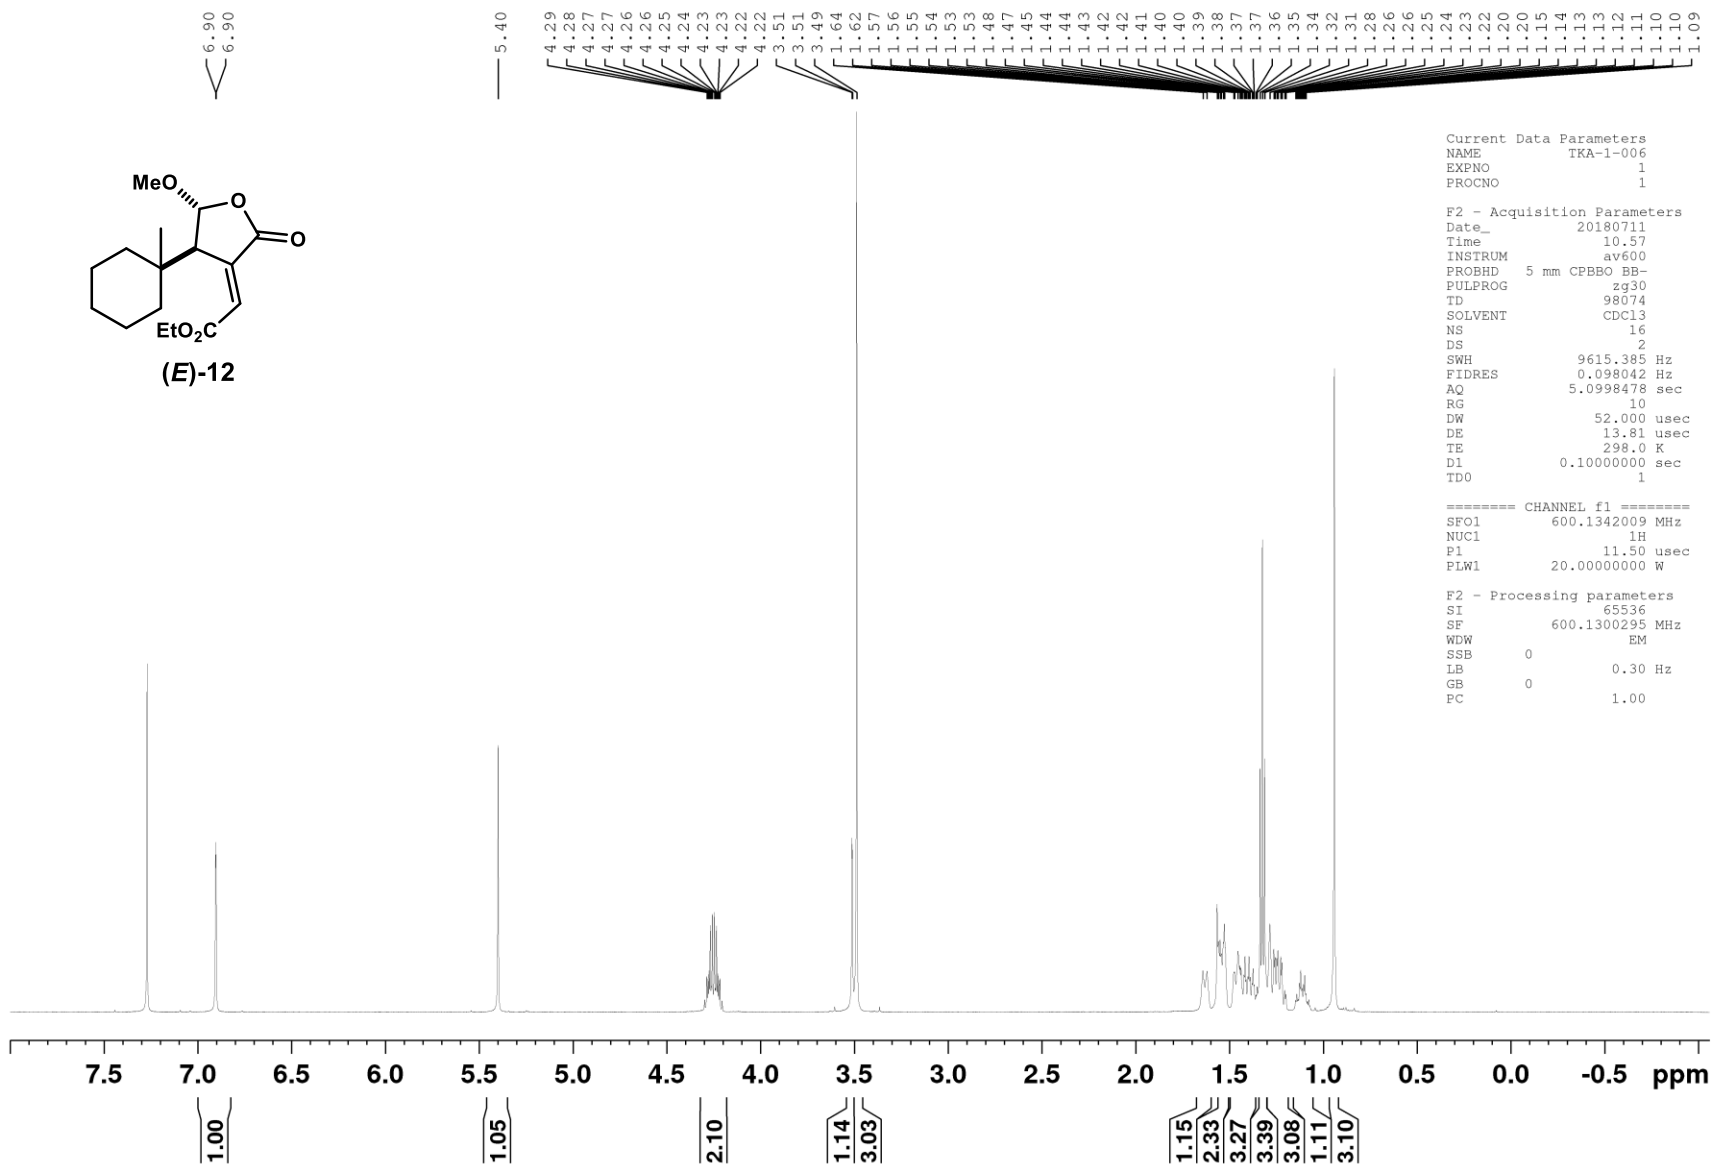

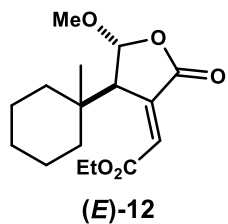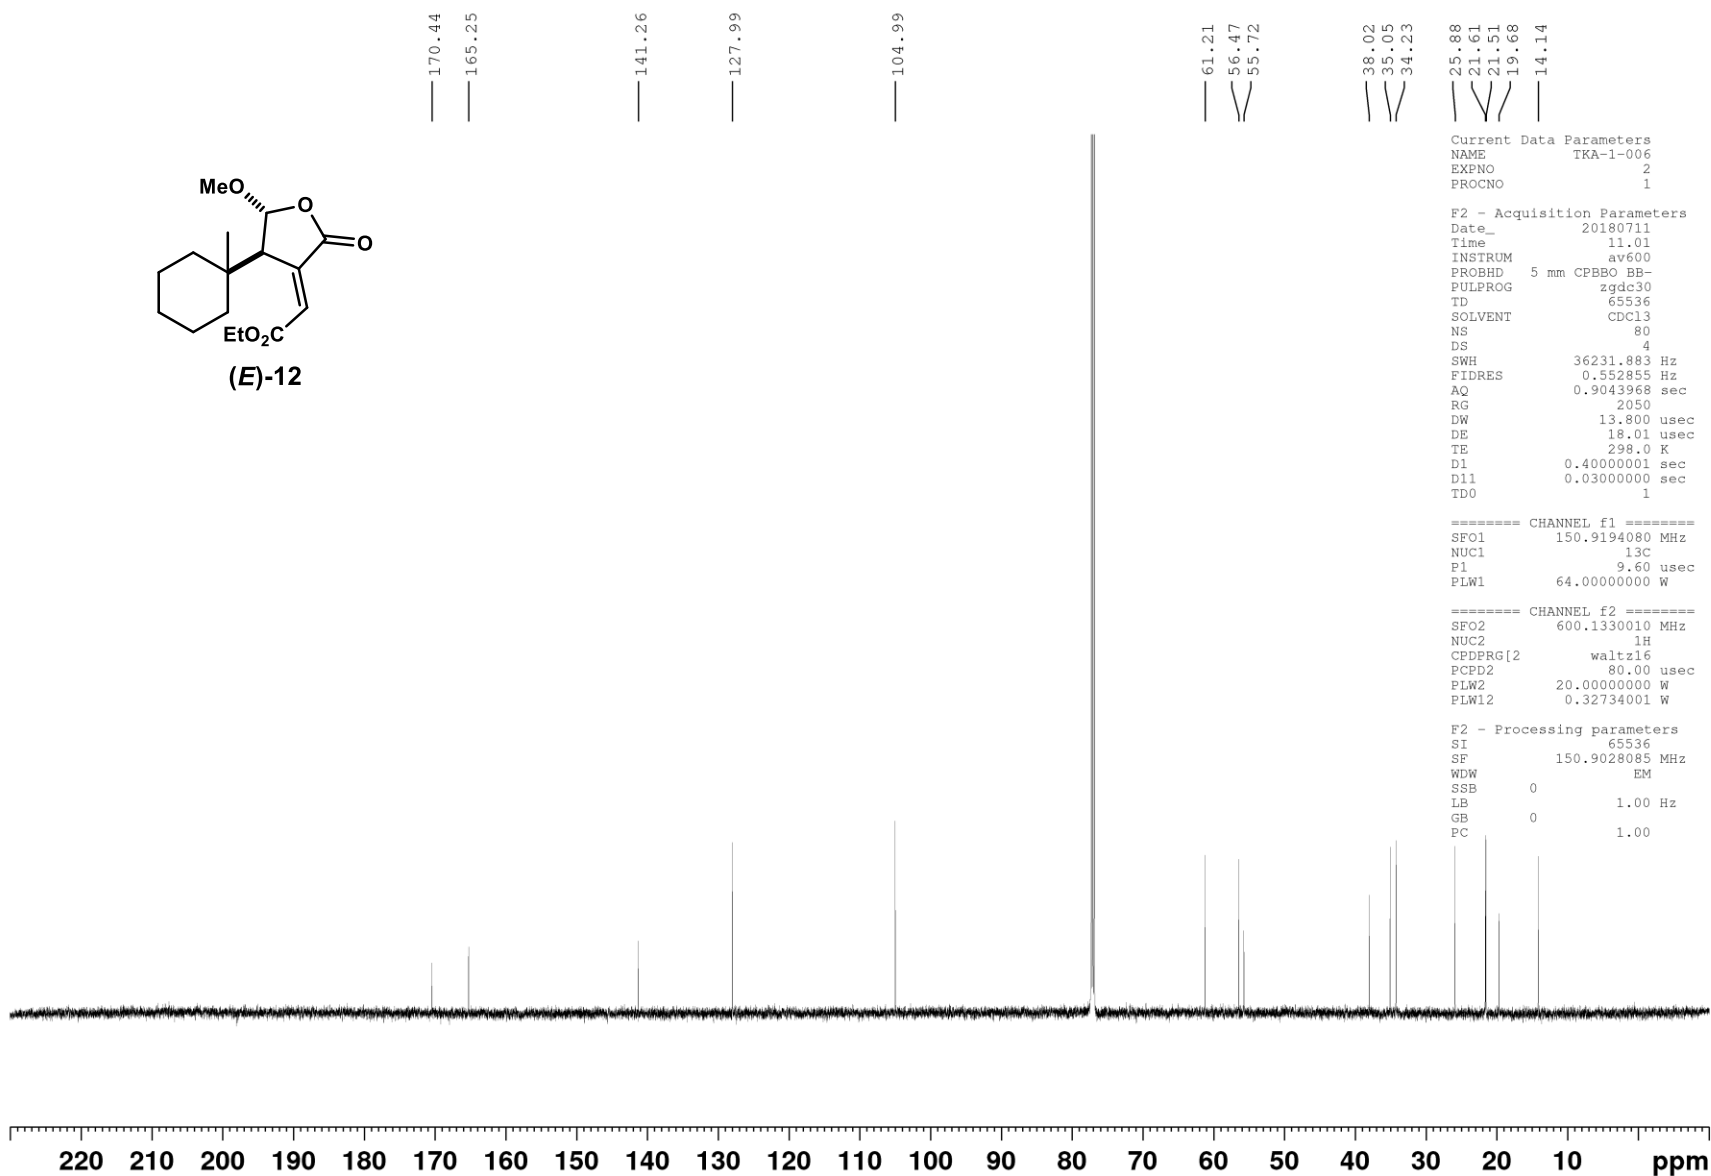

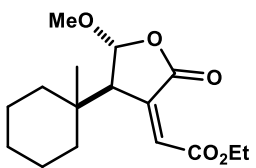

(Z)-12

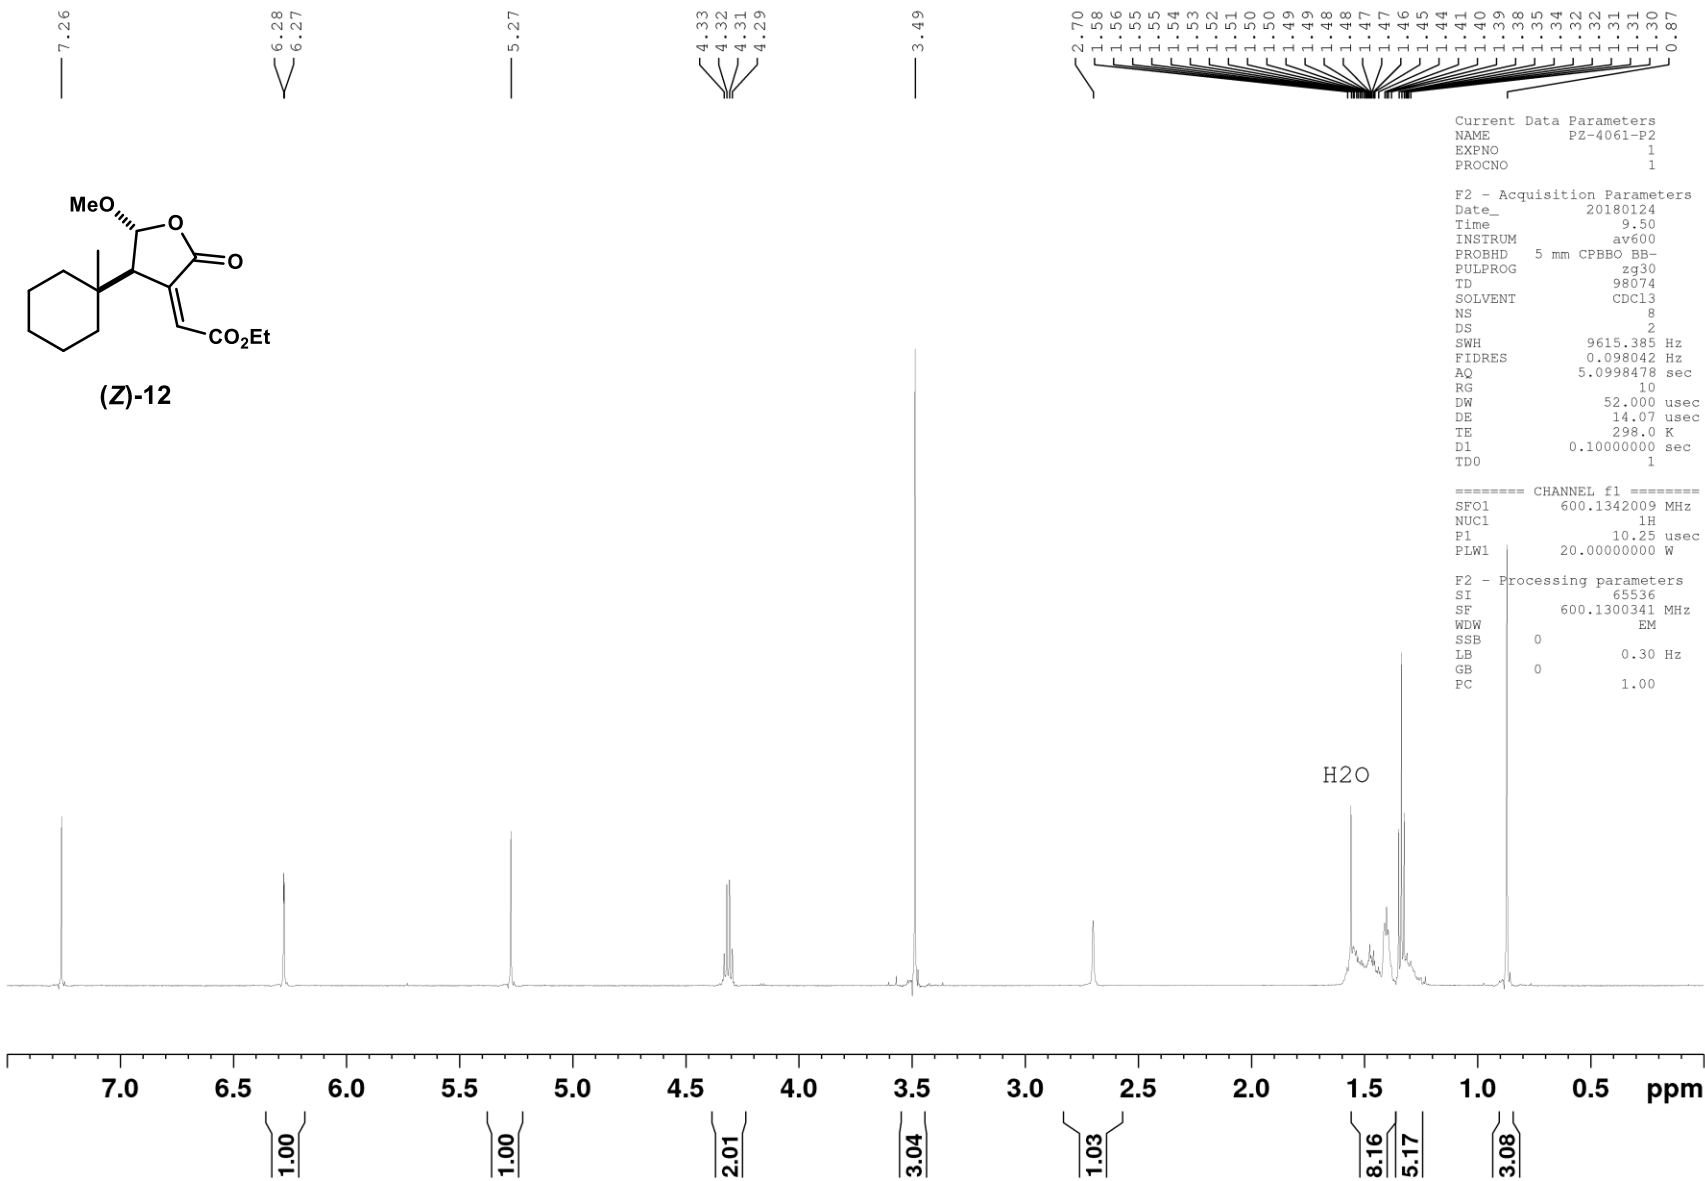



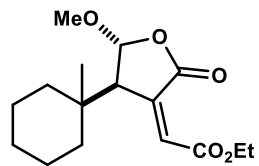

(Z)-12

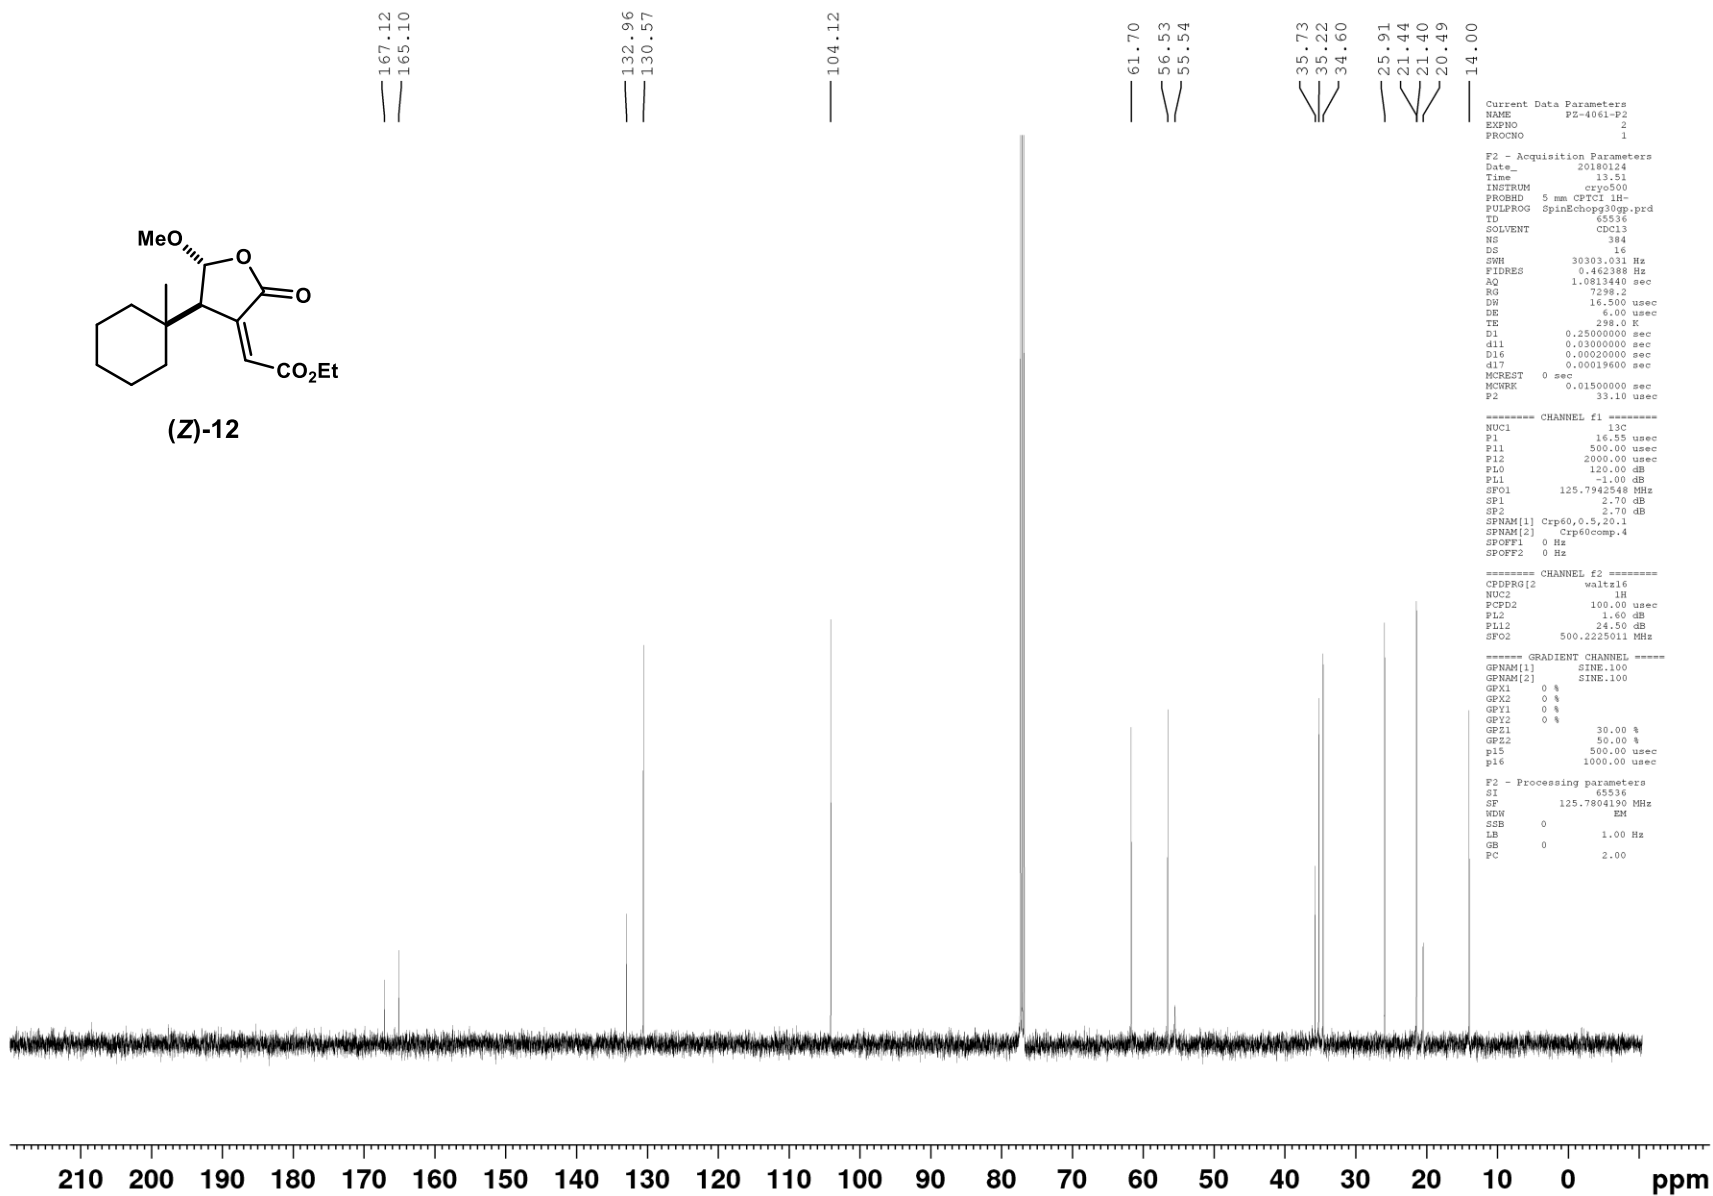

```

Current Data Parameters
NAME      FZ-4061-P2
EXPNO     2
PROCNO    1

F2 - Acquisition Parameters
Date_     20180124
Time      13.51
INSTRUM   cryo500
PROBHD    5 mm CPTCI 1H-
PULPROG   spinEchop30pp.prd
TD         65536
SOLVENT   CDCl3
NS         384
DS         16
SWH        30303.031 Hz
FIDRES     0.462388 Hz
AQ         1.0813440 sec
RG         7298.2
DM         16.500 usec
DE         6.00 usec
TE         298.0 K
D1         0.25000000 sec
d11        0.03000000 sec
D16        0.00020000 sec
d17        0.00018000 sec
MCREST     0 sec
MCNRK      0.01500000 sec
P2         33.10 usec

===== CHANNEL f1 =====
NUC1       13C
P1         16.55 usec
P11        500.00 usec
P12        2000.00 usec
PLO        120.00 dB
PL1        -1.00 dB
SFO1       125.7942548 MHz
SP1        2.70 dB
SP2        2.70 dB
SPNAM[1]   Crp60,0.5,20.1
SPNAM[2]   Crp60comp.4
SPOFF1     0 Hz
SPOFF2     0 Hz

===== CHANNEL f2 =====
CPDPRG2    waltz16
NUC2       1H
PCPD2      100.00 usec
PL2        1.60 dB
PL12       24.50 dB
SFO2       500.2225011 MHz

===== GRADIENT CHANNEL =====
GPNAM[1]   SINE.100
GPNAM[2]   SINE.100
GPX1       0 %
GPX2       0 %
GPV1       0 %
GPV2       0 %
GPZ1       30.00 %
GPZ2       50.00 %
p15        500.00 usec
p16        1000.00 usec

F2 - Processing parameters
SI         65536
SF         125.7804190 MHz
MDH        EM
SSB        0
LB         1.00 Hz
GB         0
PC         2.00

```

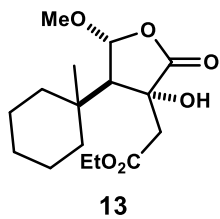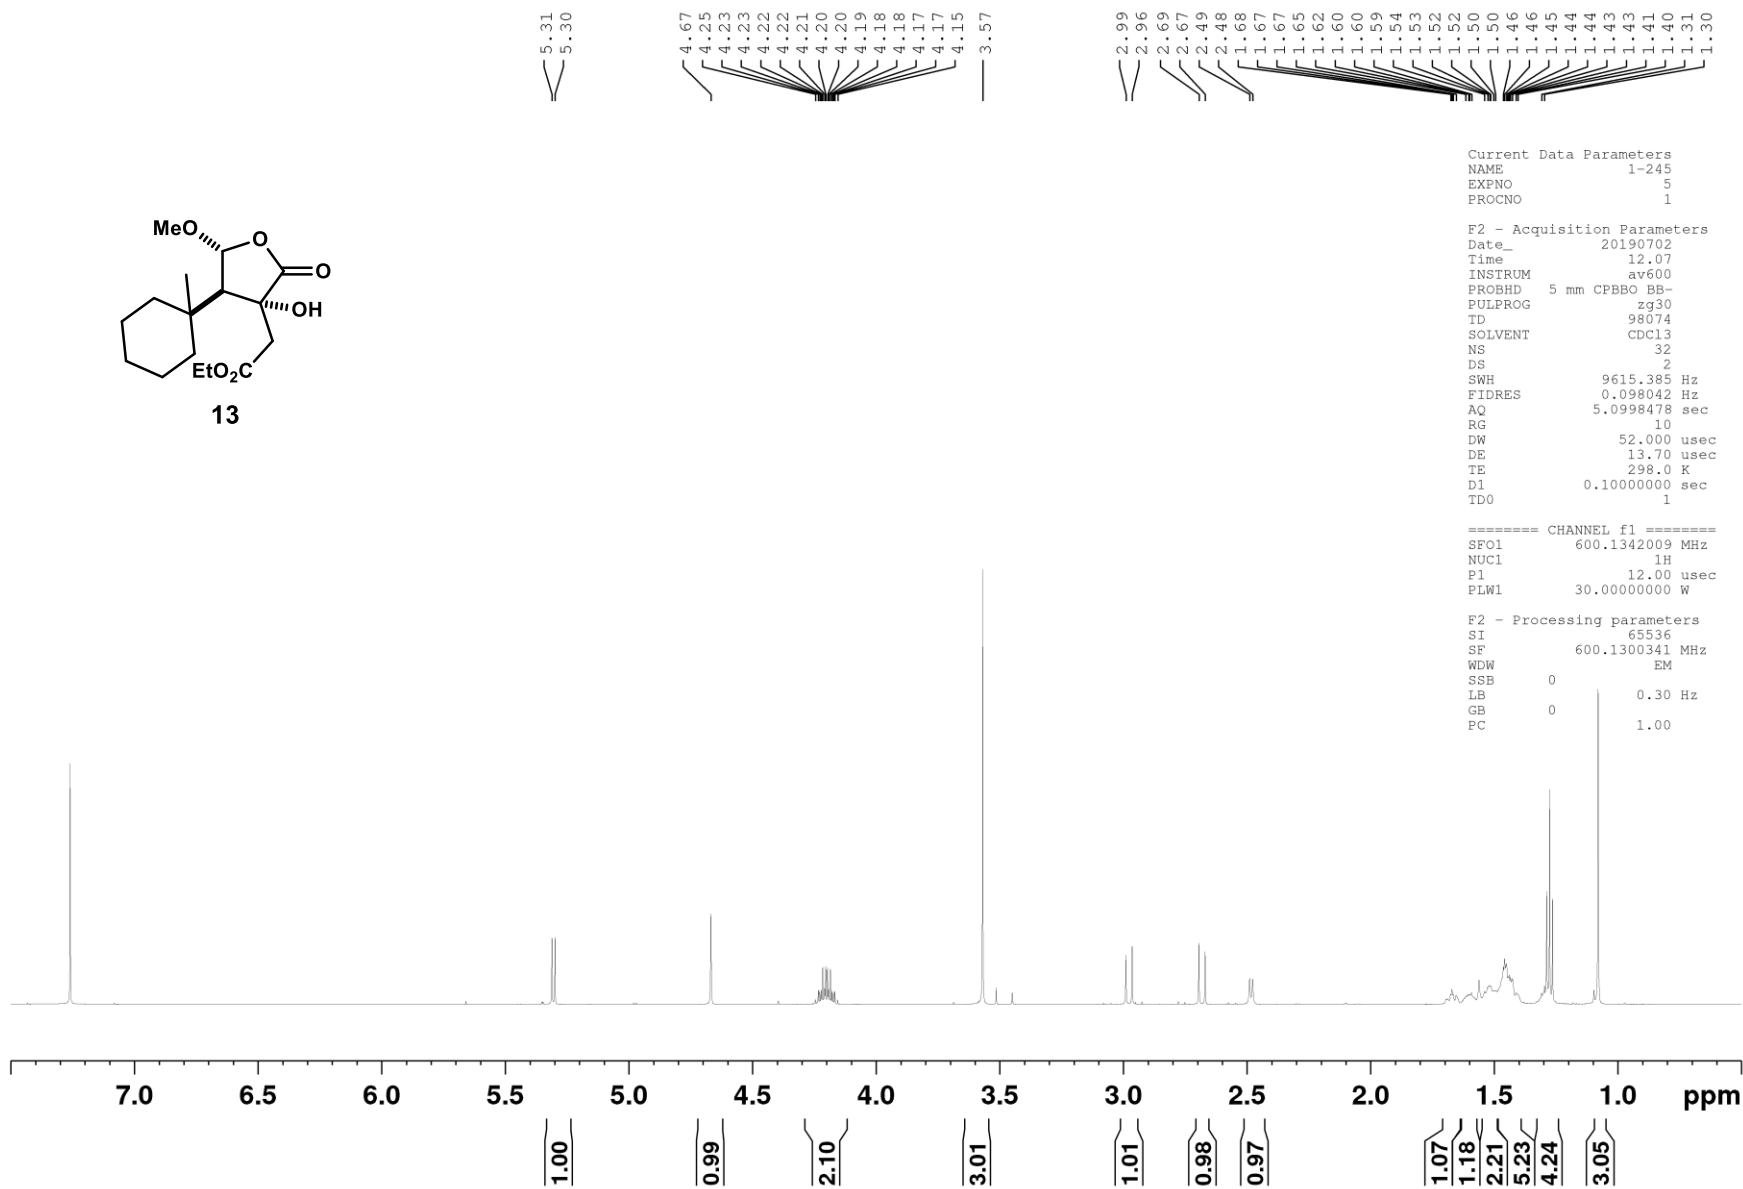

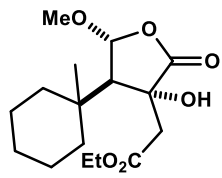

13

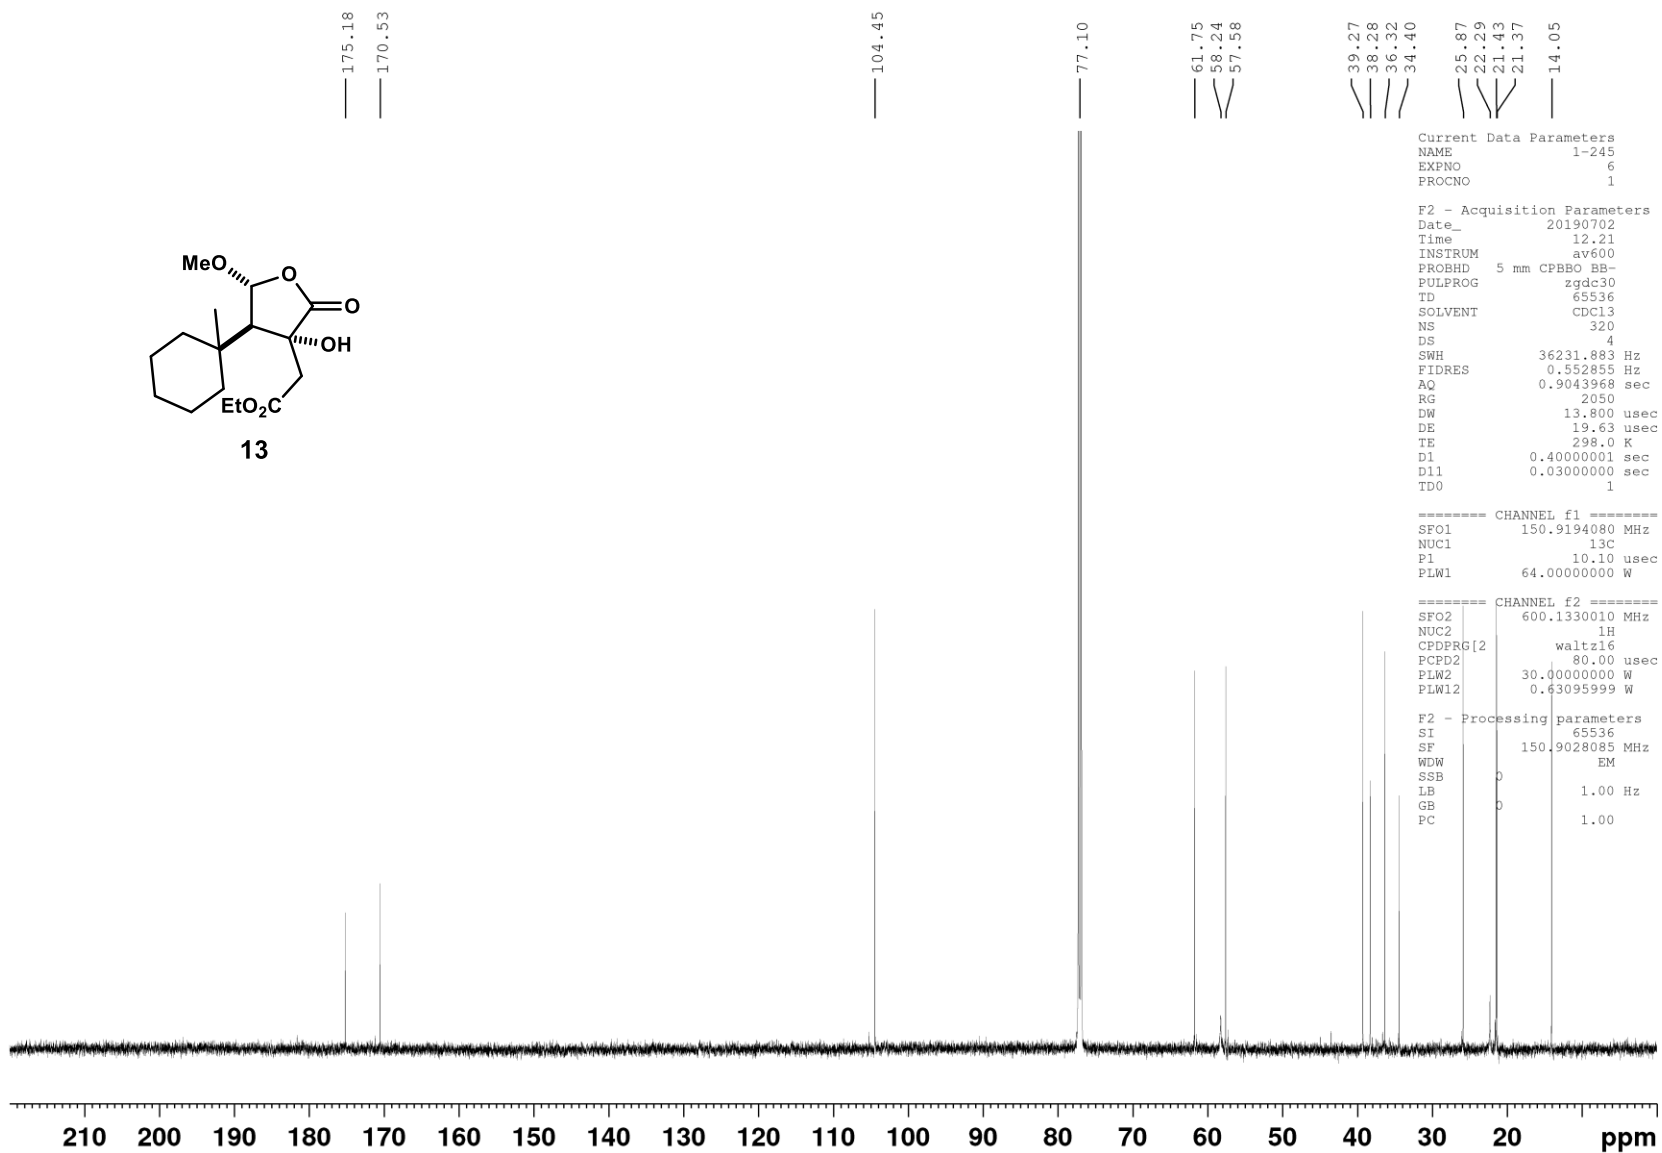

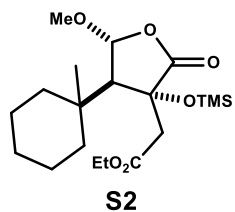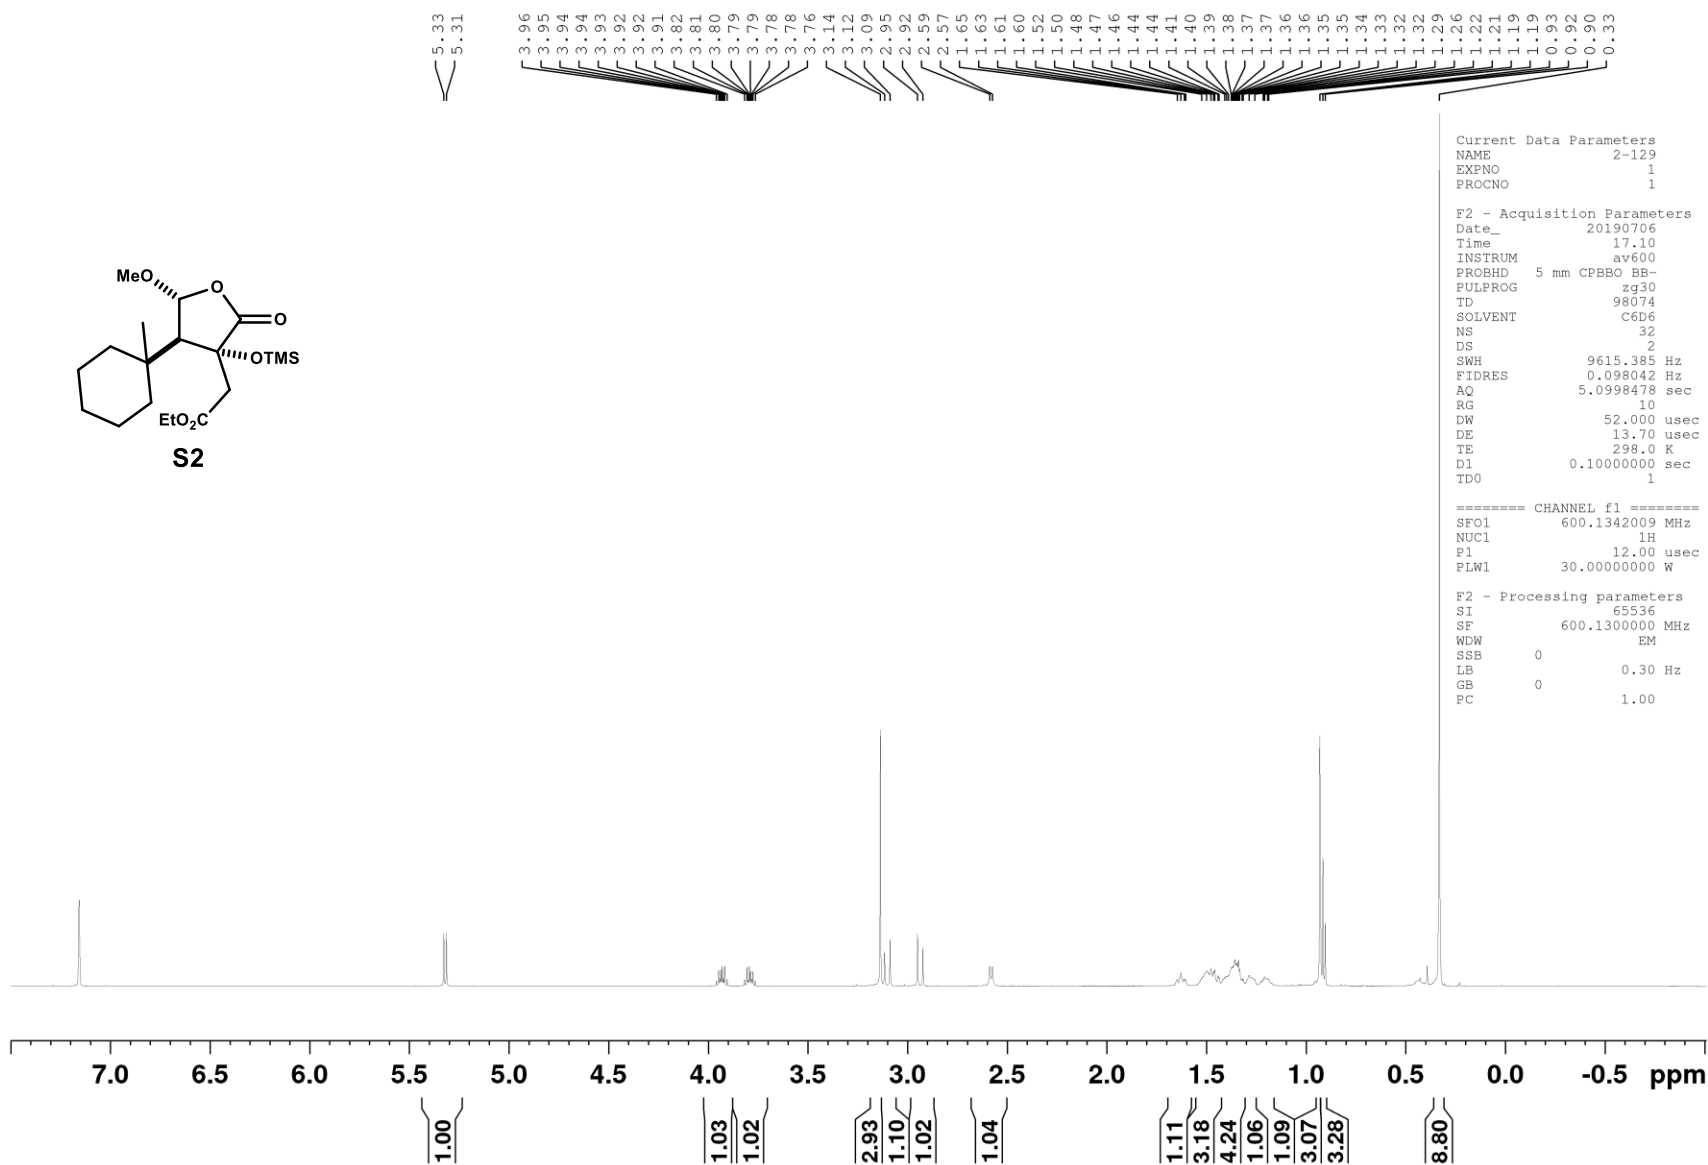

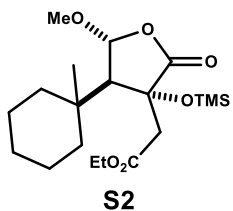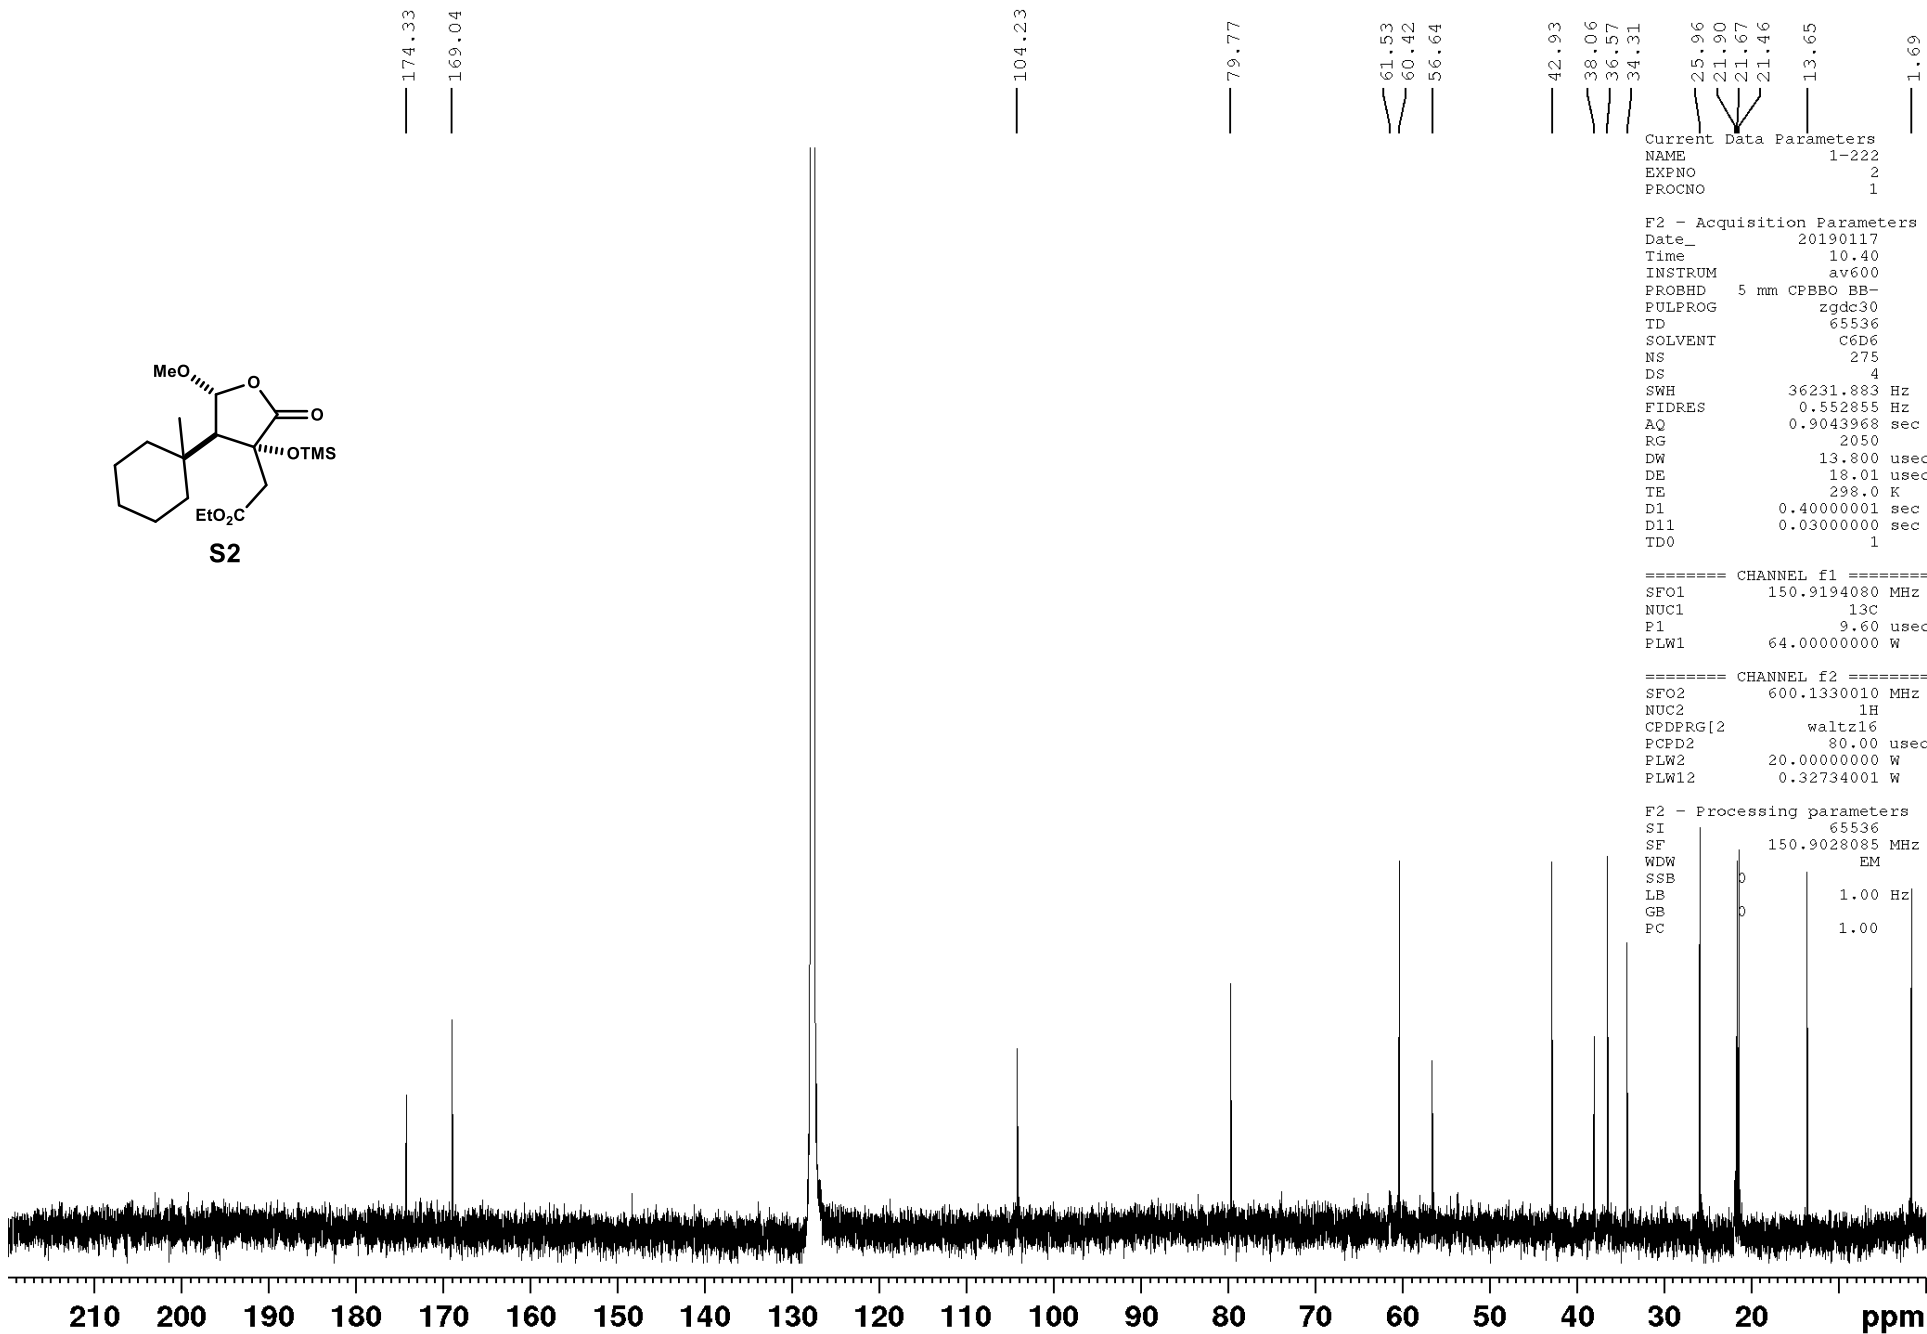

Current Data Parameters  
 NAME 1-222  
 EXPNO 2  
 PROCNO 1

F2 - Acquisition Parameters  
 Date\_ 20190117  
 Time 10.40  
 INSTRUM av600  
 PROBHD 5 mm CPBBO BB-  
 PULPROG zgdc30  
 TD 65536  
 SOLVENT CDCl3  
 NS 275  
 DS 4  
 SWH 36231.883 Hz  
 FIDRES 0.552855 Hz  
 AQ 0.9043968 sec  
 RG 2050  
 DW 13.800 usec  
 DE 18.01 usec  
 TE 298.0 K  
 D1 0.40000001 sec  
 D11 0.03000000 sec  
 TD0 1

===== CHANNEL f1 =====  
 SFO1 150.9194080 MHz  
 NUC1 13C  
 P1 9.60 usec  
 PLW1 64.00000000 W

===== CHANNEL f2 =====  
 SFO2 600.1330010 MHz  
 NUC2 1H  
 CPDPRG2 waltz16  
 PCD2 80.00 usec  
 PLW2 20.00000000 W  
 PLW12 0.32734001 W

F2 - Processing parameters  
 SI 65536  
 SF 150.9028085 MHz  
 WDW EM  
 SSB 0  
 LB 1.00 Hz  
 GB 0  
 PC 1.00

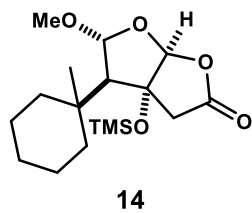

5.74  
5.71

4.74  
4.73  
4.55  
4.54

3.26  
3.16  
2.65  
2.62  
2.44  
2.43  
2.30  
2.28  
1.47  
1.46  
1.45  
1.44  
1.44  
1.44  
1.43  
1.42  
1.41  
1.40  
1.39  
1.38  
1.37  
1.36  
1.35  
1.34  
1.33  
1.33  
1.32  
1.32  
1.31  
1.31  
1.30  
1.29  
1.27  
1.25  
1.25  
1.24  
1.23  
1.18  
1.17  
1.16  
1.16  
1.10  
1.09  
0.71  
0.02

Current Data Parameters  
NAME 2-129  
EXPNO 5  
PROCNO 1

F2 - Acquisition Parameters  
Date\_ 20190710  
Time 9.37  
INSTRUM av600  
PROBHD 5 mm CPBBO BB-  
PULPROG zg30  
TD 98074  
SOLVENT C6D6  
NS 48  
DS 2  
SWH 9615.385 Hz  
FIDRES 0.098042 Hz  
AQ 5.0998478 sec  
RG 10  
DW 52.000 usec  
DE 13.70 usec  
TE 298.0 K  
D1 0.10000000 sec  
TDO 1

===== CHANNEL f1 =====  
SFO1 600.1342009 MHz  
NUC1 1H  
P1 12.00 usec  
PLW1 30.00000000 W

F2 - Processing parameters  
SI 65536  
SF 600.1299988 MHz  
WDW EM  
SSB 0  
LB 0.30 Hz  
GB 0  
PC 1.00

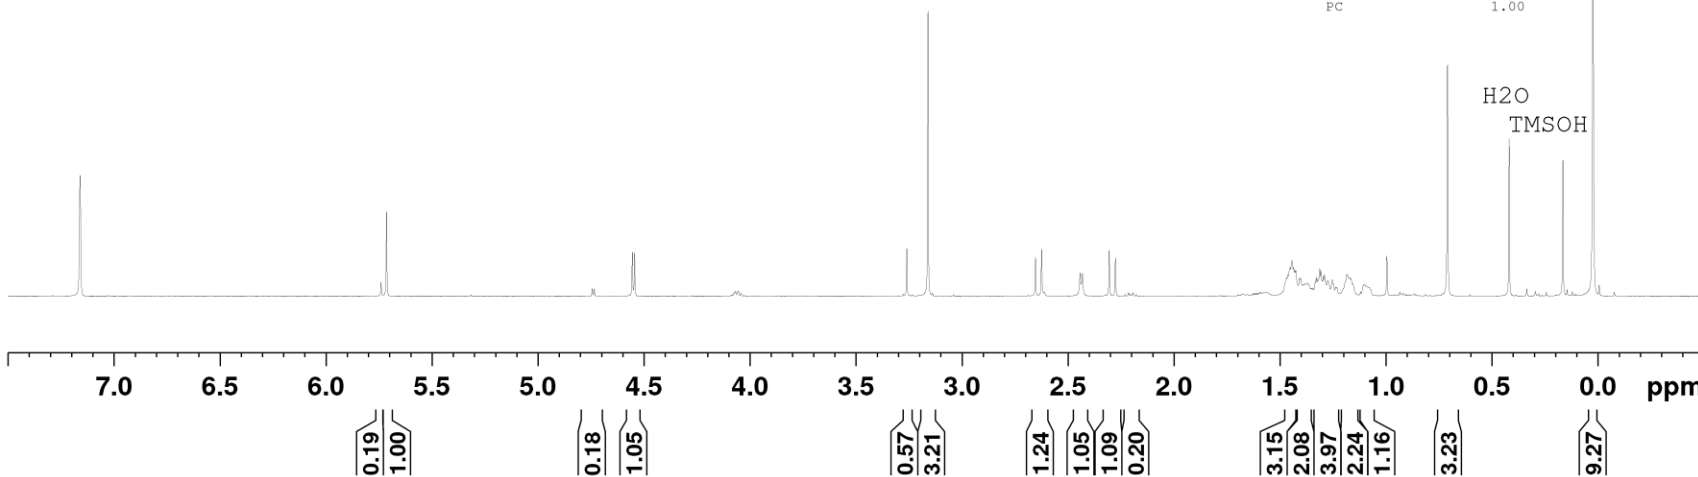

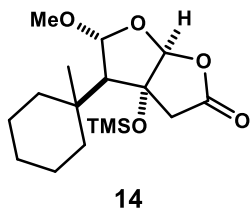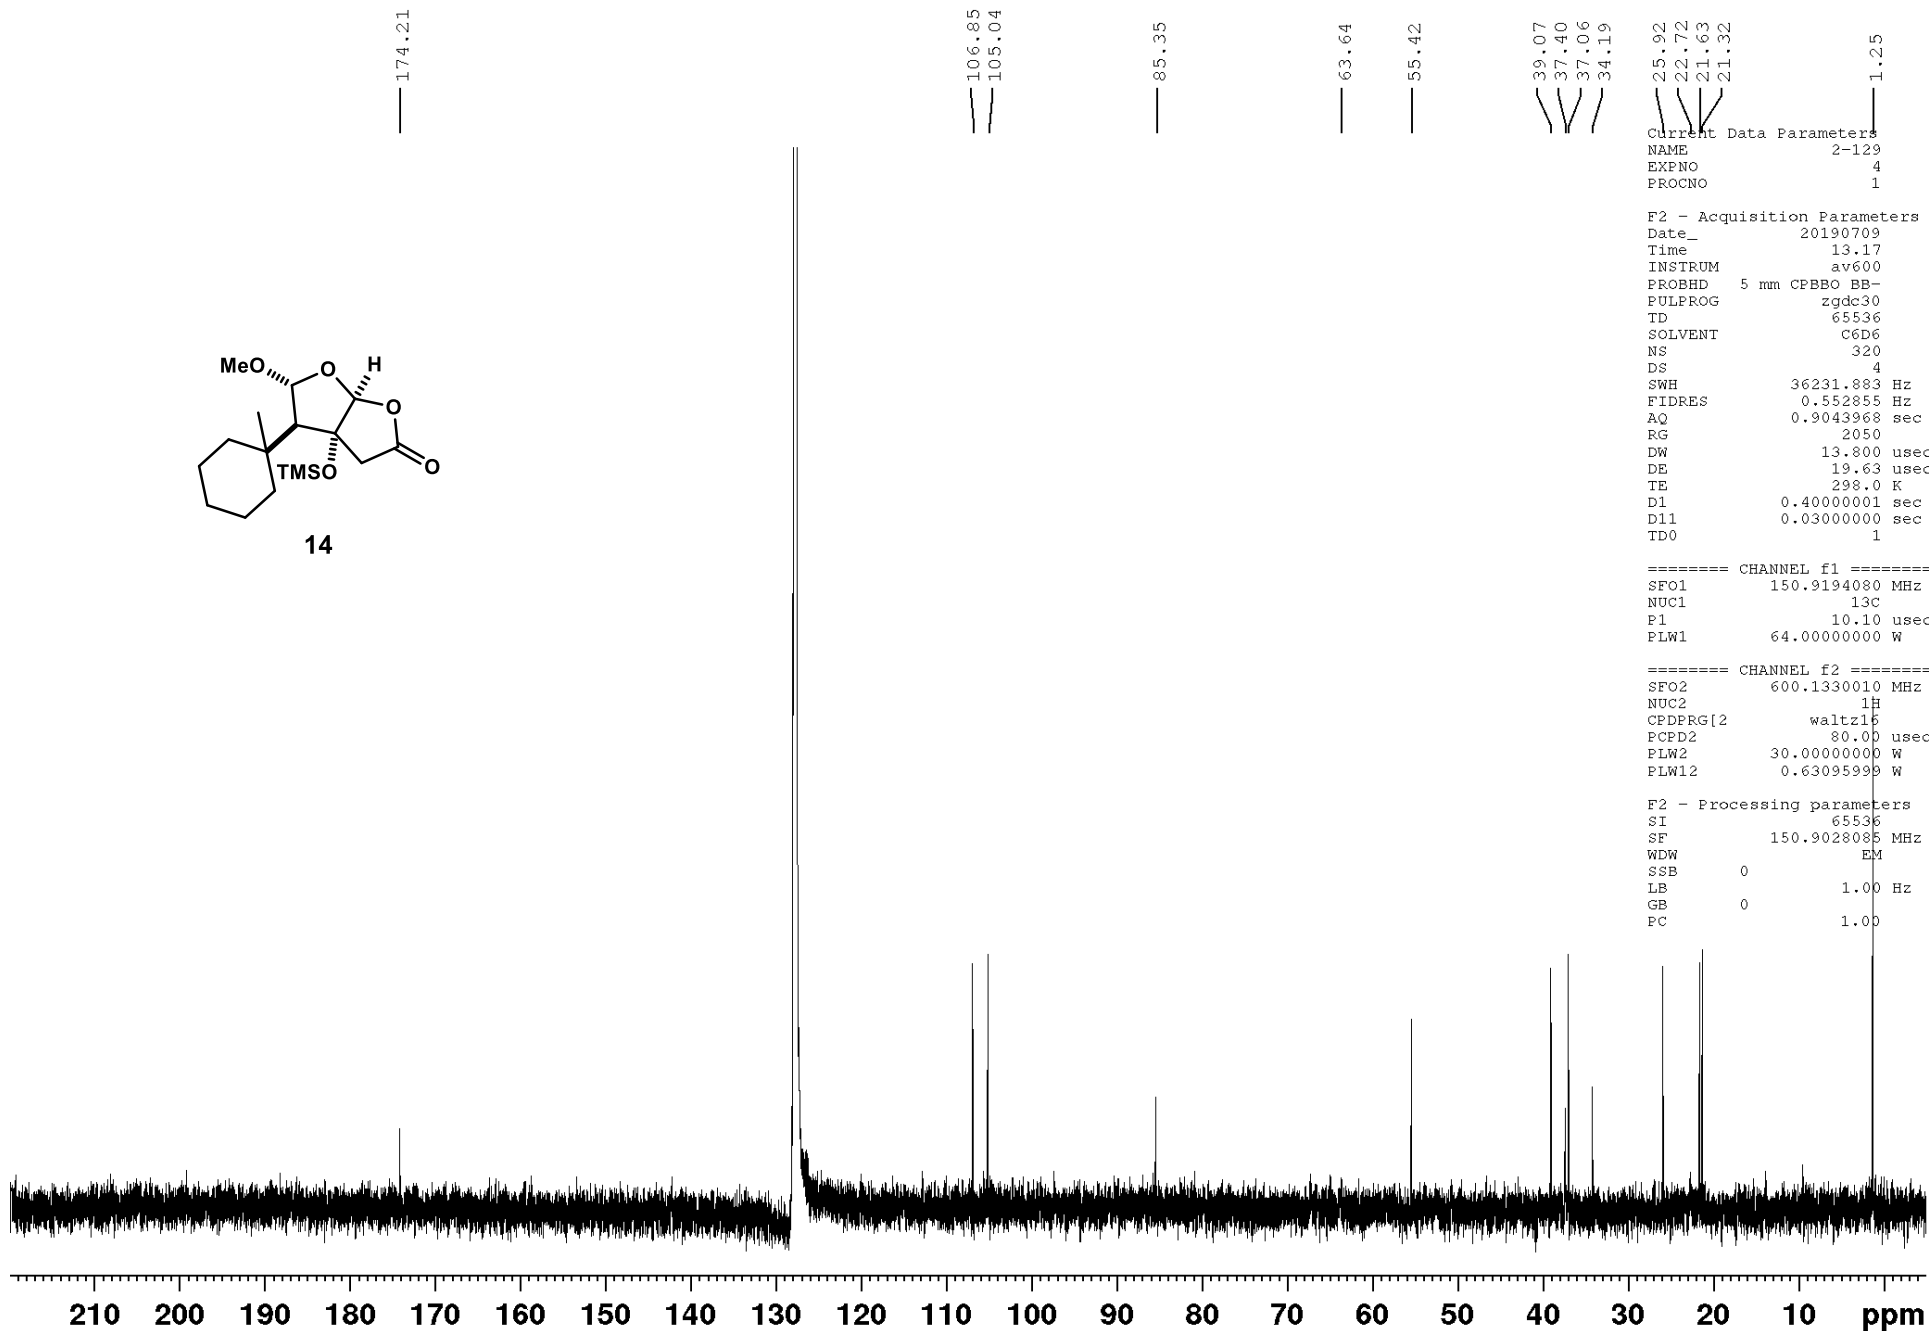

```

Current Data Parameters
NAME          2-129
EXPNO         4
PROCNO        1

F2 - Acquisition Parameters
Date_         20190709
Time          13.17
INSTRUM       av600
PROBHD        5 mm CPBBO BB-
PULPROG       zgdc30
TD            65536
SOLVENT       C6D6
NS            320
DS            4
SWH           36231.883 Hz
FIDRES        0.552855 Hz
AQ            0.9043968 sec
RG            2050
DW            13.800 usec
DE            19.63 usec
TE            298.0 K
D1            0.40000001 sec
D11           0.03000000 sec
TD0           1

===== CHANNEL f1 =====
SFO1          150.9194080 MHz
NUC1           13C
P1             10.10 usec
PLW1           64.00000000 W

===== CHANNEL f2 =====
SFO2          600.1330010 MHz
NUC2            1H
CPDPRG[2]     waltz16
PCPD2         80.00 usec
PLW2          30.00000000 W
PLW12         0.63095999 W

F2 - Processing parameters
SI            65536
SF            150.9028085 MHz
WDW           EM
SSB           0
LB            1.00 Hz
GB            0
PC            1.00

```

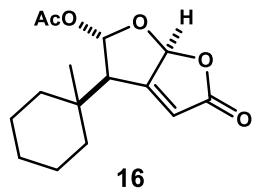

6.48  
6.48  
6.17  
5.98  
5.98

3.22

2.13  
1.53  
1.51  
1.50  
1.48  
1.47  
1.46  
1.45  
1.44  
1.42  
1.41  
1.40  
1.38  
1.38  
1.33  
1.33  
1.32  
1.31  
1.29  
1.25  
1.01

```
Current Data Parameters
NAME          2-137
EXPNO         8
PROCNO        1

F2 - Acquisition Parameters
Date_         20190724
Time          9.36
INSTRUM       av600
PROBHD        5 mm CPBBO BB-
PULPROG       zg30
TD            98074
SOLVENT       CDCl3
NS            32
DS            2
SWH           9615.385 Hz
FIDRES        0.098042 Hz
AQ            5.0998478 sec
RG            10
DW            52.000 usec
DE            13.70 usec
TE            298.0 K
D1            0.10000000 sec
TD0           1

===== CHANNEL f1 =====
SFO1          600.1342009 MHz
NUC1          1H
PI            12.00 usec
PLW1          30.00000000 W

F2 - Processing parameters
SI            65536
SF            600.1300364 MHz
WDW           EM
SSB           0
LB            0.30 Hz
GB            0
PC            1.00
```

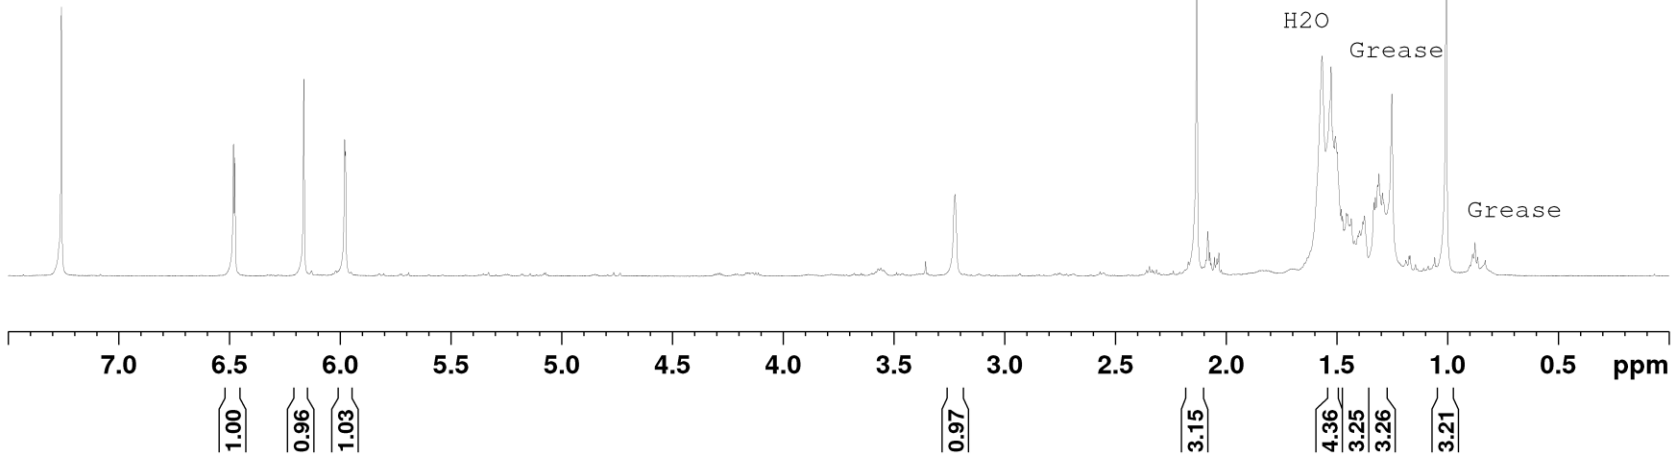



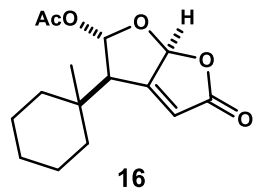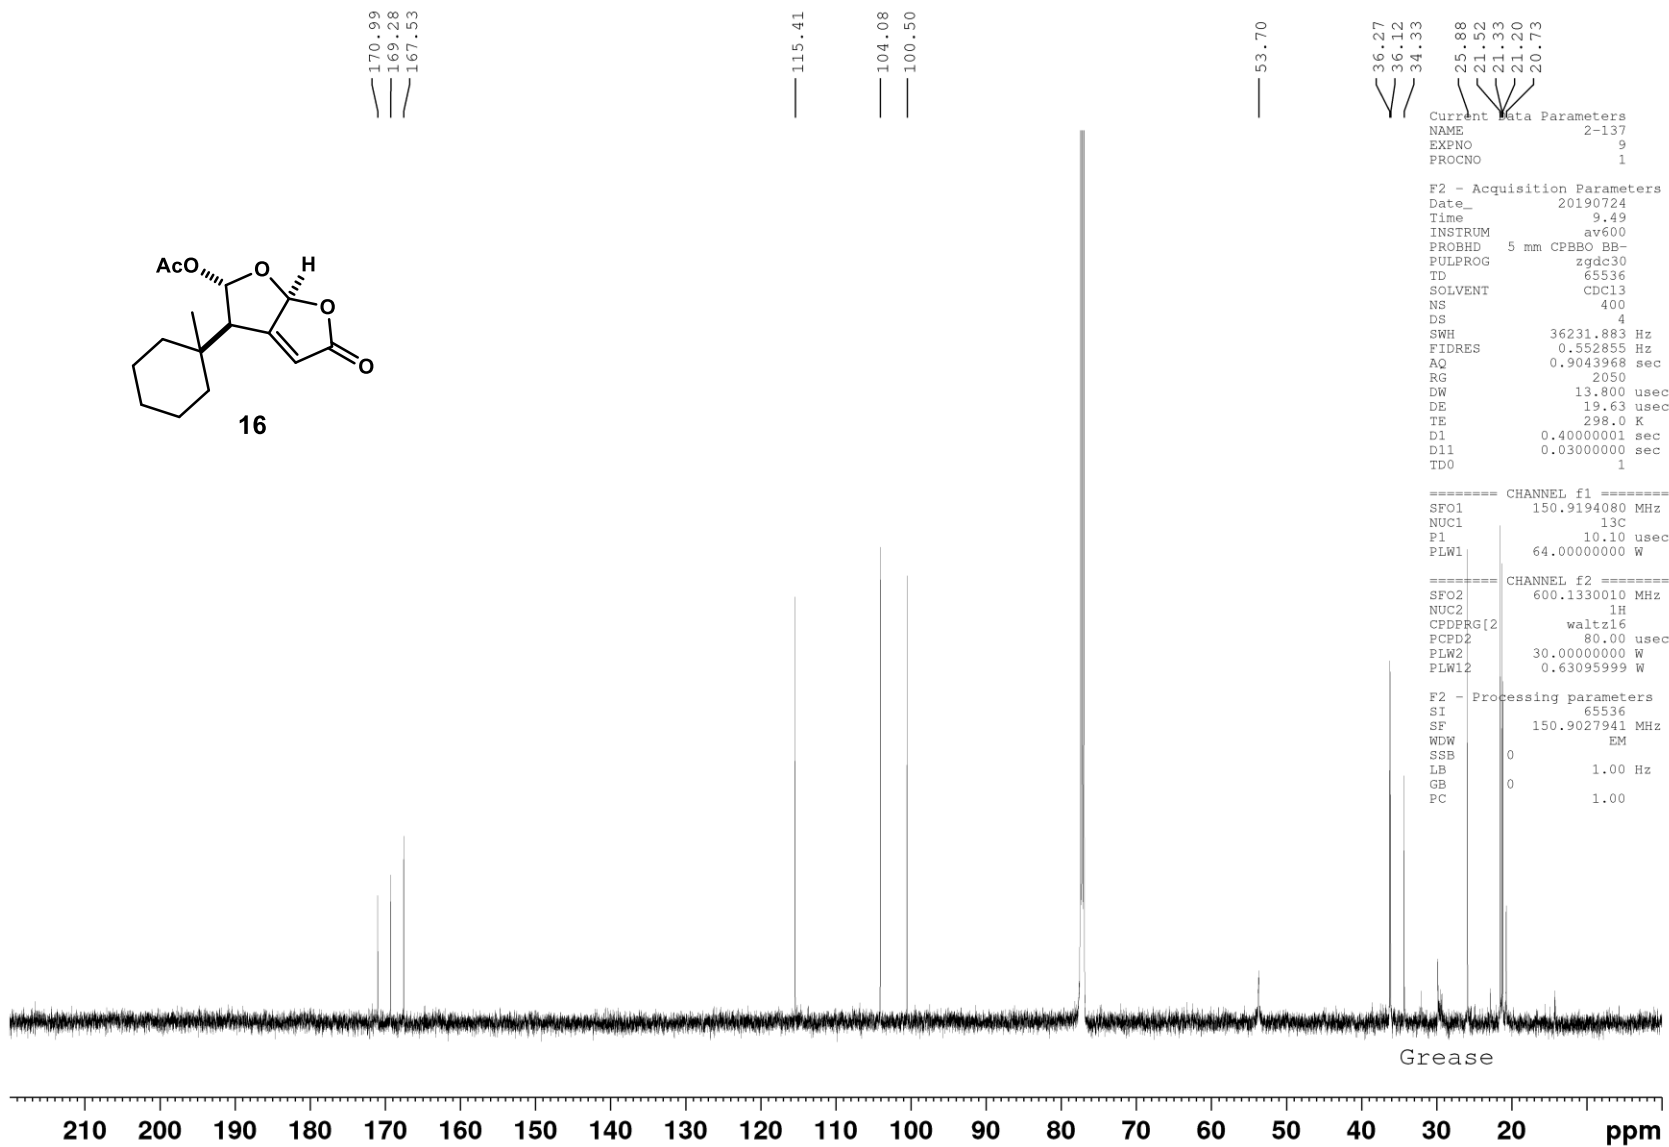

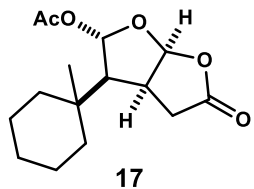

6.42  
6.41

6.05  
6.04

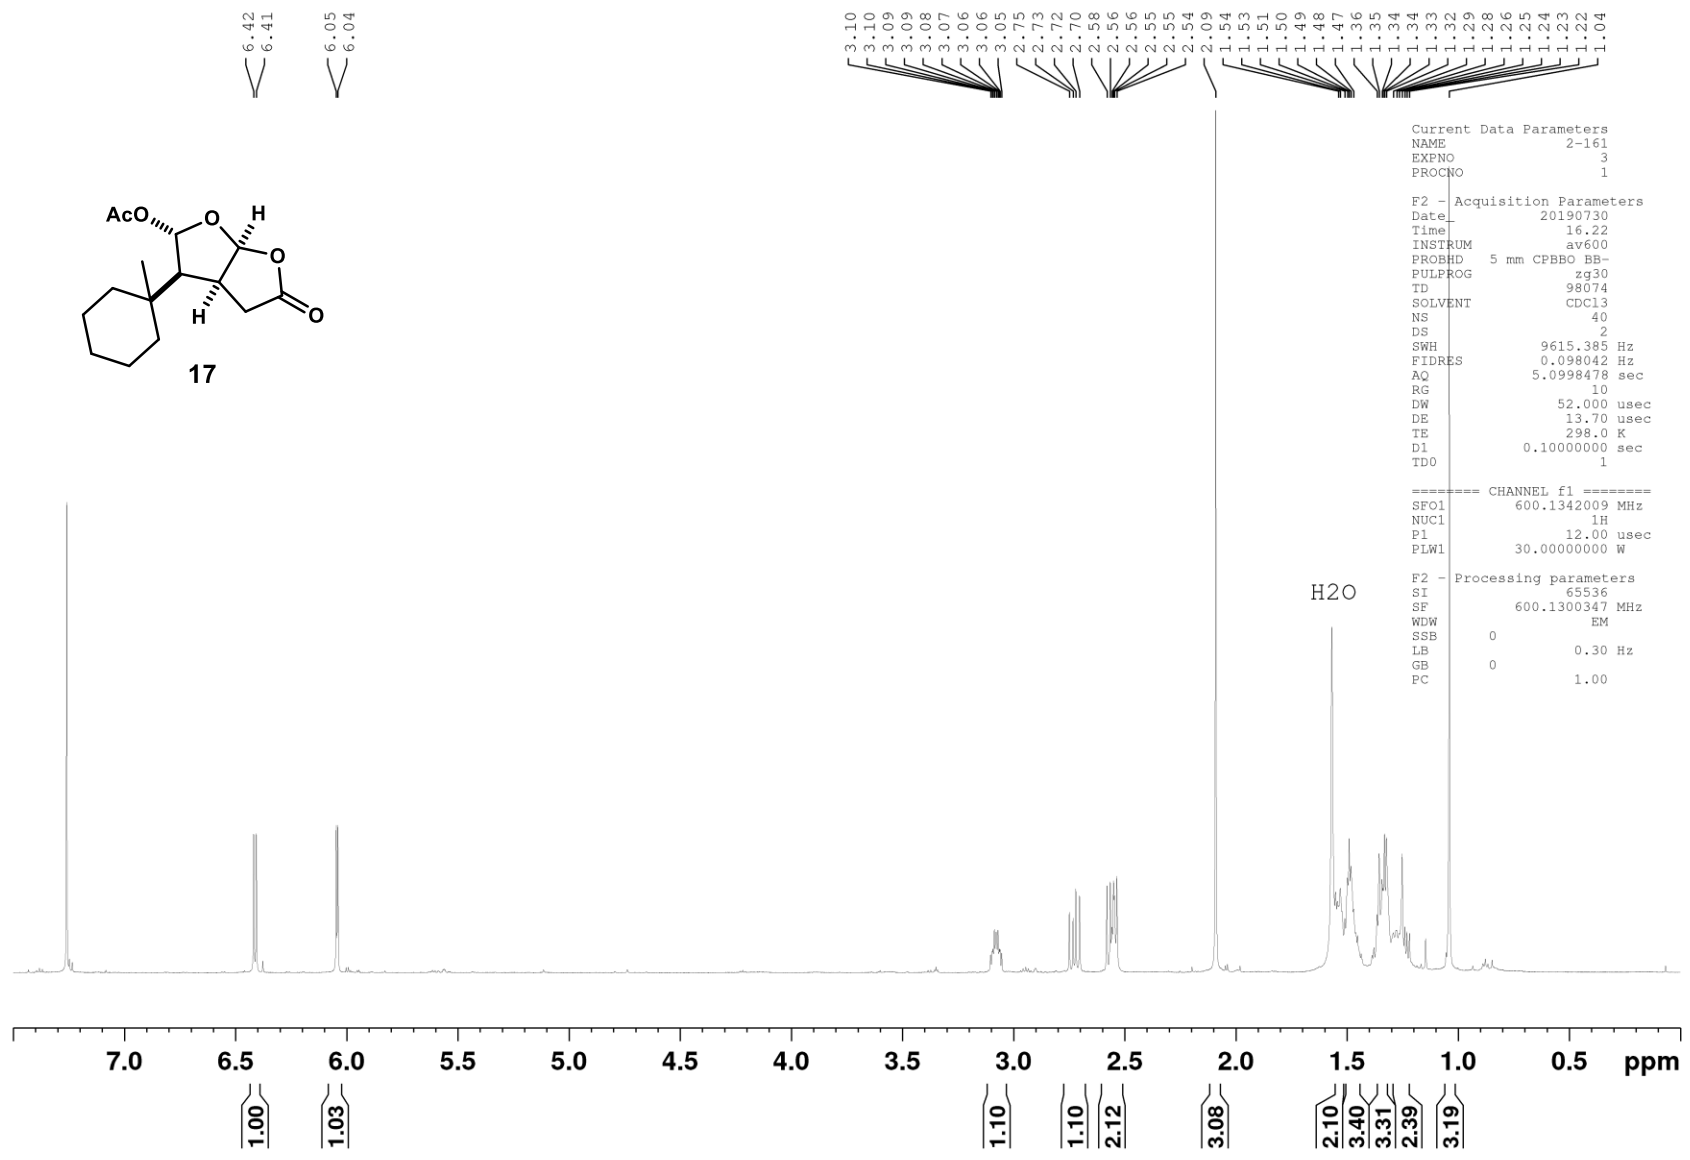

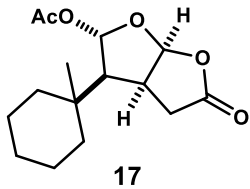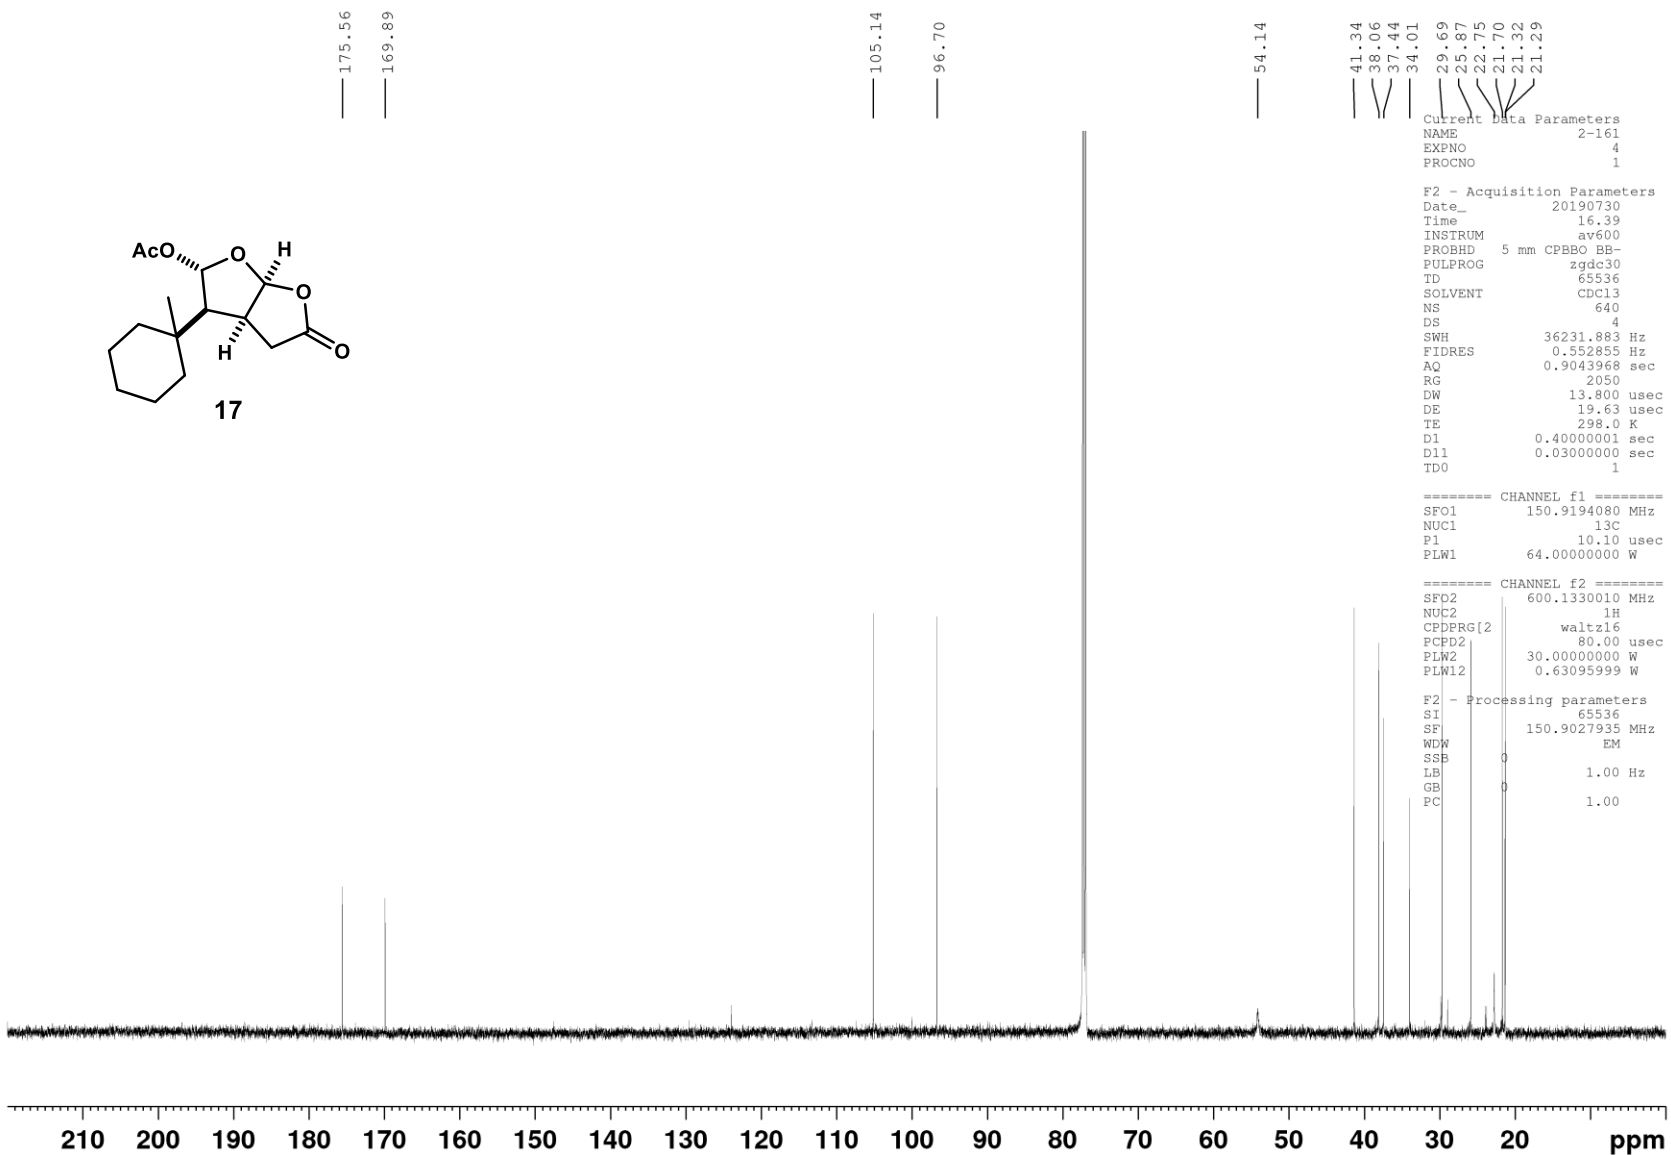

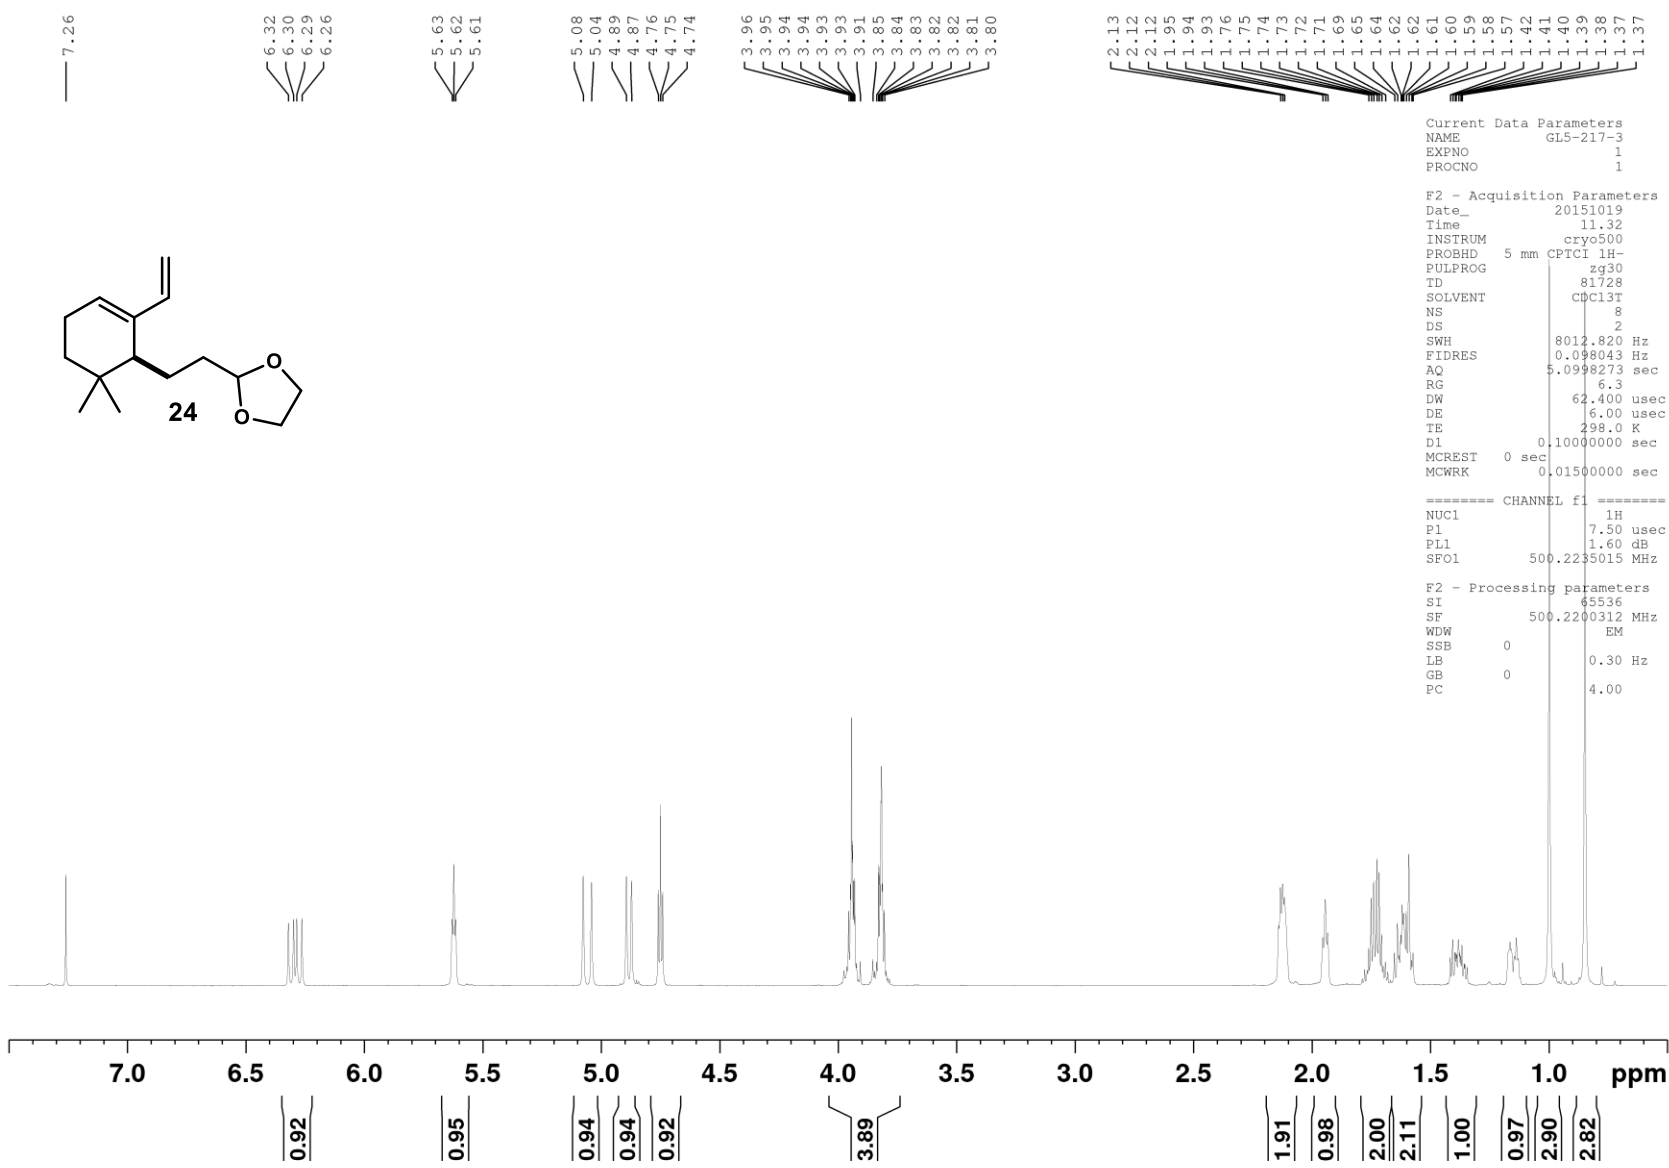

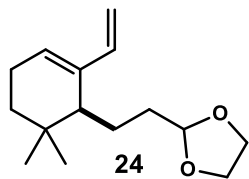

140.49  
140.21

127.95

109.77  
105.13

77.41  
77.16  
76.90

64.96  
64.92

43.05

34.68  
32.50  
30.47  
28.85  
27.05  
26.79  
23.66

Current Data Parameters  
NAME GLS-217-3  
EXPNO 2  
PROCNO 1

F2 - Acquisition Parameters  
Date\_ 20191019  
Time 11:34  
INSTRUM cryo500  
PROBHD 5 mm CPXI 1H-  
PULPROG SpinEcho30ppr.prd  
TD 65536  
SOLVENT CDCl3  
NS 85  
DS 16  
SFO 30303.031 Hz  
FIDRES 0.462388 Hz  
AQ 1.0819440 sec  
RG 10321.3  
DM 16.500 usec  
DE 6.00 usec  
TE 298.0 K  
DL 0.25000000 sec  
dL1 0.03000000 sec  
D16 0.00020000 sec  
d17 0.00019600 sec  
MCREST 0 sec  
MCWRR 0.01500000 sec  
F2 33.10 usec

===== CHANNEL f1 =====  
NUC1 13C  
P1 16.55 usec  
P11 500.00 usec  
P12 2000.00 usec  
PL0 120.00 dB  
PL1 -1.00 dB  
SFO1 125.7942548 MHz  
SP1 2.70 dB  
SP2 2.70 dB  
SFOFF1 0 Hz  
SFOFF2 0 Hz

===== CHANNEL f2 =====  
CPDPRG2 waltz16  
NUC2 1H  
PCPD2 100.00 usec  
PL2 1.60 dB  
PL12 24.50 dB  
SFO2 500.2225011 MHz

===== GRADIENT CHANNEL =====  
GPNAM[1] SINE.100  
GPNAM[2] SINE.100  
GPX1 0 %  
GPX2 0 %  
GPY1 0 %  
GPY2 0 %  
GPZ1 30.00 %  
GPZ2 50.00 %  
p15 500.00 usec  
p16 1000.00 usec

F2 - Processing parameters  
SI 65536  
SF 125.7804090 MHz  
RG 0 EM  
LB 1.00 Hz  
GB 0  
PC 2.00

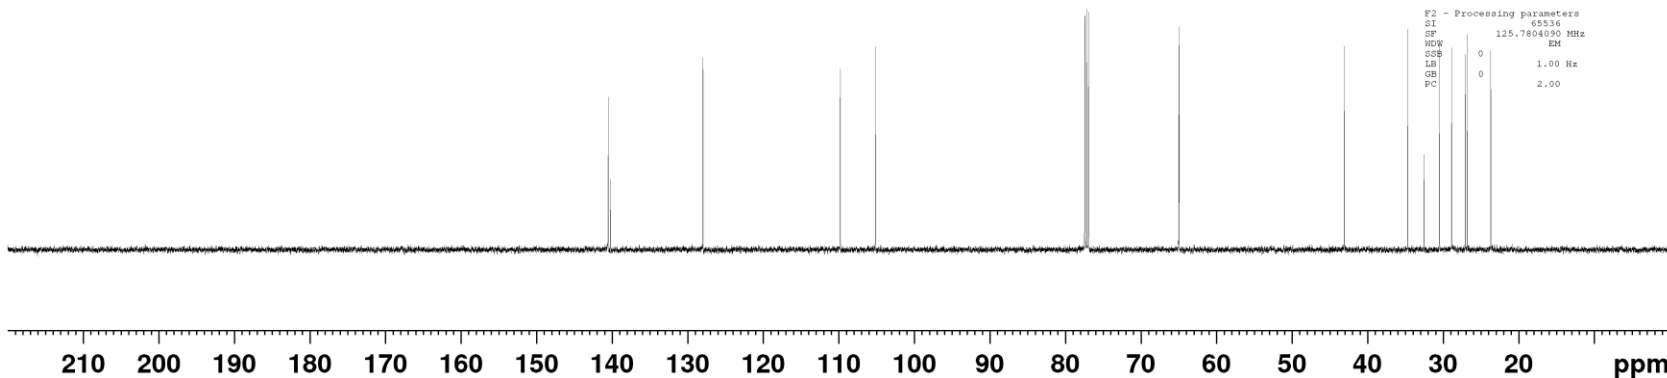

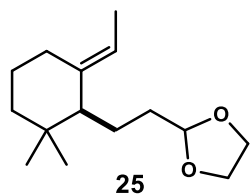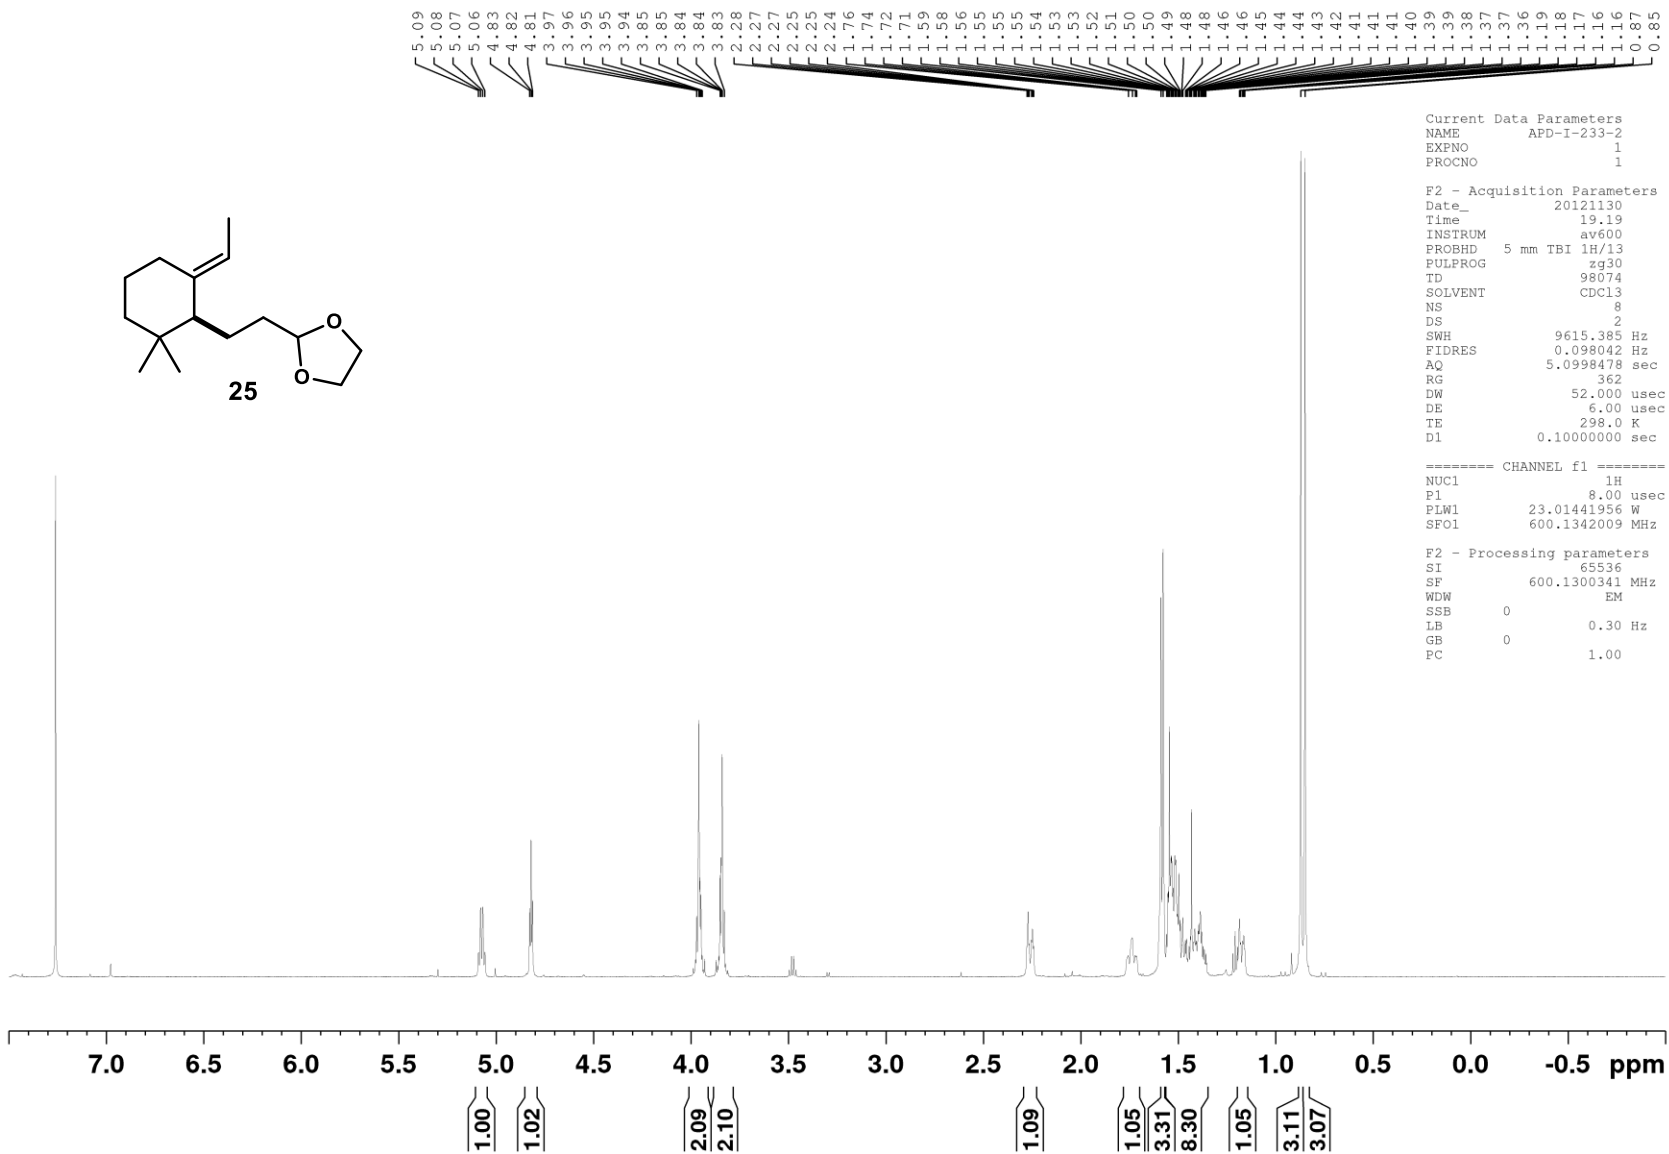

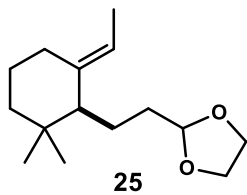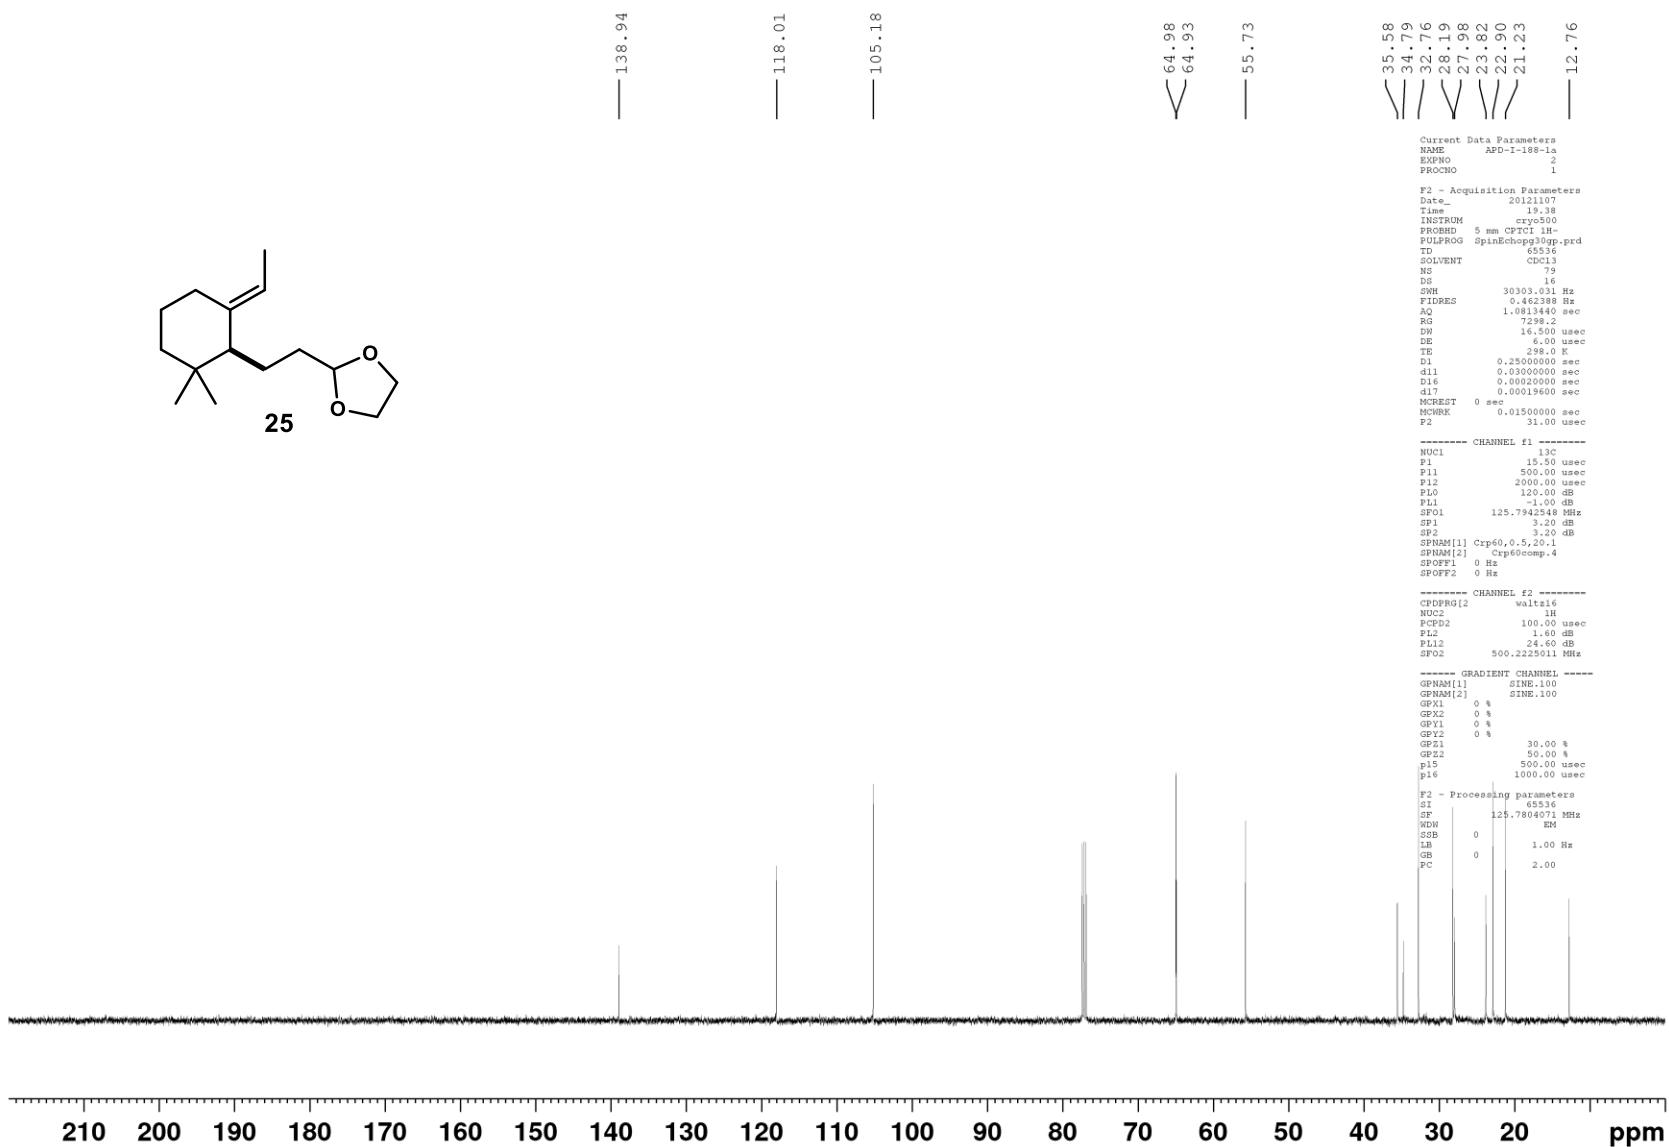

```

Current Data Parameters
NAME      APD-I-188-1a
EXPNO     2
PROCNO    1

F2 - Acquisition Parameters
Date_     20121107
Time      19.38
INSTRUM   cryo500
PROBHD    5 mm CPTCI 1H-
PULPROG   spinEchoq30pp-prd
ID         65536
SOLVENT   CDCl3
NS         79
DS         16
SWH        30303.031 Hz
FIDRES     0.462388 Hz
AQ         1.0813440 sec
RG         7298.2
DW         14.500 usec
DE         6.00 usec
TE         298.0 K
D1         0.25000000 sec
d11        0.03000000 sec
D16        0.00200000 sec
d17        0.00019600 sec
MCRET     0 sec
MCHREK    0.01500000 sec
P2         31.00 usec

----- CHANNEL f1 -----
NUC1       13C
P1         15.50 usec
P11        500.00 usec
P12        2000.00 usec
PL0        120.00 dB
PL1        -1.00 dB
SFO1       125.7942548 MHz
SP1        3.20 dB
SP2        3.20 dB
SFOFF[1]   Crp60,0.5,30.1
SFOFF[2]   Crp60comp,4
SFOFF1     0 Hz
SFOFF2     0 Hz

----- CHANNEL f2 -----
CPDPRG2    waltz16
NUC2       1H
PCPD2     100.00 usec
PL2        1.60 dB
PL12       24.60 dB
SFO2       500.225011 MHz

----- GRADIENT CHANNEL -----
GPNAM[1]   SINE.100
GPNAM[2]   SINE.100
GPX1       0 %
GPX2       0 %
GPY1       0 %
GPY2       0 %
GPZ1       30.00 %
GPZ2       50.00 %
p15        500.00 usec
p16        1000.00 usec

F2 - Processing parameters
SI         65536
SF         125.7804071 MHz
WDW        EM
SSB        0
LB         1.00 Hz
GB         0
PC         2.00

```

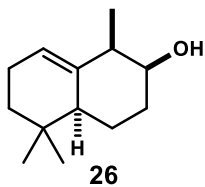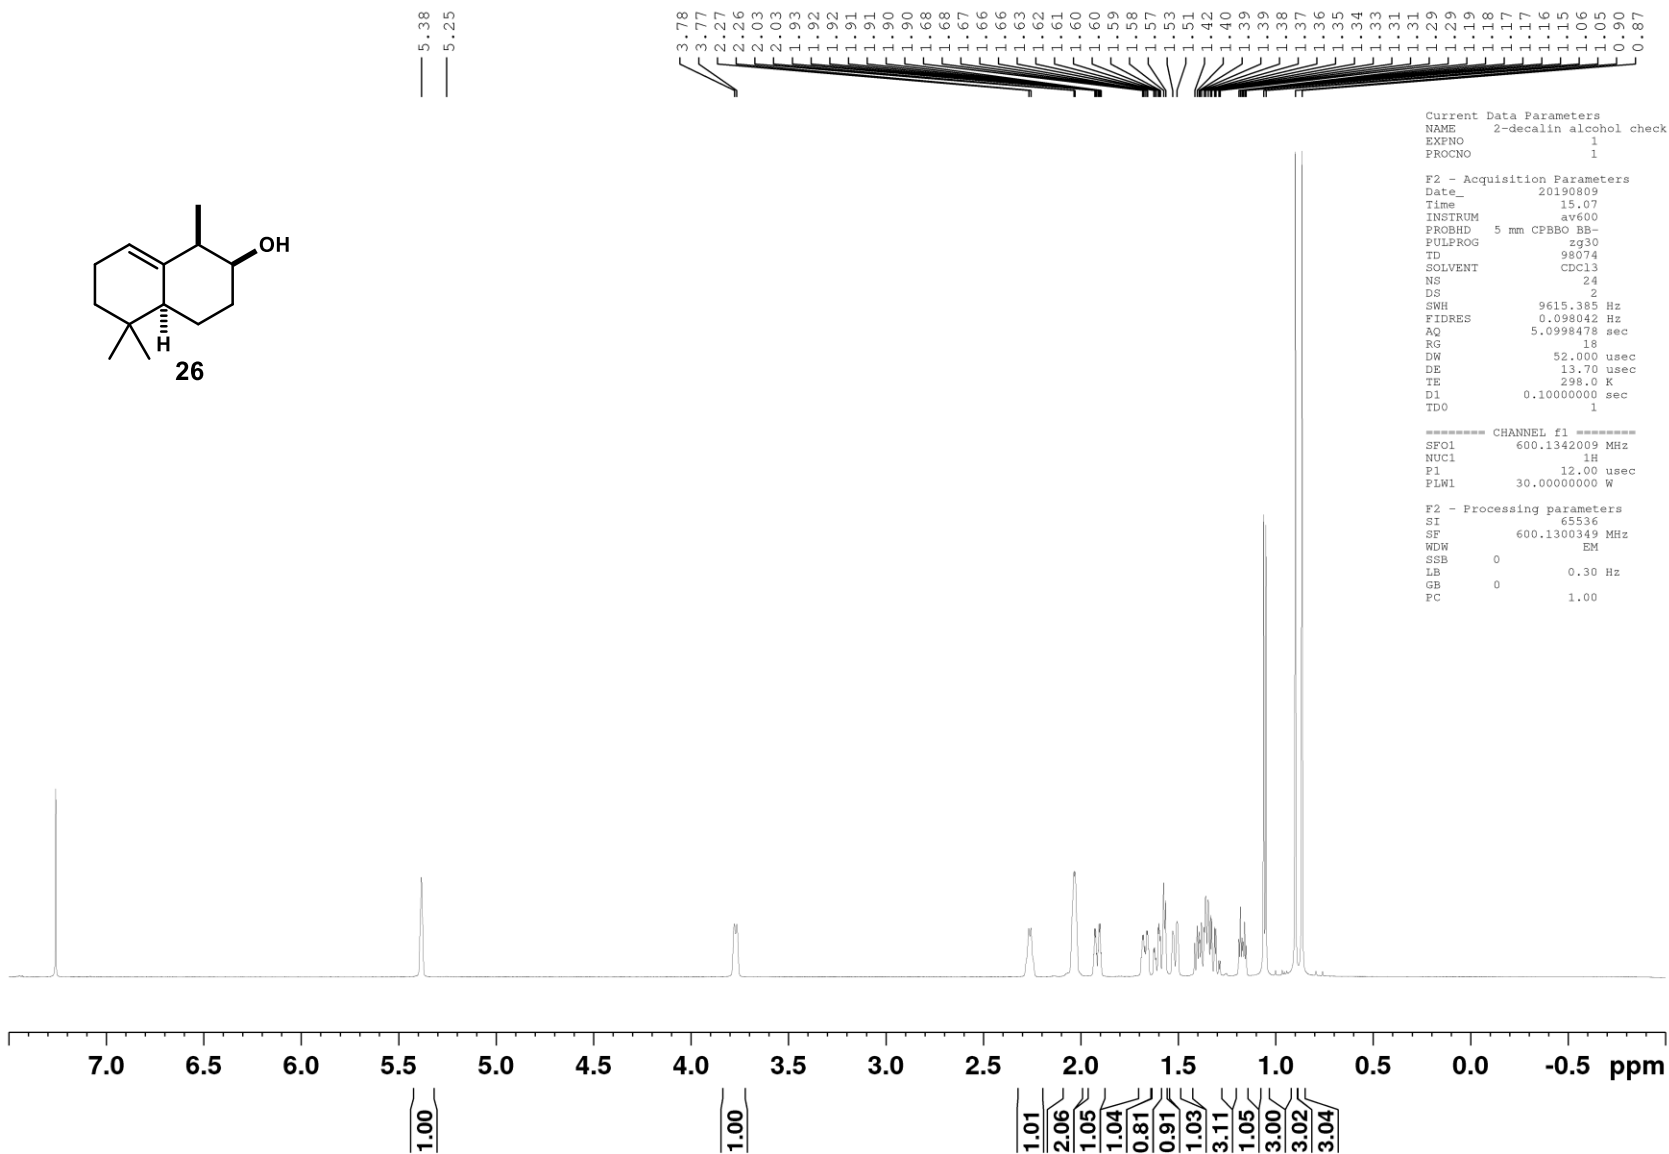



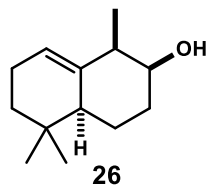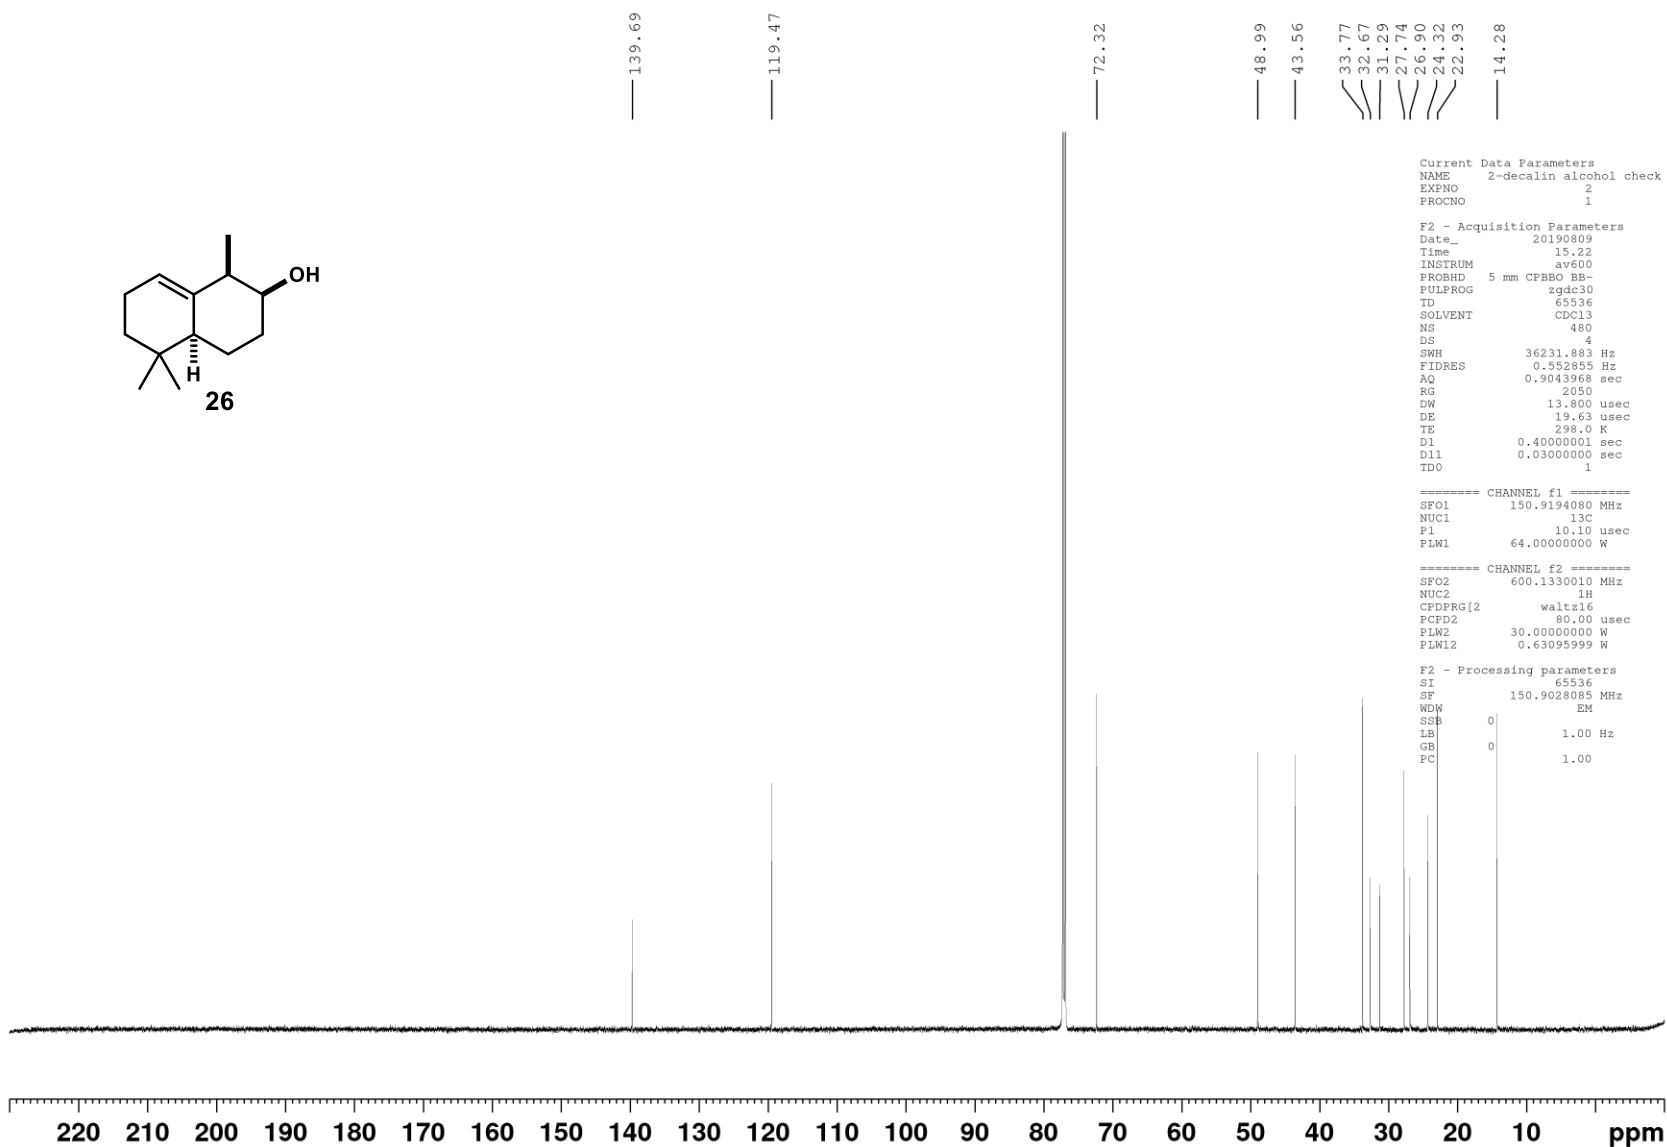

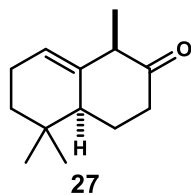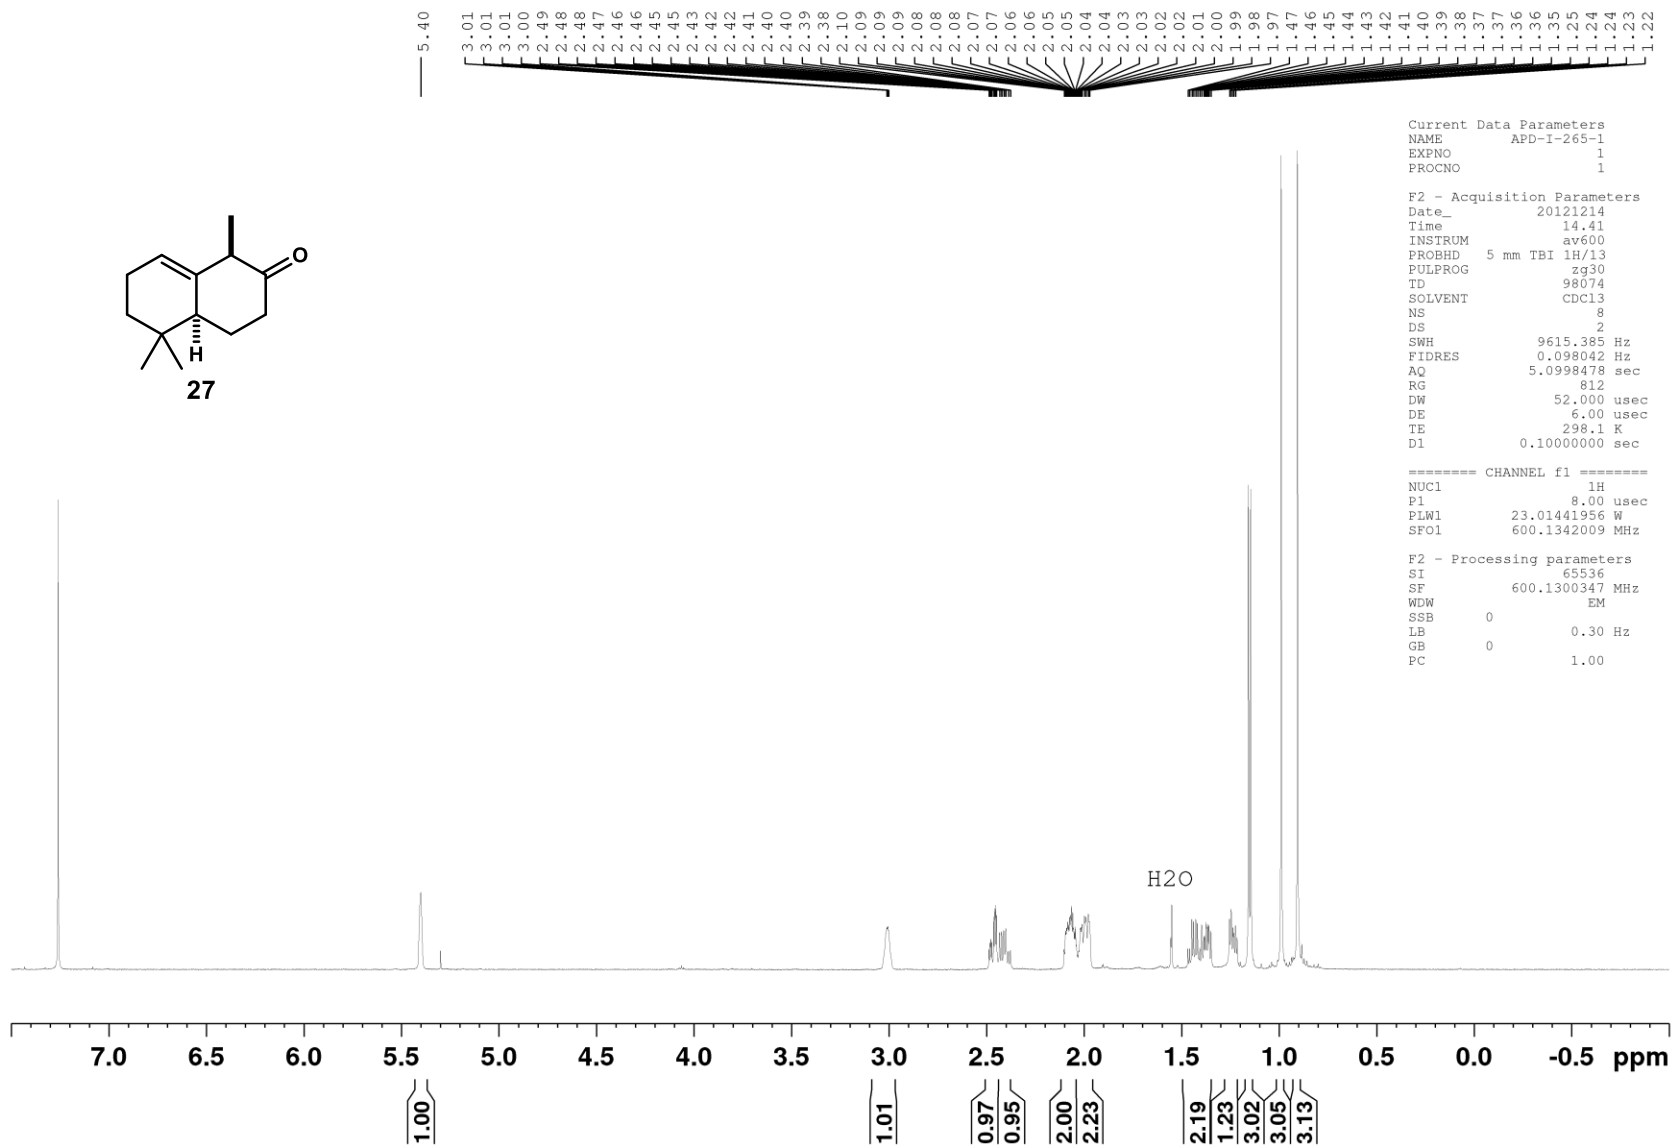

210.87

139.04

118.52

52.21

48.00

41.13

32.91

31.75

28.08

27.69

26.44

23.09

10.49

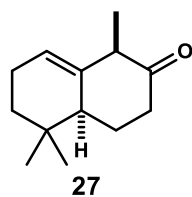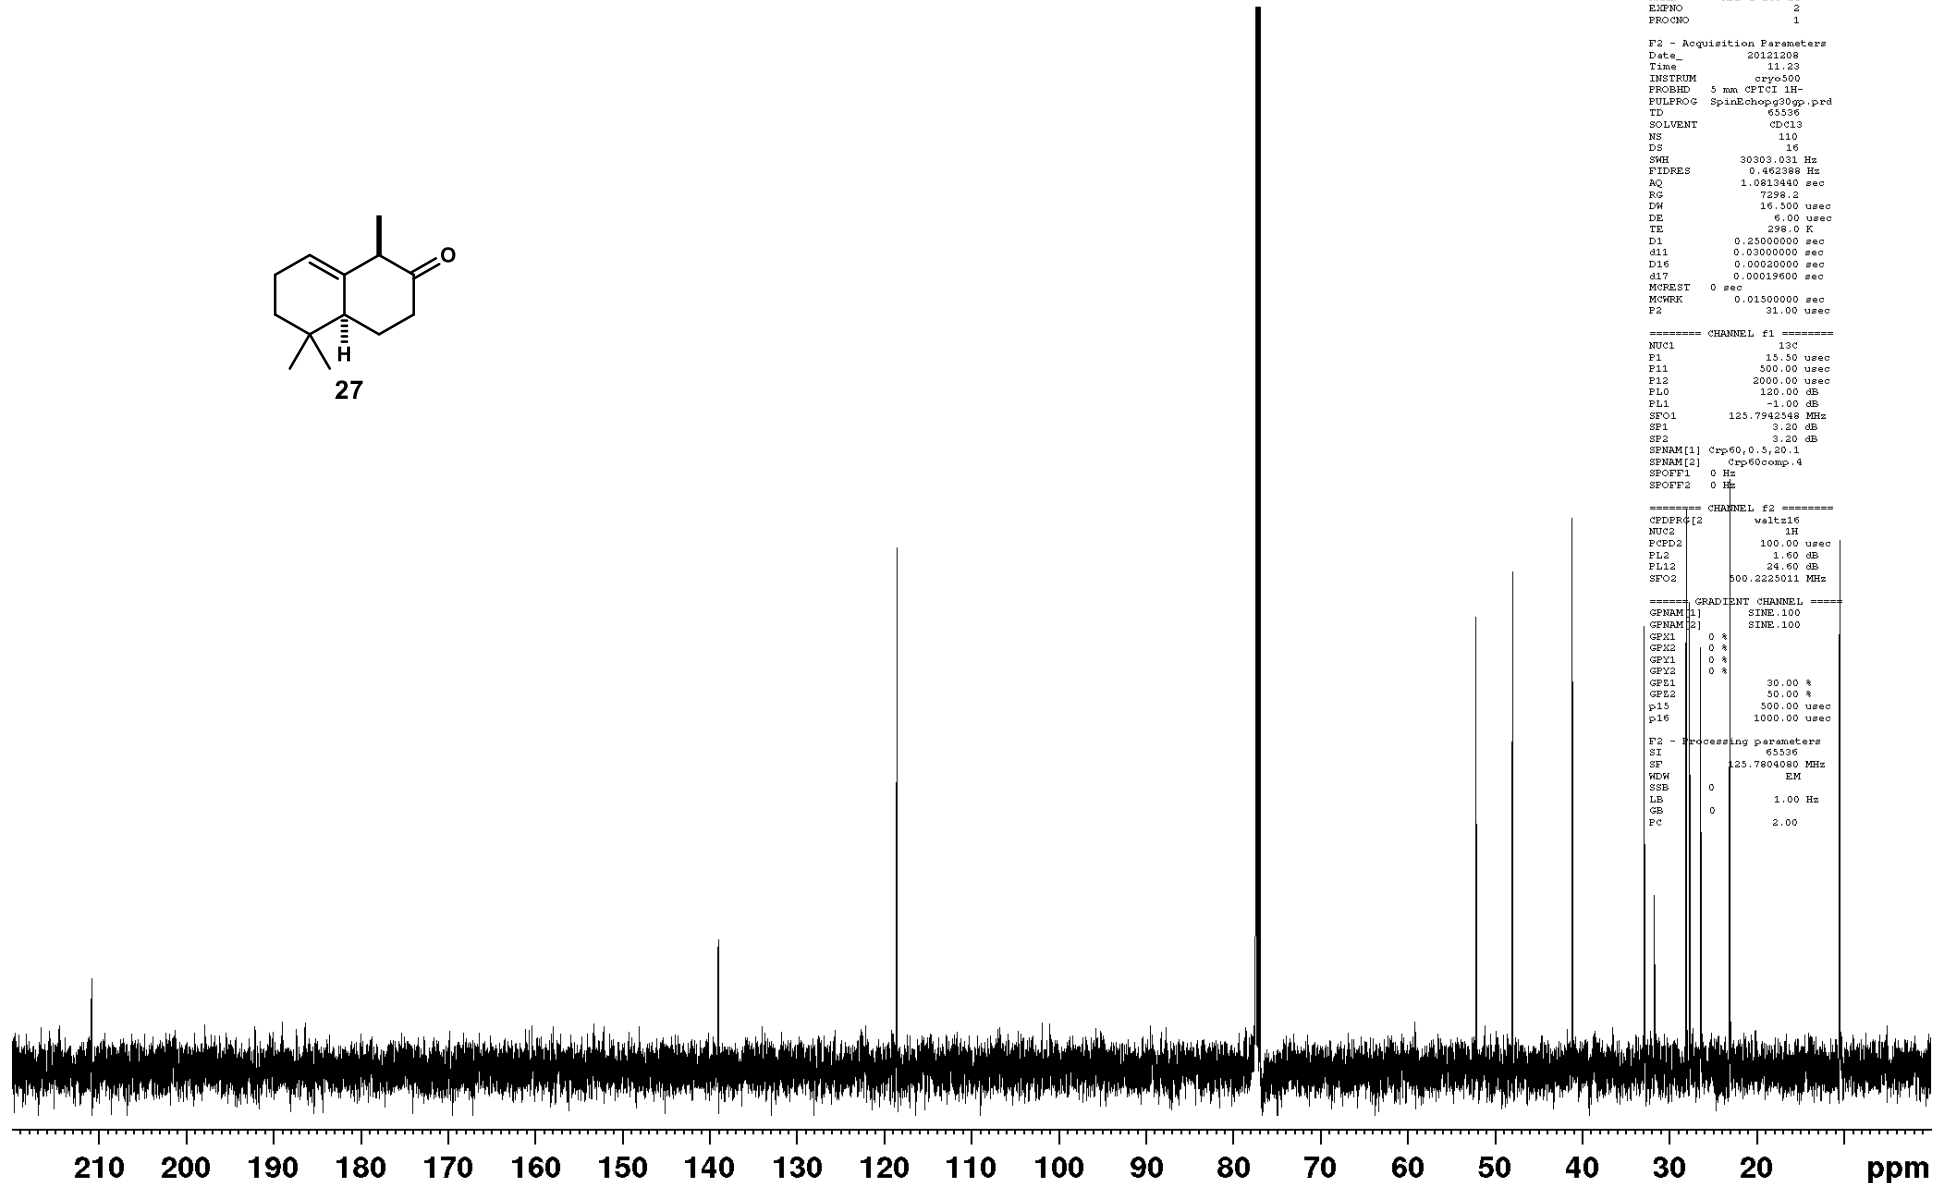

```

Current Data Parameters
NAME      APD-I-230-1a
EXPNO     2
PROCNO    1

F2 - Acquisition Parameters
Date_     20121208
Time      11.23
INSTRUM   cryo500
PROBHD    5 mm CPXI 1H-
PULPROG   SpinEchoq30pp.prd
TD         65536
SOLVENT   CDCl3
NS         110
DS         16
SWH        30303.031 Hz
FIDRES     0.462368 Hz
AQ         1.0813440 sec
RG         7298.2
DM         16.500 usec
DE         6.00 usec
TE         298.0 K
D1         0.25000000 sec
d11        0.03000000 sec
D16        0.00200000 sec
d17        0.00019600 sec
MORST      0 sec
MORWK      0.01500000 sec
F2         31.00 usec

===== CHANNEL f1 =====
NUC1       13C
P1         15.50 usec
PL1        500.00 usec
PI2        2000.00 usec
PL0        120.00 dB
PL1        -1.00 dB
SFO1       125.7942548 MHz
SF1        3.20 dB
SF2        3.20 dB
SENAM[1]   Crp60,0.5,20.1
SENAM[2]   -Crp60comp.4
SFOFF1     0 Hz
SFOFF2     0 Hz

===== CHANNEL f2 =====
CPDPRG2    waltz16
NUC2       1H
PCPD2      100.00 usec
PI2        1.60 dB
PL12       24.60 dB
SFO2       500.2225011 MHz

===== GRADIENT CHANNEL =====
GENAM[1]   SINE.100
GENAM[2]   SINE.100
GFX1       0 %
GFX2       0 %
GFX1       0 %
GFX2       0 %
GFX1       30.00 %
GFX2       50.00 %
p15        500.00 usec
p16        1000.00 usec

F2 - Processing parameters
SI         65536
SF         125.7804080 MHz
WDW        EM
SSB        0
LB         1.00 Hz
GB         0
PC         2.00

```

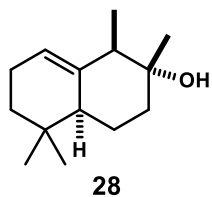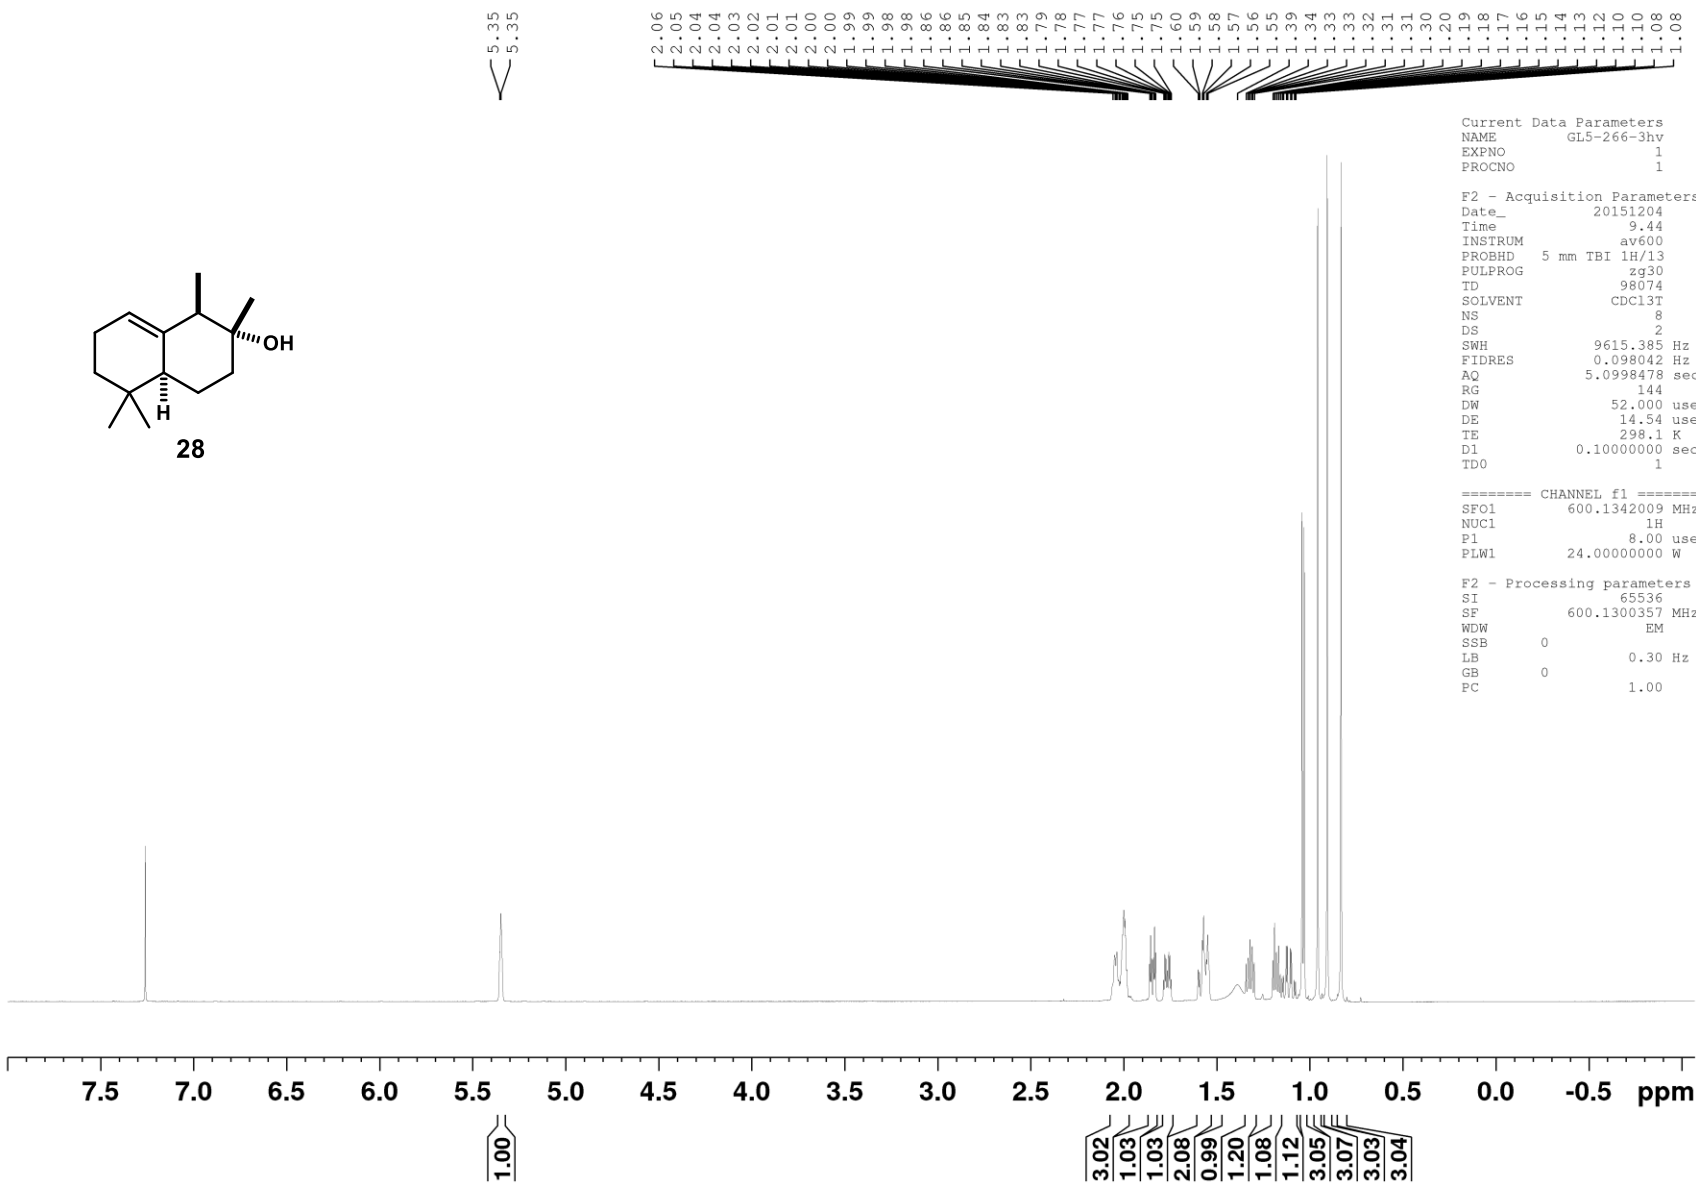

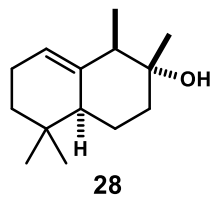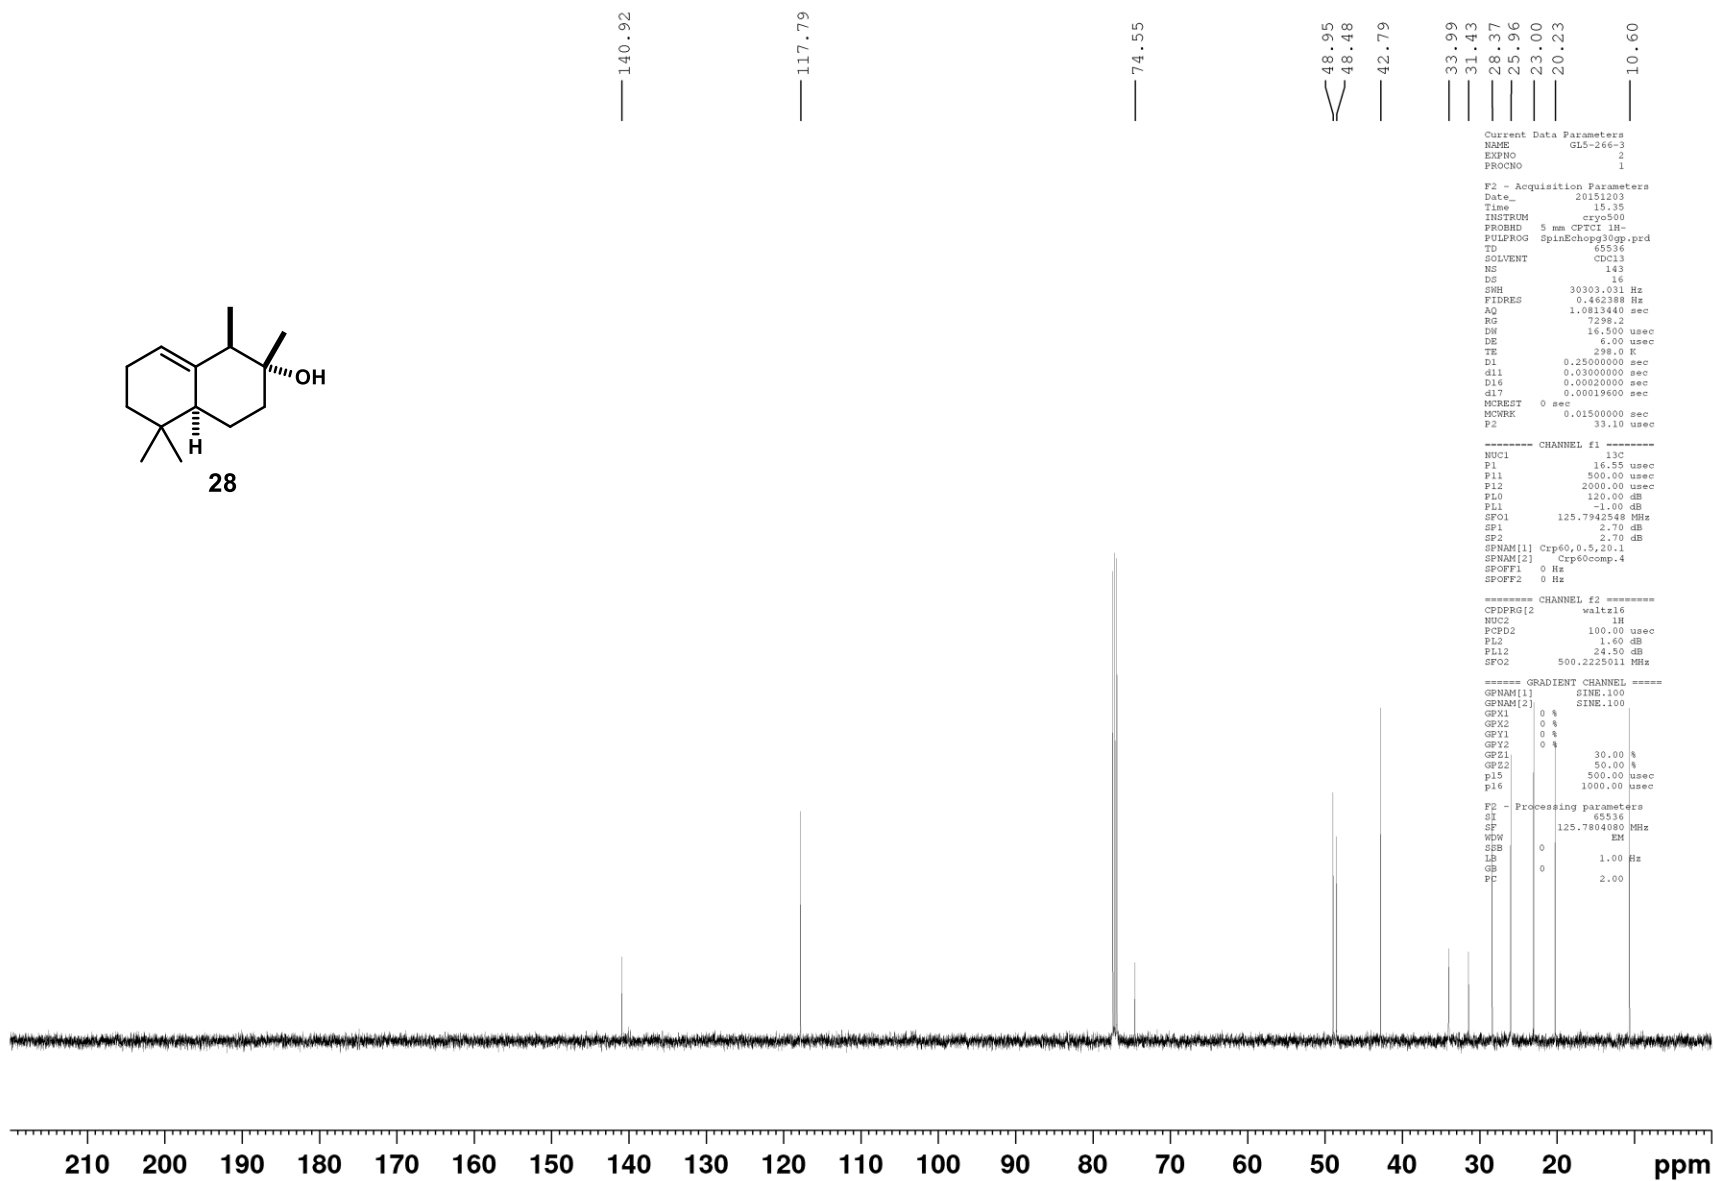

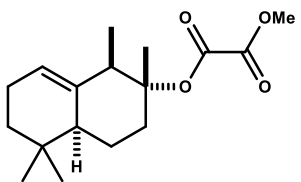

S4

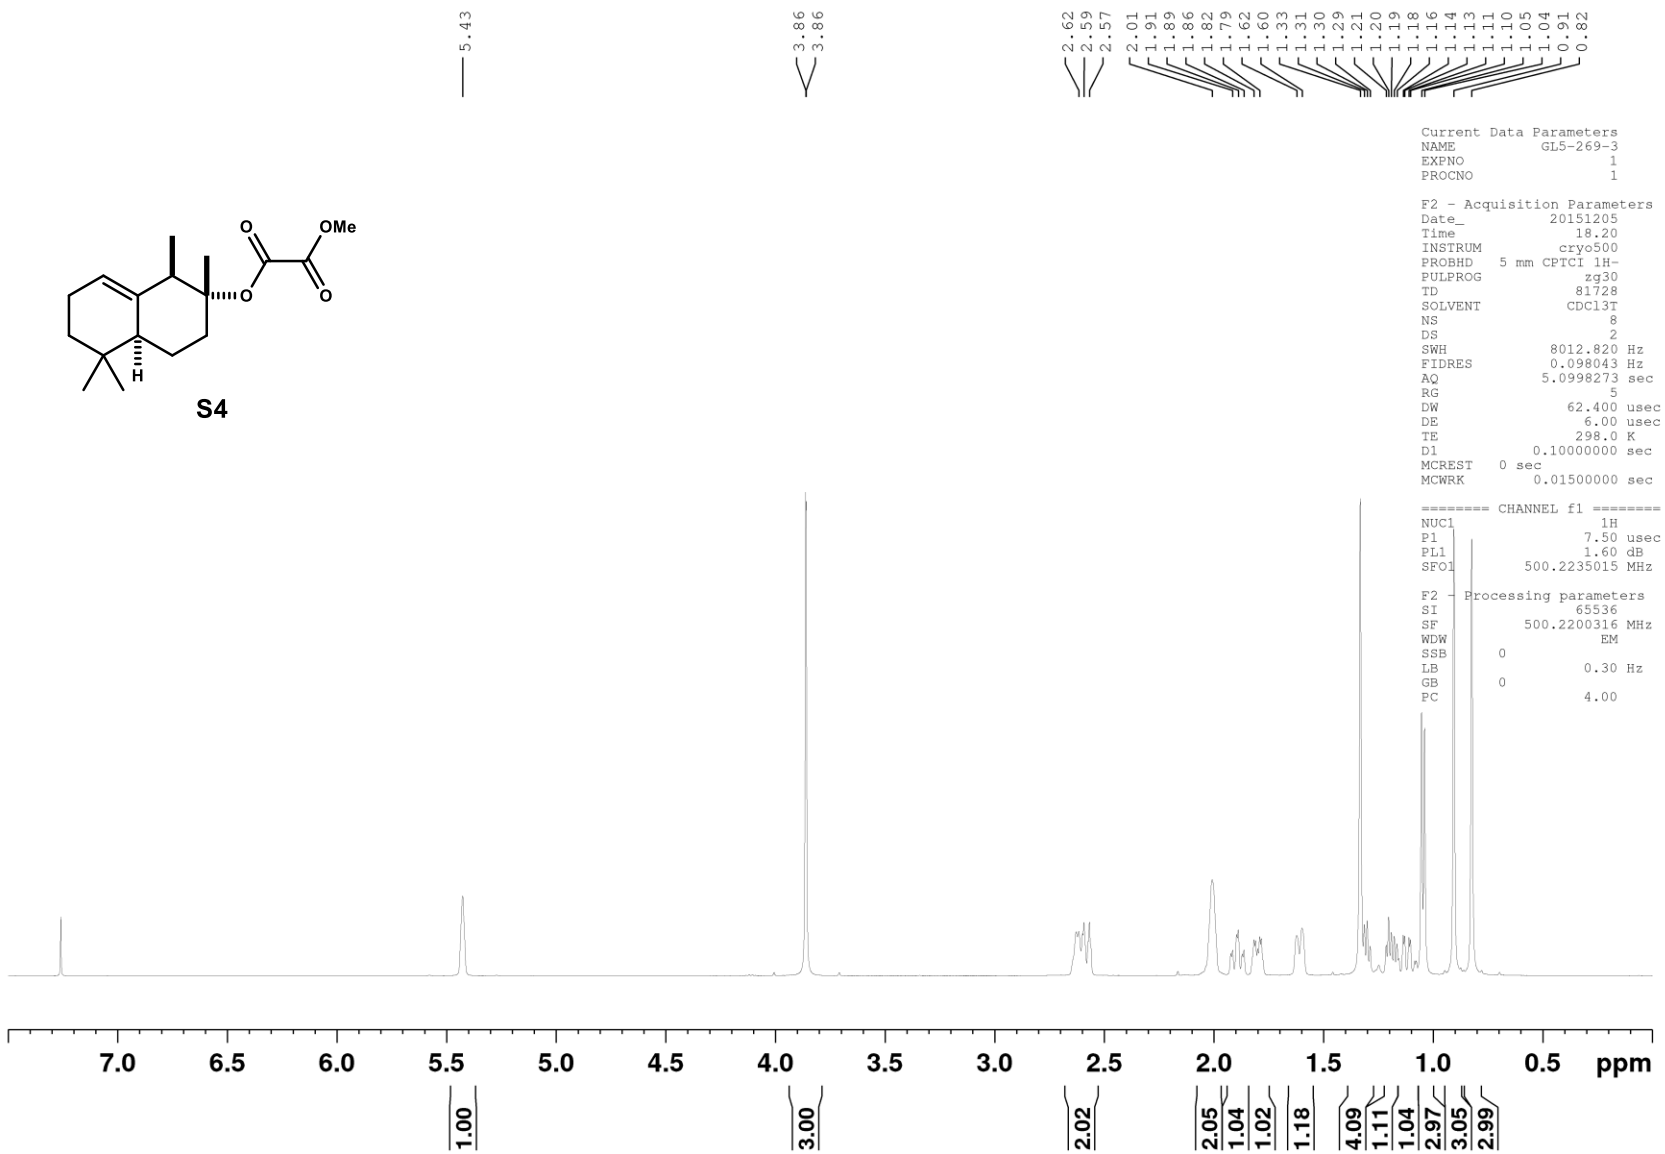

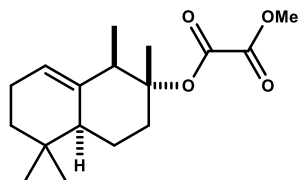

S4

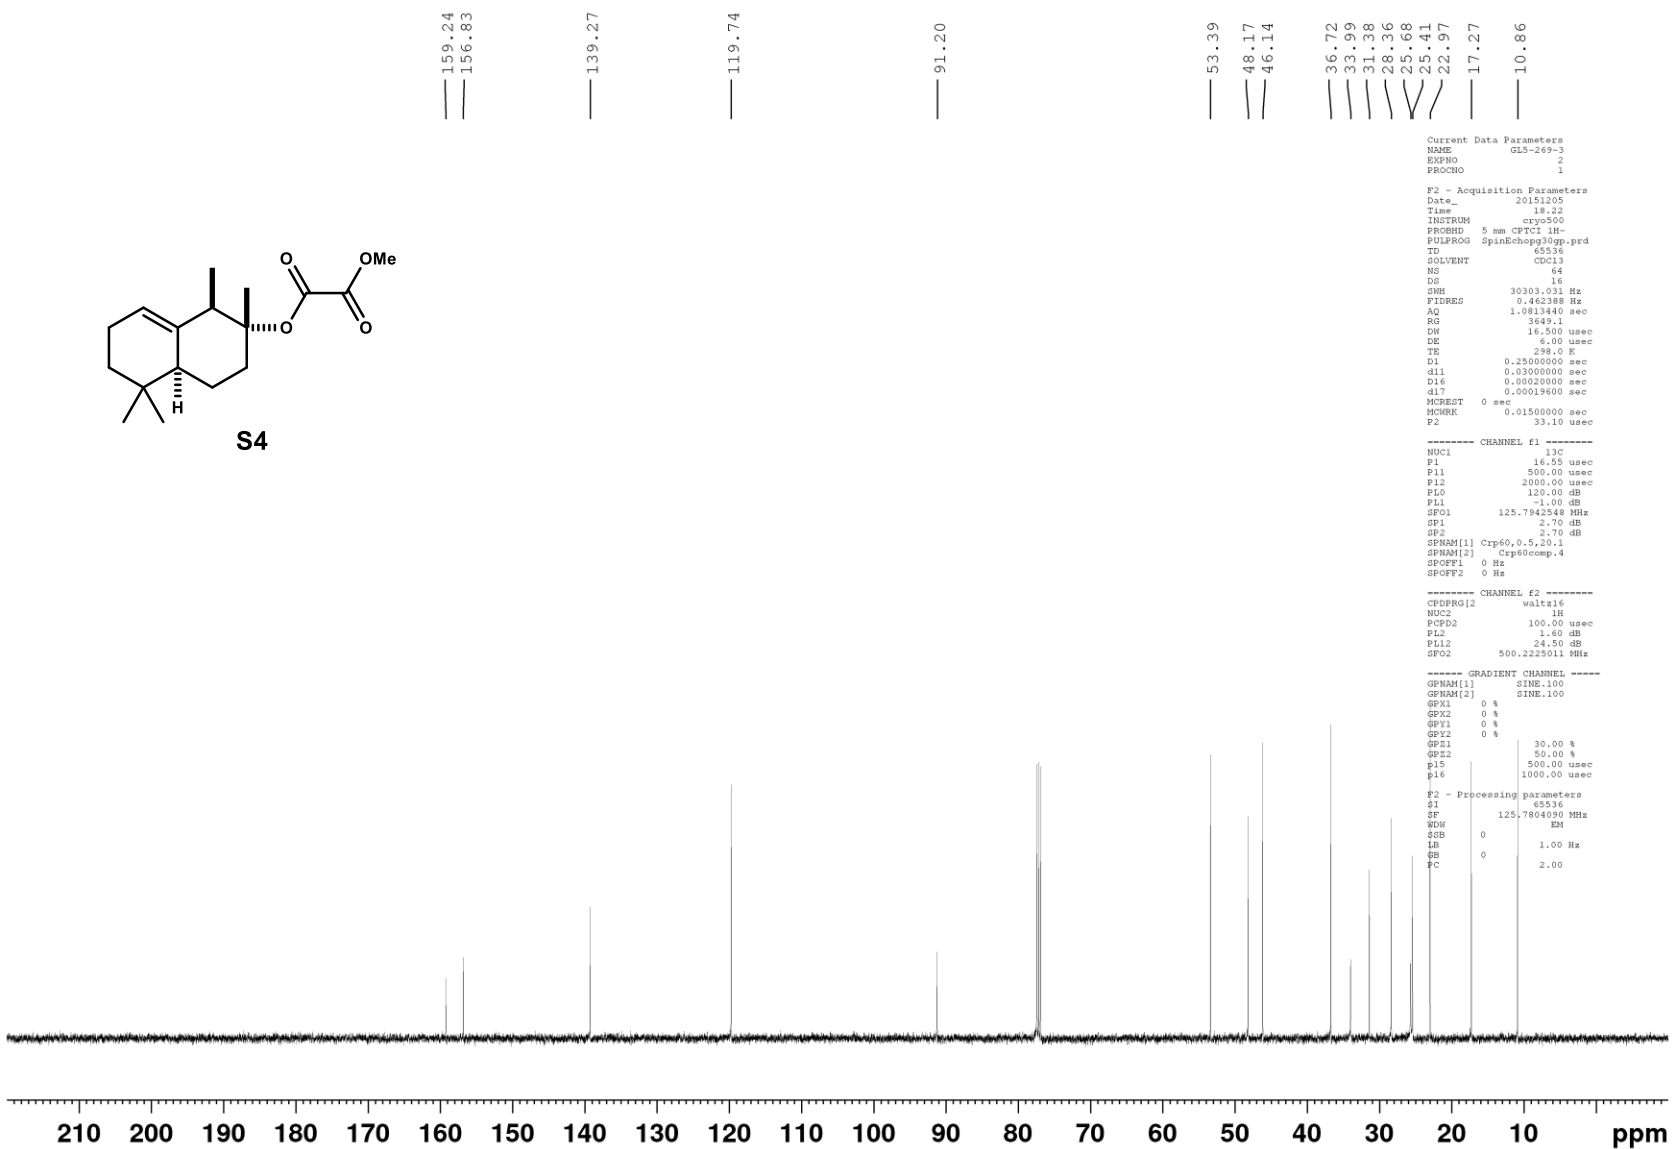

```

Current Data Parameters
NAME          GL5-269-3
EXPNO        2
PROCNO       1

F2 - Acquisition Parameters
Date_        20151205
Time         18.22
INSTRUM      crys500
PROBHD       5 mm CPTCI 1H-
PULPROG      SpinEcho30pp.prd
TD           65536
SOLVENT      CDCl3
NS           64
DS           16
SWH          30303.031 Hz
FIDRES       0.462388 Hz
AQ           1.0813440 sec
RG           3049.1
DW           16.500 usec
DE           6.00 usec
TE           298.0 K
D1           0.25000000 sec
d11          0.03000000 sec
D16          0.00020000 sec
d17          0.00019600 sec
MCRET       0 sec
MCHRT       0.01500000 sec
P2           33.10 usec

----- CHANNEL f1 -----
NUC1         13C
P1           16.55 usec
P11          500.00 usec
P12          2000.00 usec
PLO          150.00 dB
PL1          -1.00 dB
SFO1        125.7942348 MHz
SF1          2.70 dB
SF2          2.70 dB
SFO2        Ccp60,0.5,20.1
SF22        Ccp60comp.4
SFOFF1      0 Hz
SFOFF2      0 Hz

----- CHANNEL f2 -----
CPDPRG2     waltz16
NUC2         1H
PCPD2       100.00 usec
PL2         1.60 dB
PL12        24.50 dB
SFO2        500.2289011 MHz

----- GRADIENT CHANNEL -----
GPNAM[1]    SINE.100
GPNAM[2]    SINE.100
GFX1        0 %
GFX2        0 %
GFI1        0 %
GFI2        0 %
GPE1        30.00 %
GPE2        50.00 %
p15         500.00 usec
p16         1000.00 usec

F2 - Processing parameters
SI          65536
SF          125.7804090 MHz
WDW         EM
SSB         0
LB          1.00 Hz
GB          0
PC          2.00

```

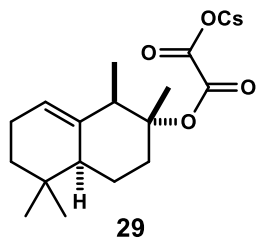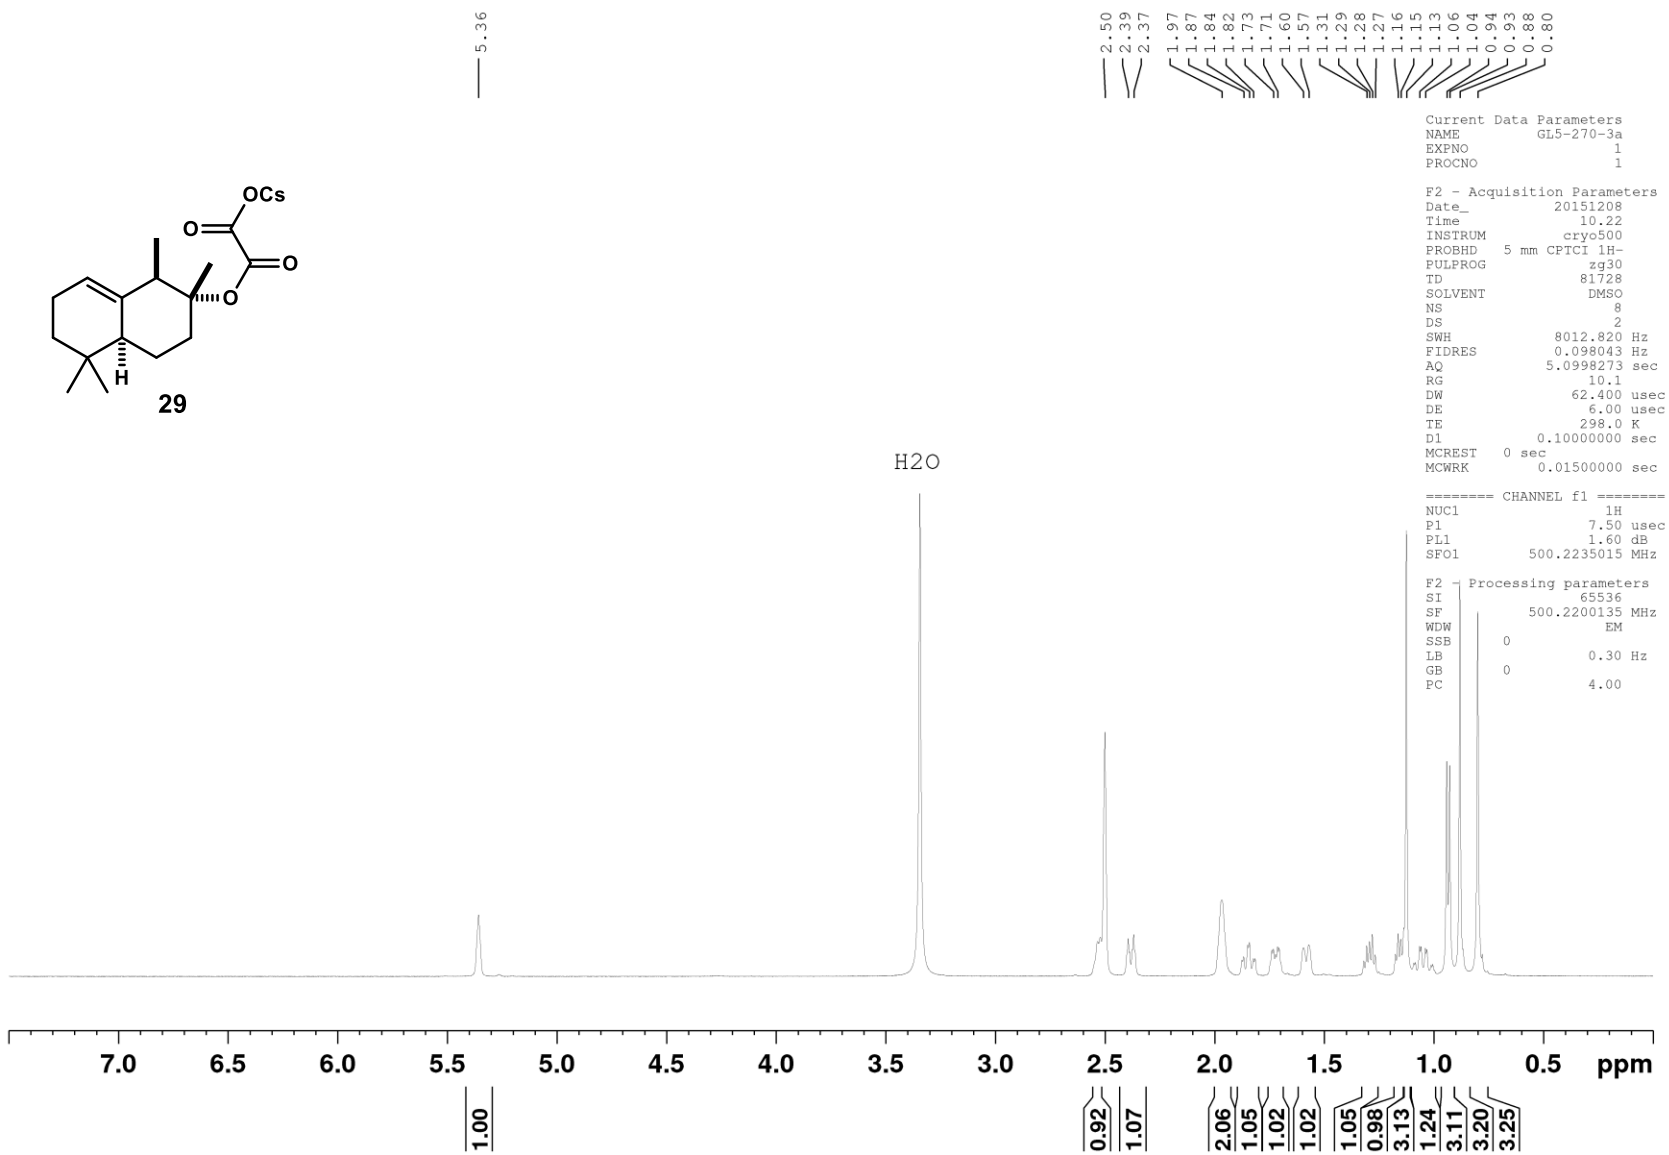



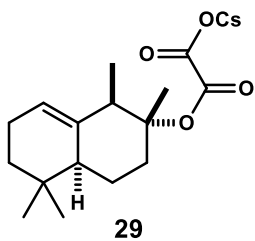

— 167.49  
— 163.44

— 139.85

— 118.02

— 83.72

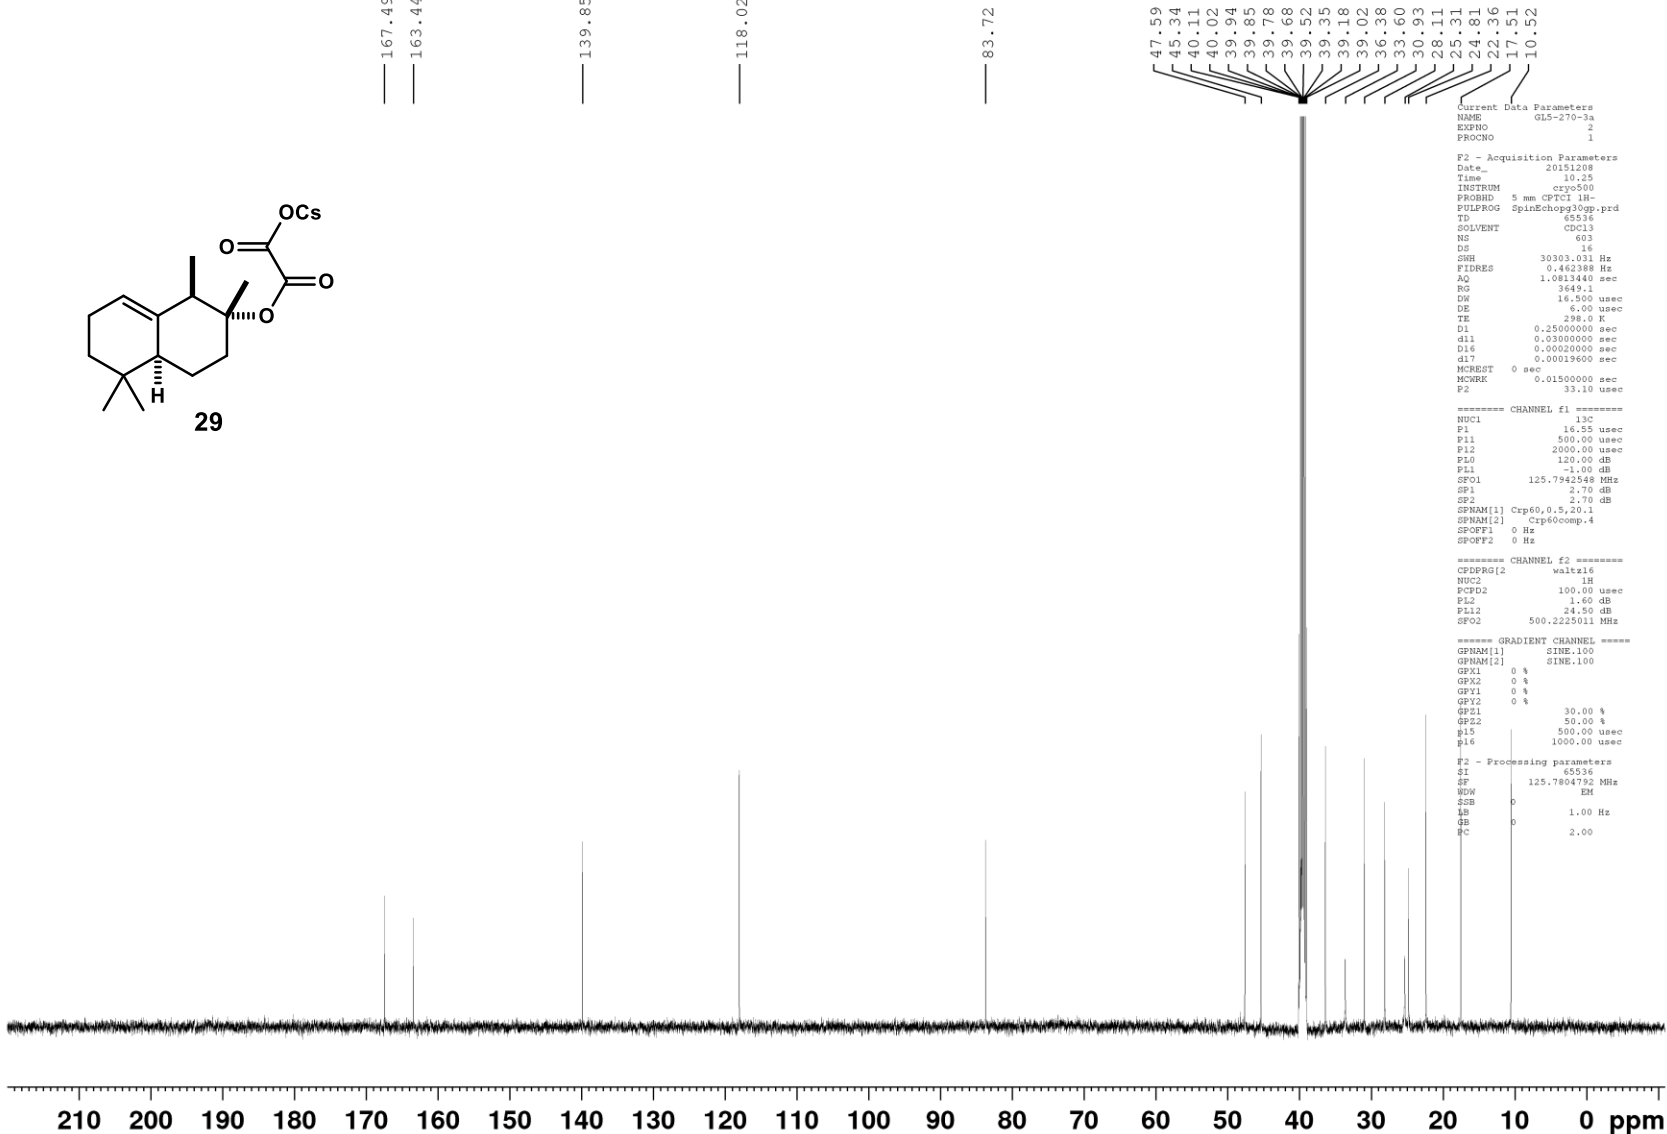

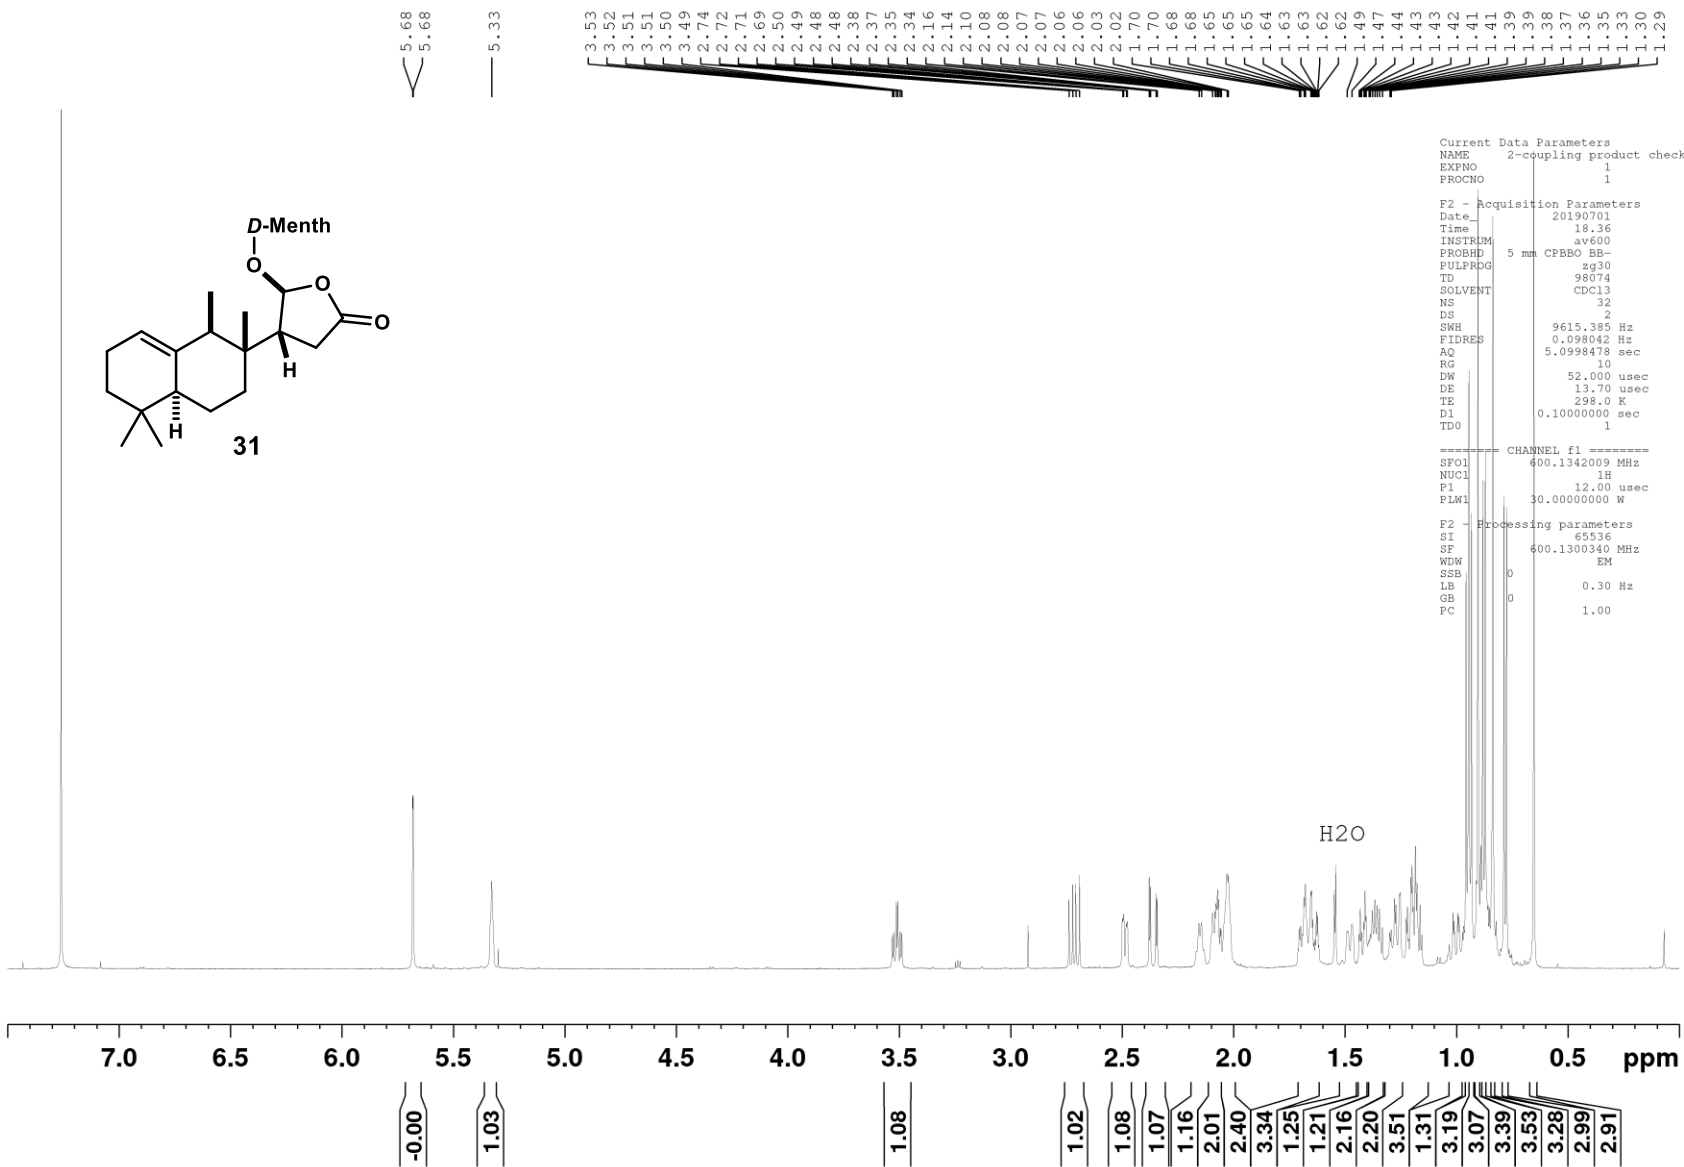

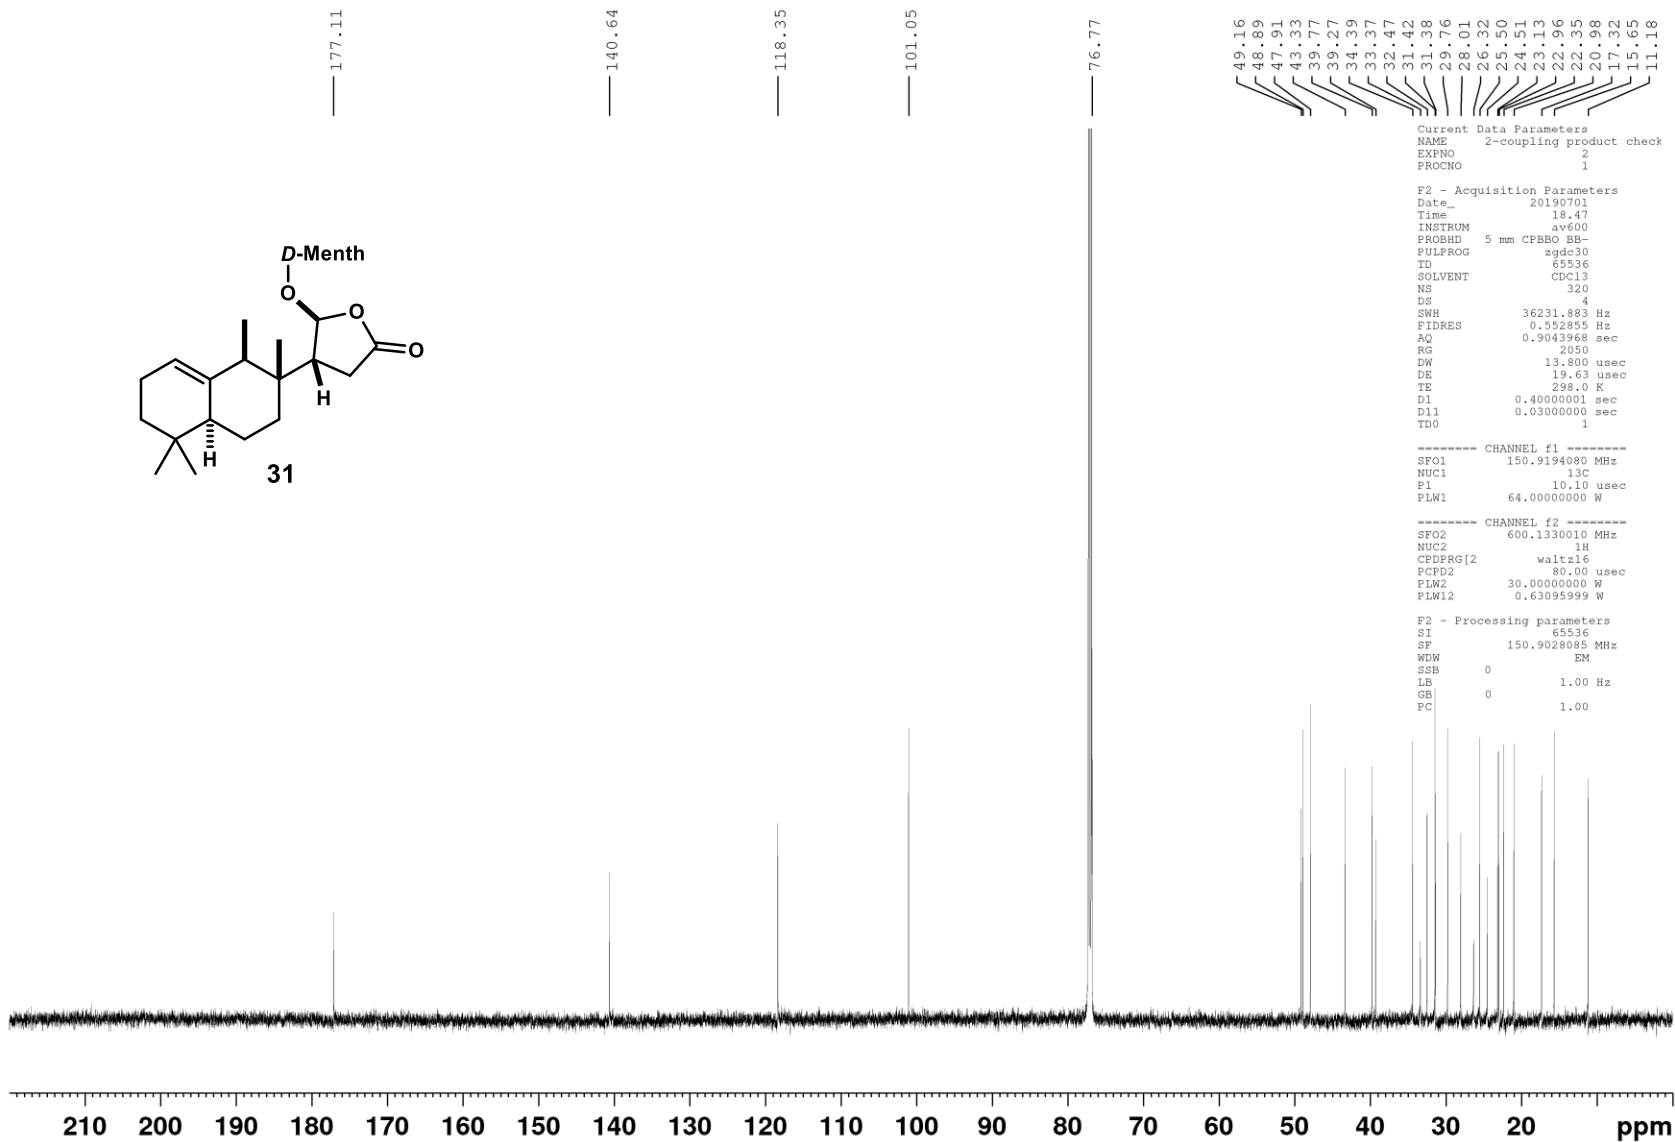

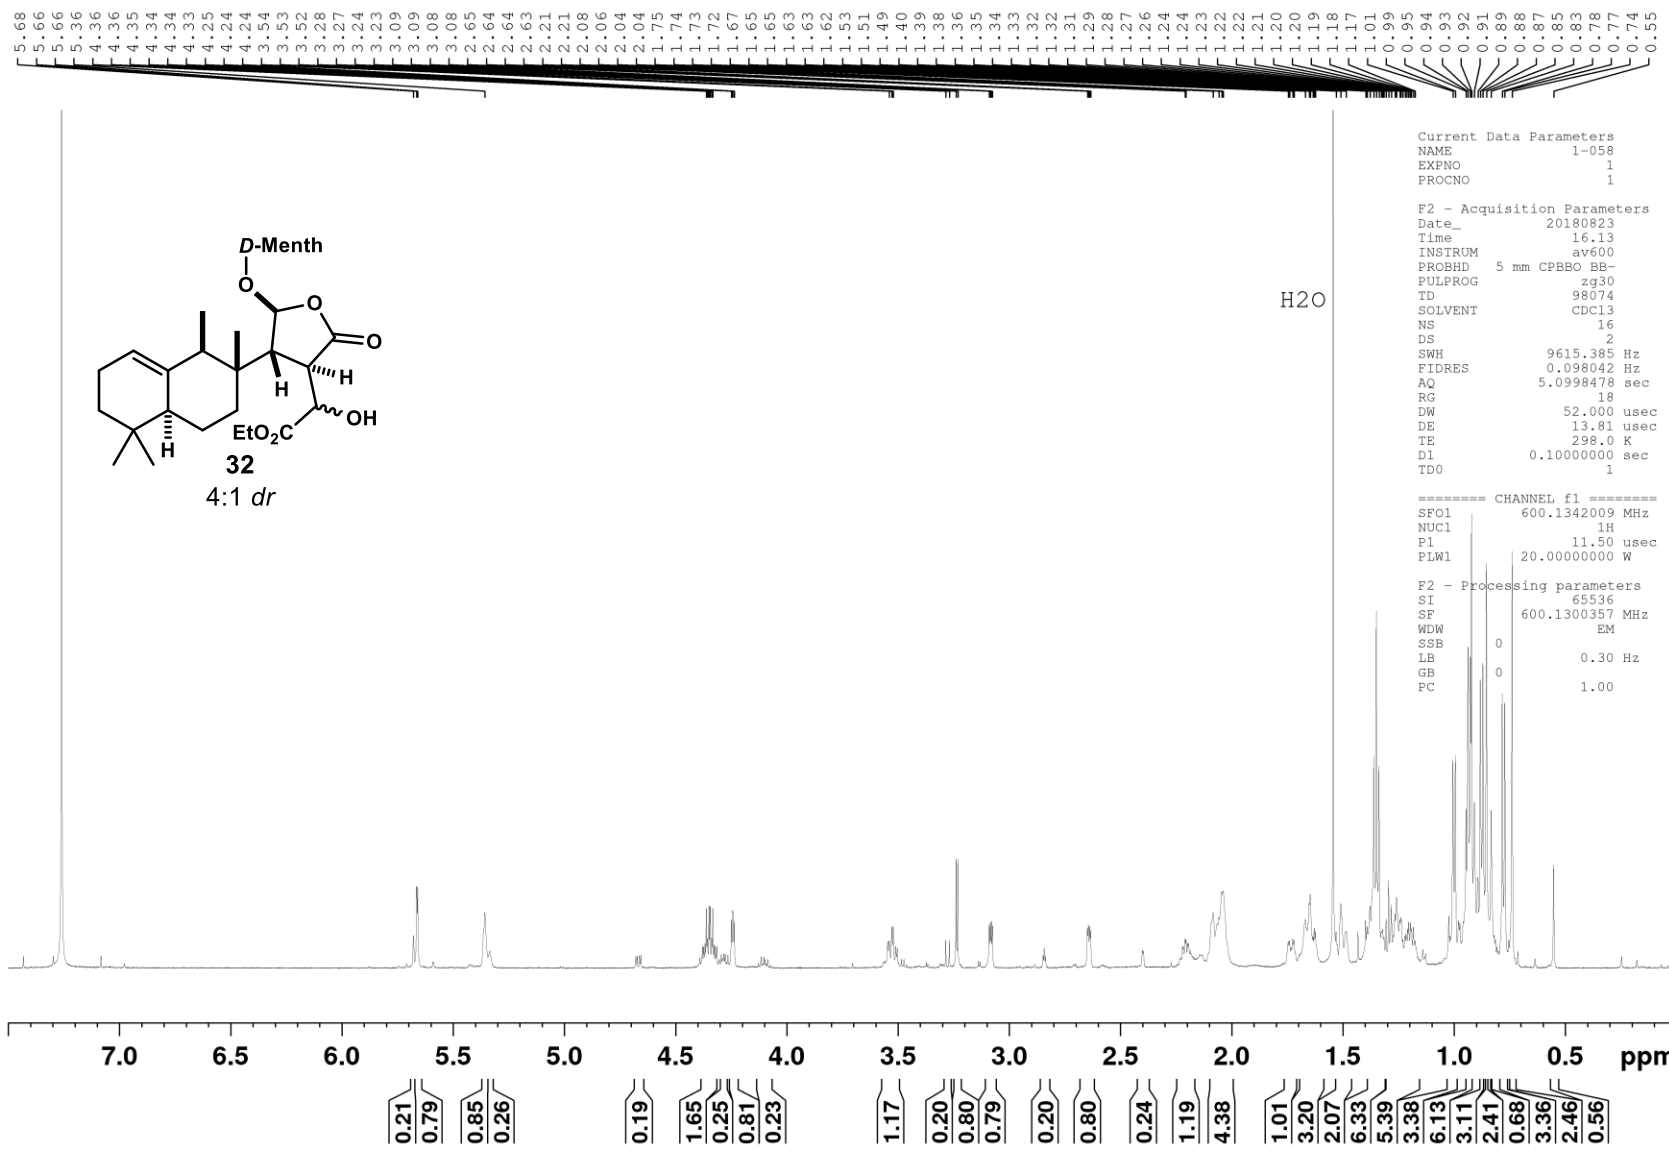

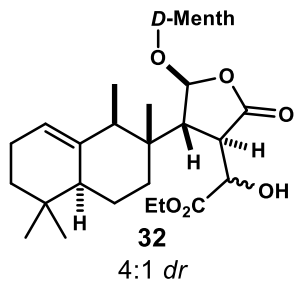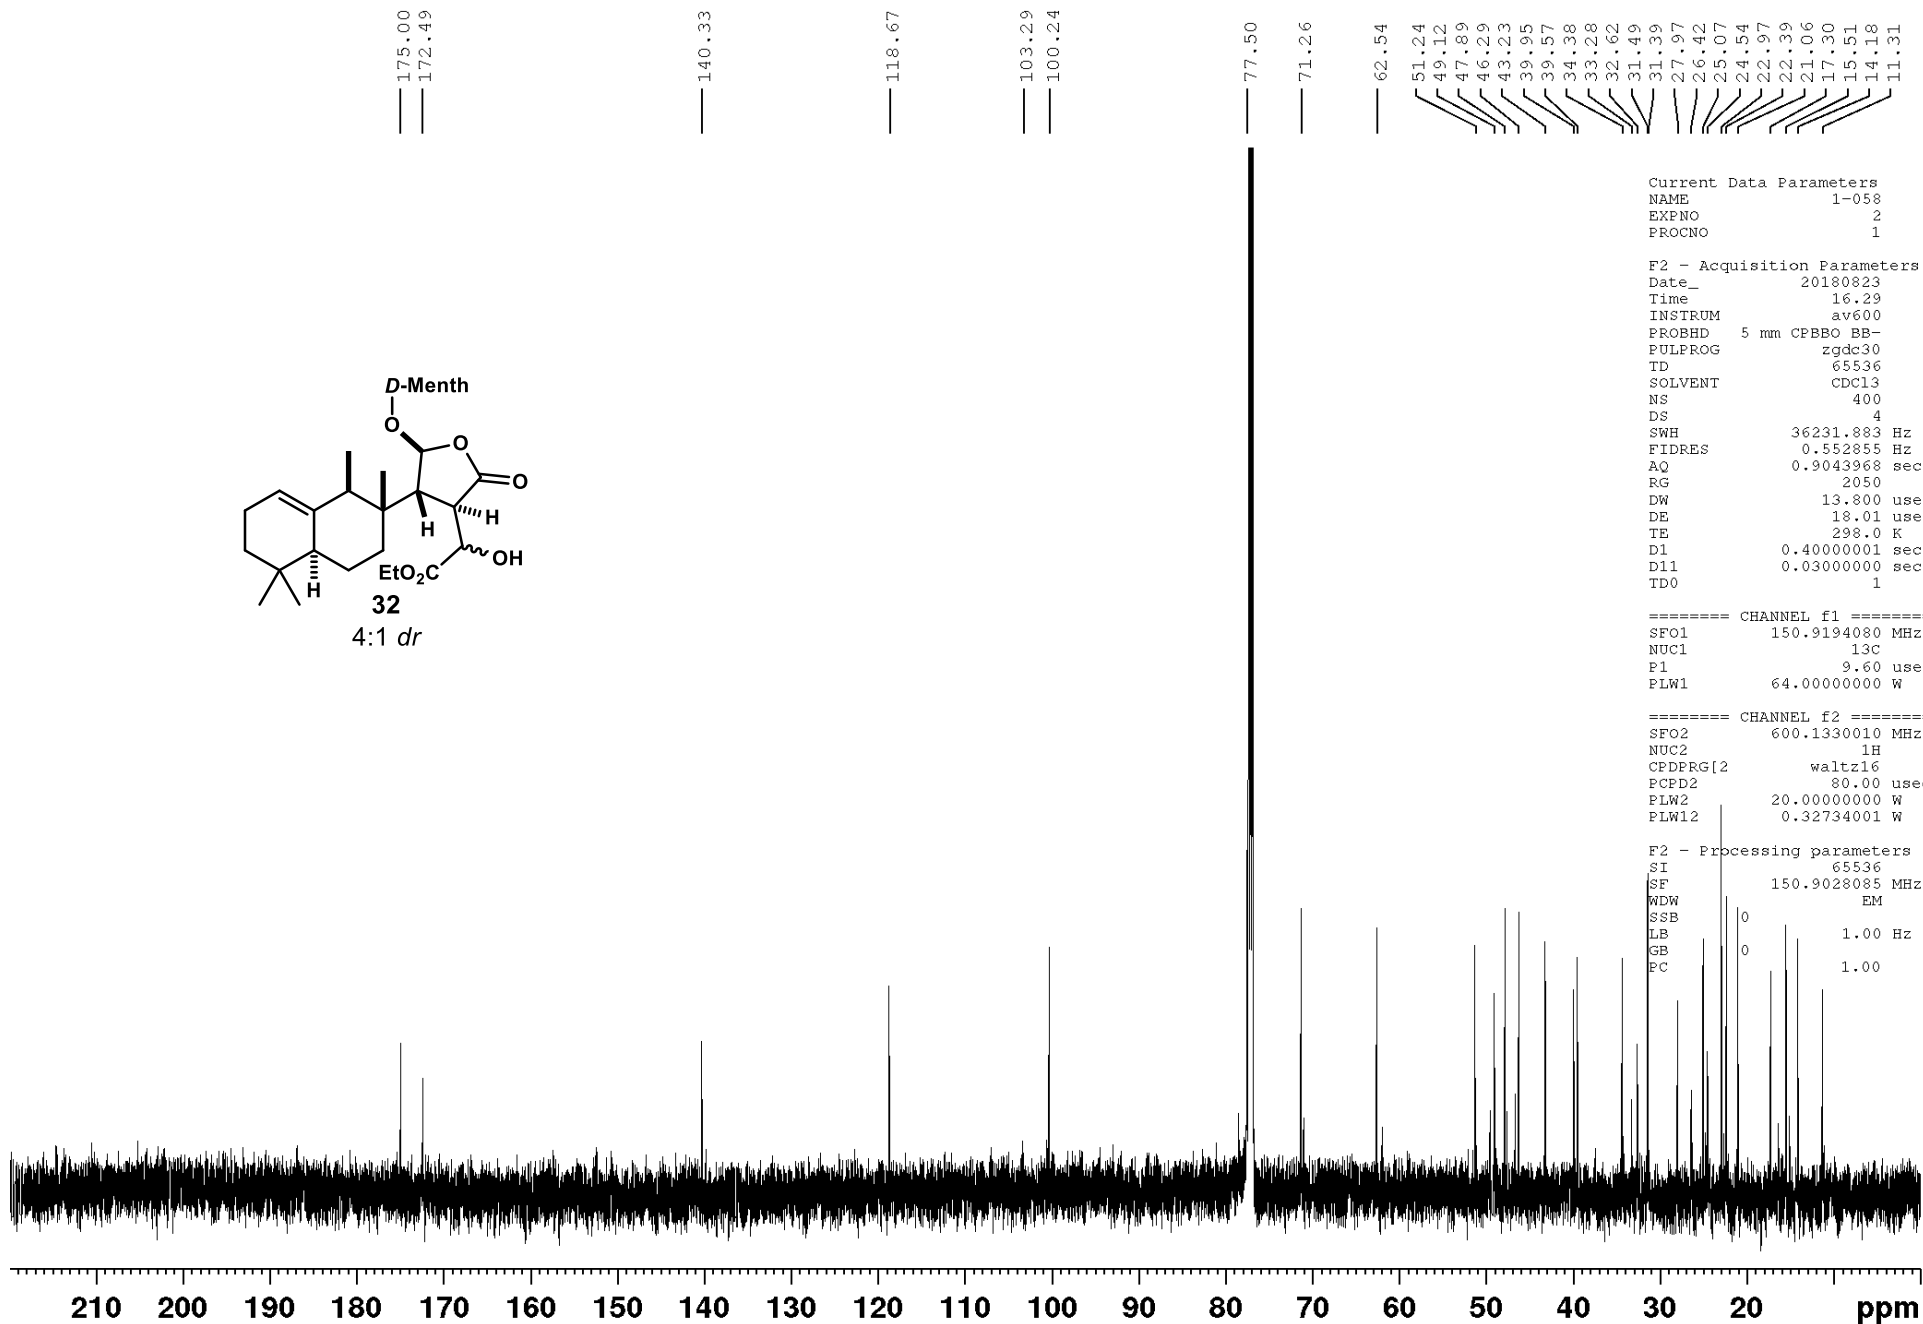

Current Data Parameters  
NAME 1-058  
EXPNO 2  
PROCNO 1

F2 - Acquisition Parameters  
Date\_ 20180823  
Time 16.29  
INSTRUM av600  
PROBHD 5 mm CPBBO BB-  
PULPROG zgdc30  
TD 65536  
SOLVENT CDCl3  
NS 400  
DS 4  
SWH 36231.883 Hz  
FIDRES 0.552855 Hz  
AQ 0.9043968 sec  
RG 2050  
DW 13.800 usec  
DE 18.01 usec  
TE 298.0 K  
D1 0.40000001 sec  
D11 0.03000000 sec  
TD0 1

==== CHANNEL f1 =====  
SFO1 150.9194080 MHz  
NUC1 13C  
P1 9.60 usec  
PLW1 64.00000000 W

==== CHANNEL f2 =====  
SFO2 600.1330010 MHz  
NUC2 1H  
CPDPRG2 waltz16  
PCPD2 80.00 usec  
PLW2 20.00000000 W  
PLW12 0.32734001 W

F2 - Processing parameters  
SI 65536  
SF 150.9028085 MHz  
WDW EM  
SSB 0  
LB 1.00 Hz  
GB 0  
PC 1.00

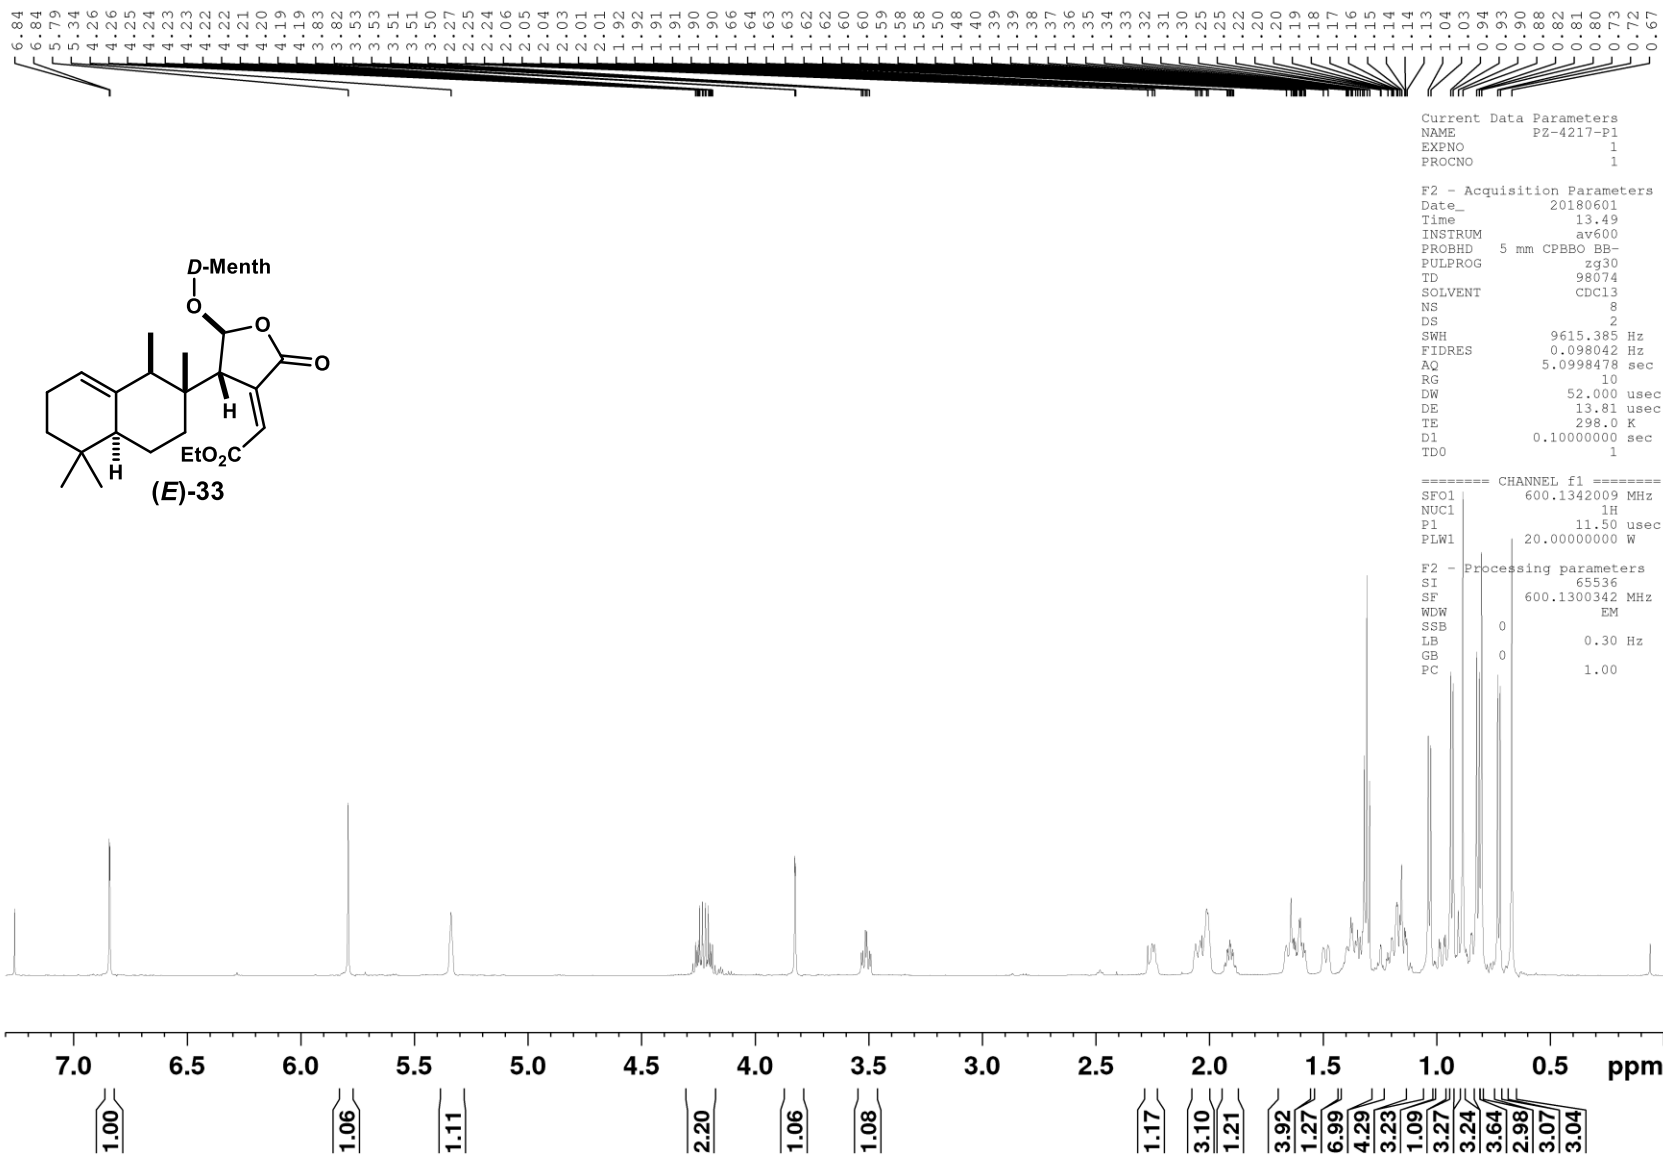

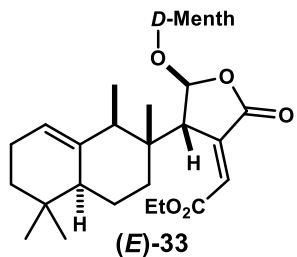

— 170.61  
— 165.45

— 143.22  
— 140.41

— 127.05  
— 118.63

— 100.10

— 77.12

— 61.10  
— 51.80  
— 49.18  
— 47.55  
— 43.69  
— 43.58  
— 39.85  
— 34.33  
— 33.72  
— 33.37  
— 31.45  
— 31.38  
— 27.99  
— 26.21  
— 25.34  
— 24.22  
— 23.20  
— 22.93  
— 22.31  
— 20.84  
— 16.04  
— 15.59  
— 14.15  
— 11.40

Current Data Parameters  
 NAME PZ-4217-P1  
 EXPNO 2  
 PROCNO 1

F2 - Acquisition Parameters  
 Date\_ 20180601  
 Time 13.53  
 INSTRUM av600  
 PROBHD 5 mm CPBBO BB-  
 PULPROG zgdc30  
 TD 65536  
 SOLVENT CDCl3  
 NS 70  
 DS 4  
 SWH 36231.883 Hz  
 FIDRES 0.552855 Hz  
 AQ 0.9043968 sec  
 RG 2050  
 DW 13.800 usec  
 DE 18.01 usec  
 TE 298.0 K  
 D1 0.40000001 sec  
 D11 0.03000000 sec  
 TDO 1

===== CHANNEL f1 =====  
 SFO1 150.9194080 MHz  
 NUC1 13C  
 P1 9.60 usec  
 PLW1 64.00000000 W

===== CHANNEL f2 =====  
 SFO2 600.1330010 MHz  
 NUC2 1H  
 CPDPRG[2] waltz16  
 PCPD2 80.00 usec  
 PLW2 20.00000000 W  
 PLW12 0.32734001 W

F2 - Processing parameters  
 SI 65536  
 SF 150.9028085 MHz  
 WDW EM  
 SSB 0  
 LB 1.00 Hz  
 GB 0  
 PC 1.00

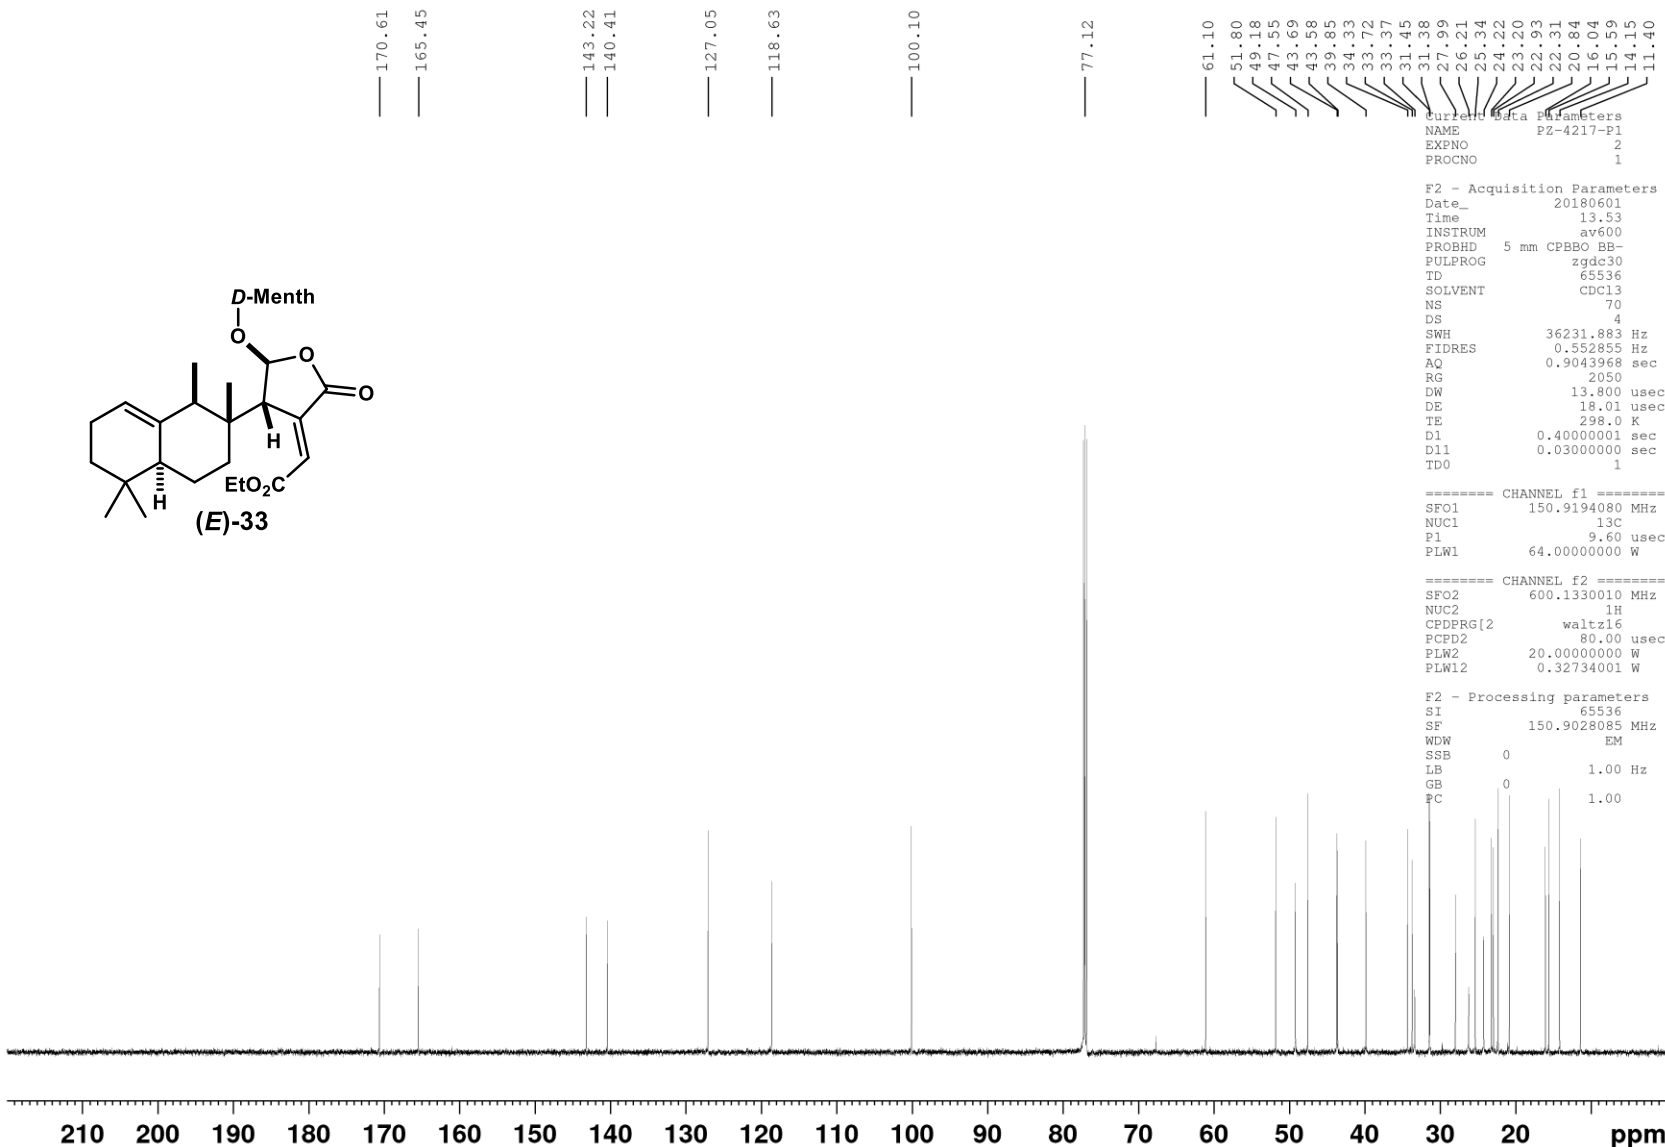

6.29  
6.28  
5.72  
5.35  
4.32  
4.31  
4.31  
4.30  
4.29  
4.29  
4.28  
4.28  
4.27  
4.26  
4.26  
4.25  
3.57  
3.56  
3.55  
3.55  
3.54  
3.53  
2.87  
2.87  
2.22  
2.21  
2.07  
2.06  
2.04  
2.03  
2.03  
2.02  
2.01  
2.01  
2.00  
2.00  
1.67  
1.65  
1.64  
1.63  
1.63  
1.62  
1.62  
1.60  
1.50  
1.48  
1.39  
1.37  
1.36  
1.35  
1.34  
1.34  
1.33  
1.32  
1.31  
1.30  
1.25  
1.21  
1.19  
1.18  
1.17  
1.16  
1.16  
1.15  
1.13  
1.01  
1.00  
0.99  
0.98  
0.97  
0.95  
0.94  
0.93  
0.92  
0.91  
0.89  
0.88  
0.88  
0.86  
0.85  
0.84  
0.83  
0.83  
0.82  
0.81  
0.77  
0.76

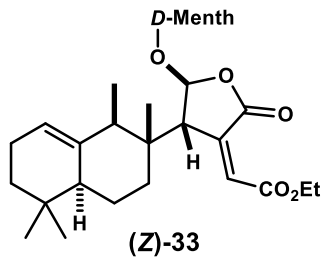

Current Data Parameters  
 NAME PZ-4217-P2  
 EXPNO 1  
 PROCNO 1

F2 - Acquisition Parameters  
 Date\_ 20180601  
 Time 13.38  
 INSTRUM av600  
 PROBHD 5 mm CPBBO BB-  
 PULPROG zg30  
 TD 98074  
 SOLVENT CDCl3  
 NS 8  
 DS 2  
 SWH 9615.385 Hz  
 FIDRES 0.098042 Hz  
 AQ 5.0998478 sec  
 RG 22.6  
 DW 52.000 usec  
 DE 13.81 usec  
 TE 298.0 K  
 D1 0.10000000 sec  
 TD0 1

===== CHANNEL f1 =====  
 SF01 600.1342009 MHz  
 NUC1 1H  
 P1 11.50 usec  
 PLW1 20.00000000 W

F2 - Processing parameters  
 SI 65536  
 SF 600.1300343 MHz  
 WDW EM  
 SSB 0  
 LB 0.30 Hz  
 GB 0  
 PC 1.00

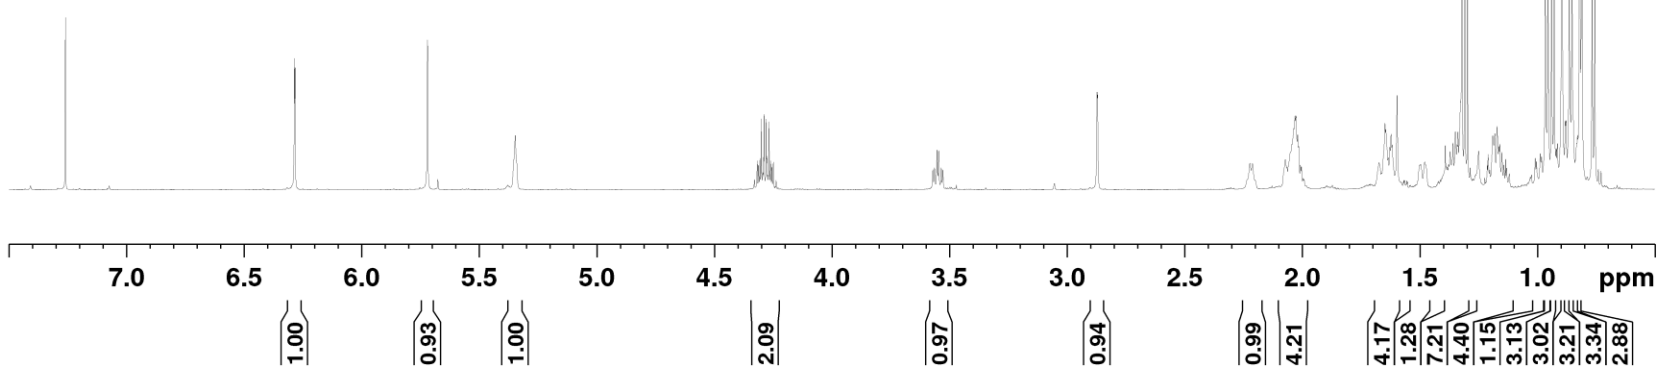



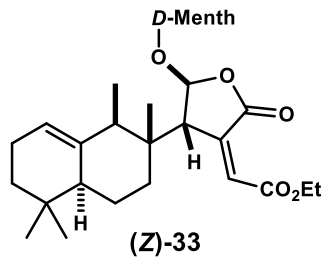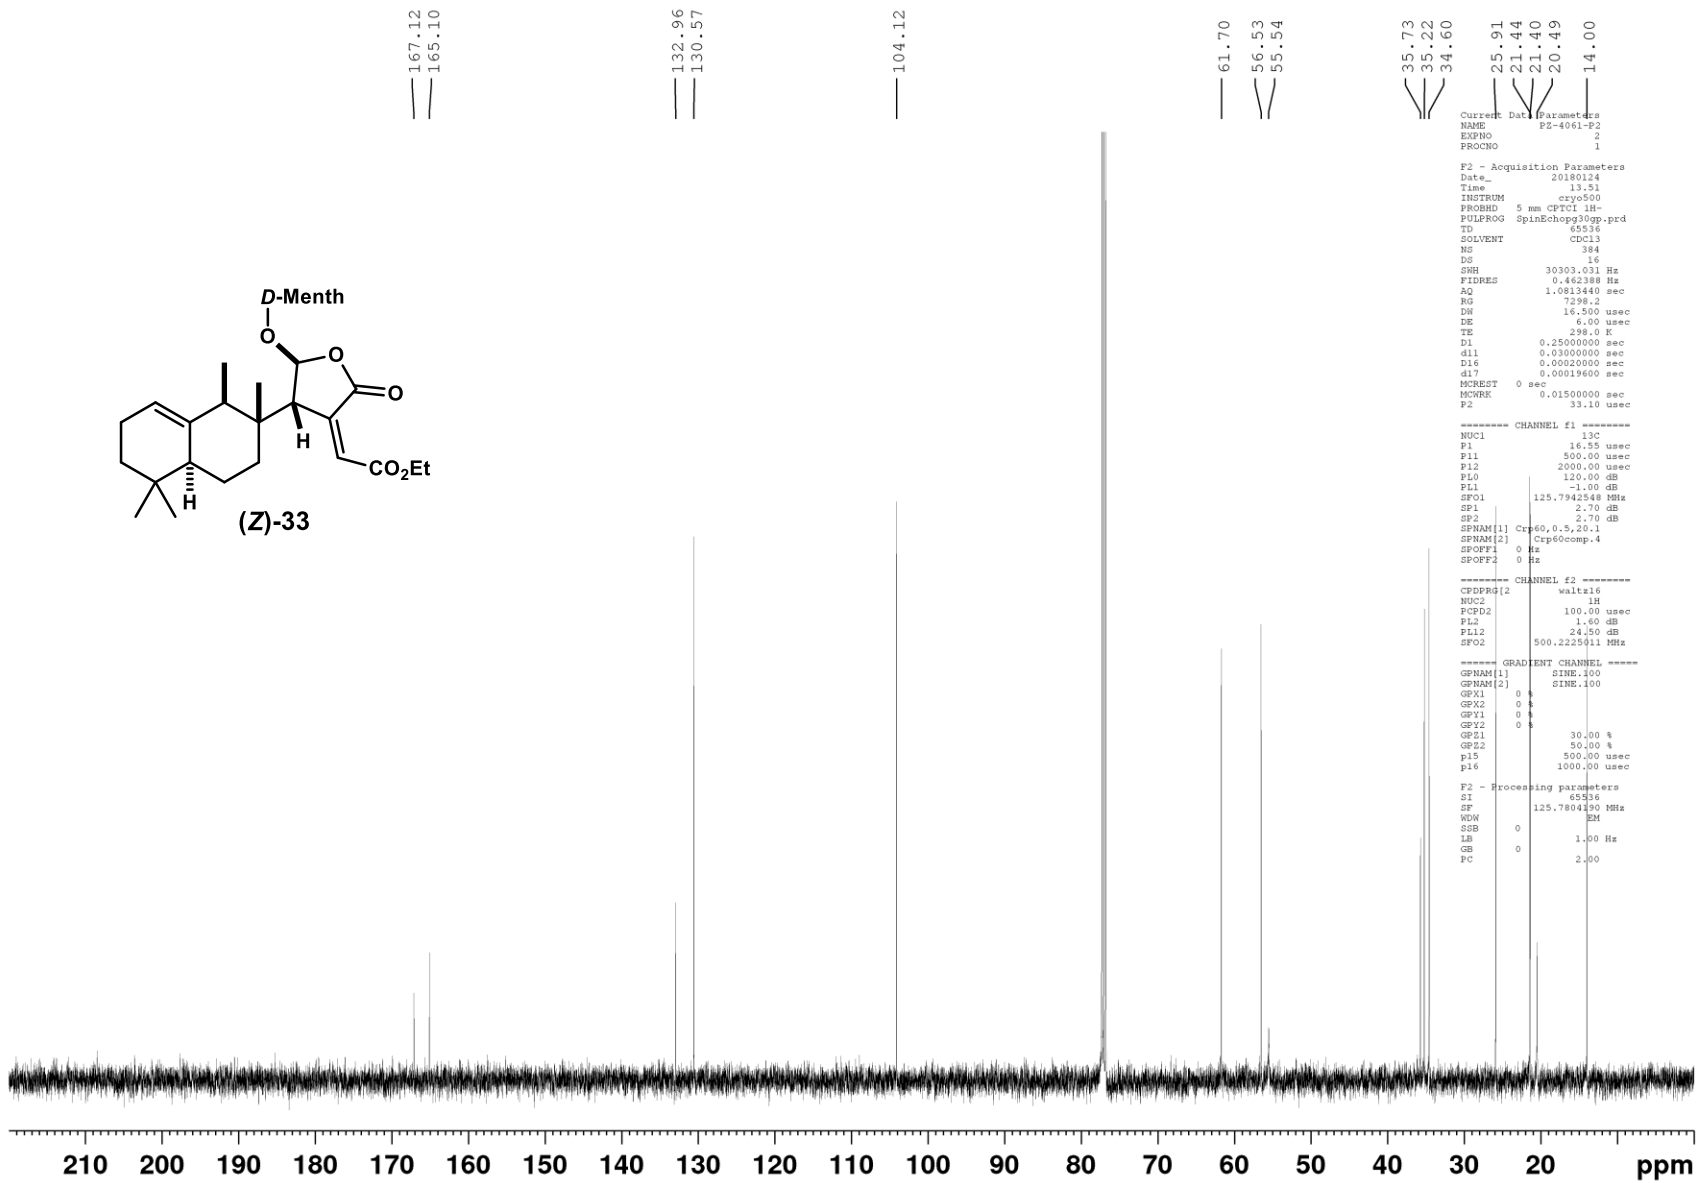

```

Current Date Parameters
NAME      F2-4061-F2
EXPNO    2
PROCNO    1

F2 - Acquisition Parameters
Date_     20180124
Time      13:51
INSTRUM   cryo500
PROBHD    5 mm CPCL1 1H-
PULPROG   SpinEchopg30pp-prd
TD         65536
SOLVENT   CDCl3
NS         384
DS         16
SWH        30303.031 Hz
FIDRES     0.462388 Hz
AQ         1.0813440 sec
RG         7298.2
DN         16.500 usec
DE         6.00 usec
TE         298.0 K
d11        0.25000000 sec
d111       0.03000000 sec
d16        0.00020000 sec
d17        0.00019600 sec
MCRET      0 sec
MCRNK      0.01500000 sec
F2         33.10 usec

----- CHANNEL f1 -----
NUC1       13C
P1         16.55 usec
P11        500.00 usec
P12        2000.00 usec
PL0        120.00 dB
PL1        -1.00 dB
SFO1       125.7942548 MHz
SP1        2.70 dB
SP2        2.70 dB
SFOFF1[1] Crp60.0.5.20.1
SFOFF1[2] Crp60comp.4
SFOFF2     0 Hz
SFOFF3     0 Hz

----- CHANNEL f2 -----
CPDPRG[2] waltz16
NUC2       1H
PCPD2      100.00 usec
PL2        1.60 dB
PL12       24.50 dB
SFO2       500.2225011 MHz

----- GRADIENT CHANNEL -----
GRNAM[1]   SINE.100
GRNAM[2]   SINE.100
GPX1       0 %
GPX2       0 %
GPY1       0 %
GPY2       0 %
GRZ1       30.00 %
GRZ2       50.00 %
p15        500.00 usec
p16        1000.00 usec

F2 - Processing parameters
SI         65536
SF         125.7804490 MHz
WDW        EM
SSB        0
LB         1.00 Hz
GB         0
PC         2.00

```

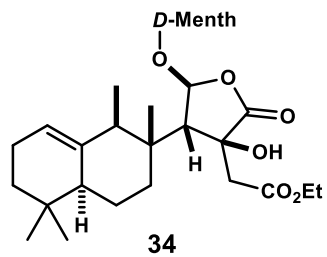

5.79  
5.78

5.34

4.79

4.22  
4.20  
4.19

3.62  
3.61  
3.60

2.90  
2.88  
2.79  
2.77  
2.70  
2.69  
2.33  
2.32  
2.20  
2.19  
2.17  
2.16  
2.14  
2.03  
1.66  
1.64  
1.60  
1.58  
1.54  
1.51  
1.49  
1.42  
1.40  
1.37  
1.36  
1.35  
1.34  
1.33  
1.29  
1.28  
1.27  
1.25  
1.23  
1.22  
1.19

Current Data Parameters  
NAME 2-112  
EXPNO 2  
PROCNO 1

F2 - Acquisition Parameters  
Date\_ 20190625  
Time 11.23  
INSTRUM av600  
PROBHD 5 mm CPBBO BB-  
PULPROG zg30  
TD 98074  
SOLVENT CDC13  
NS 48  
DS 2  
SWH 9615.385 Hz  
FIDRES 0.098042 Hz  
AQ 5.0998478 sec  
RG 10  
DW 52.000 usec  
DE 13.70 usec  
TE 298.0 K  
D1 0.10000000 sec  
TD0 1

===== CHANNEL f1 =====  
SF01 600.1342009 MHz  
NUC1 1H  
P1 12.00 usec  
PLW1 30.00000000 W

F2 - Processing parameters  
SI 65536  
SF 600.1300345 MHz  
WDW EM  
SSB 0  
LB 0.30 Hz  
GB 0  
PC 1.00

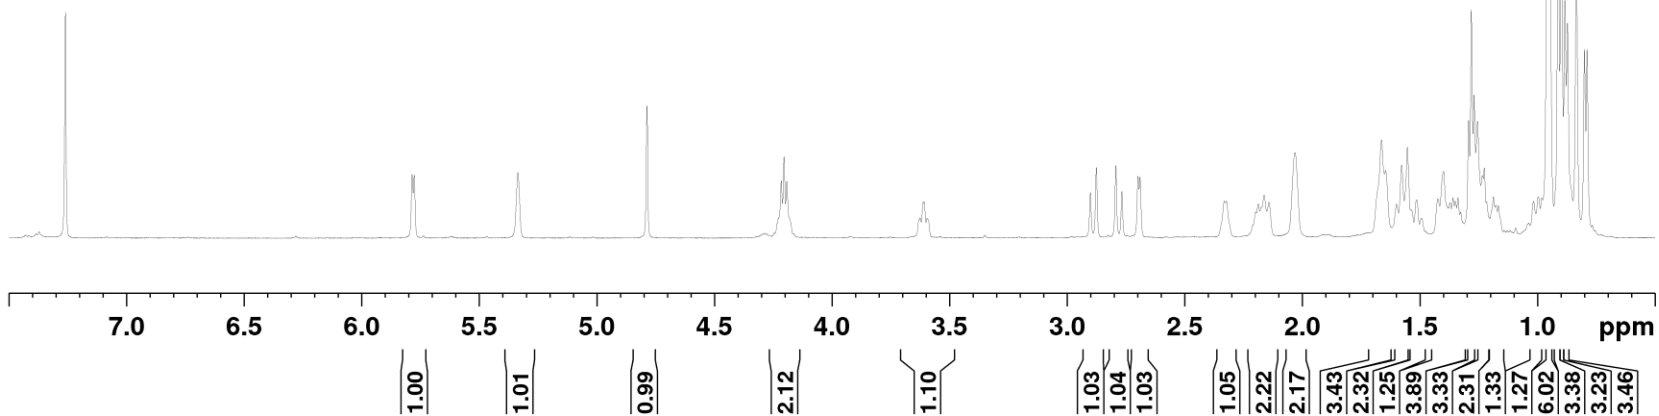

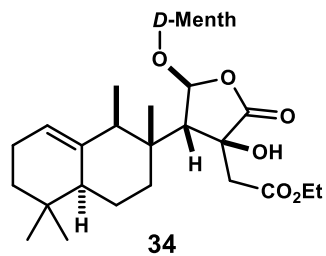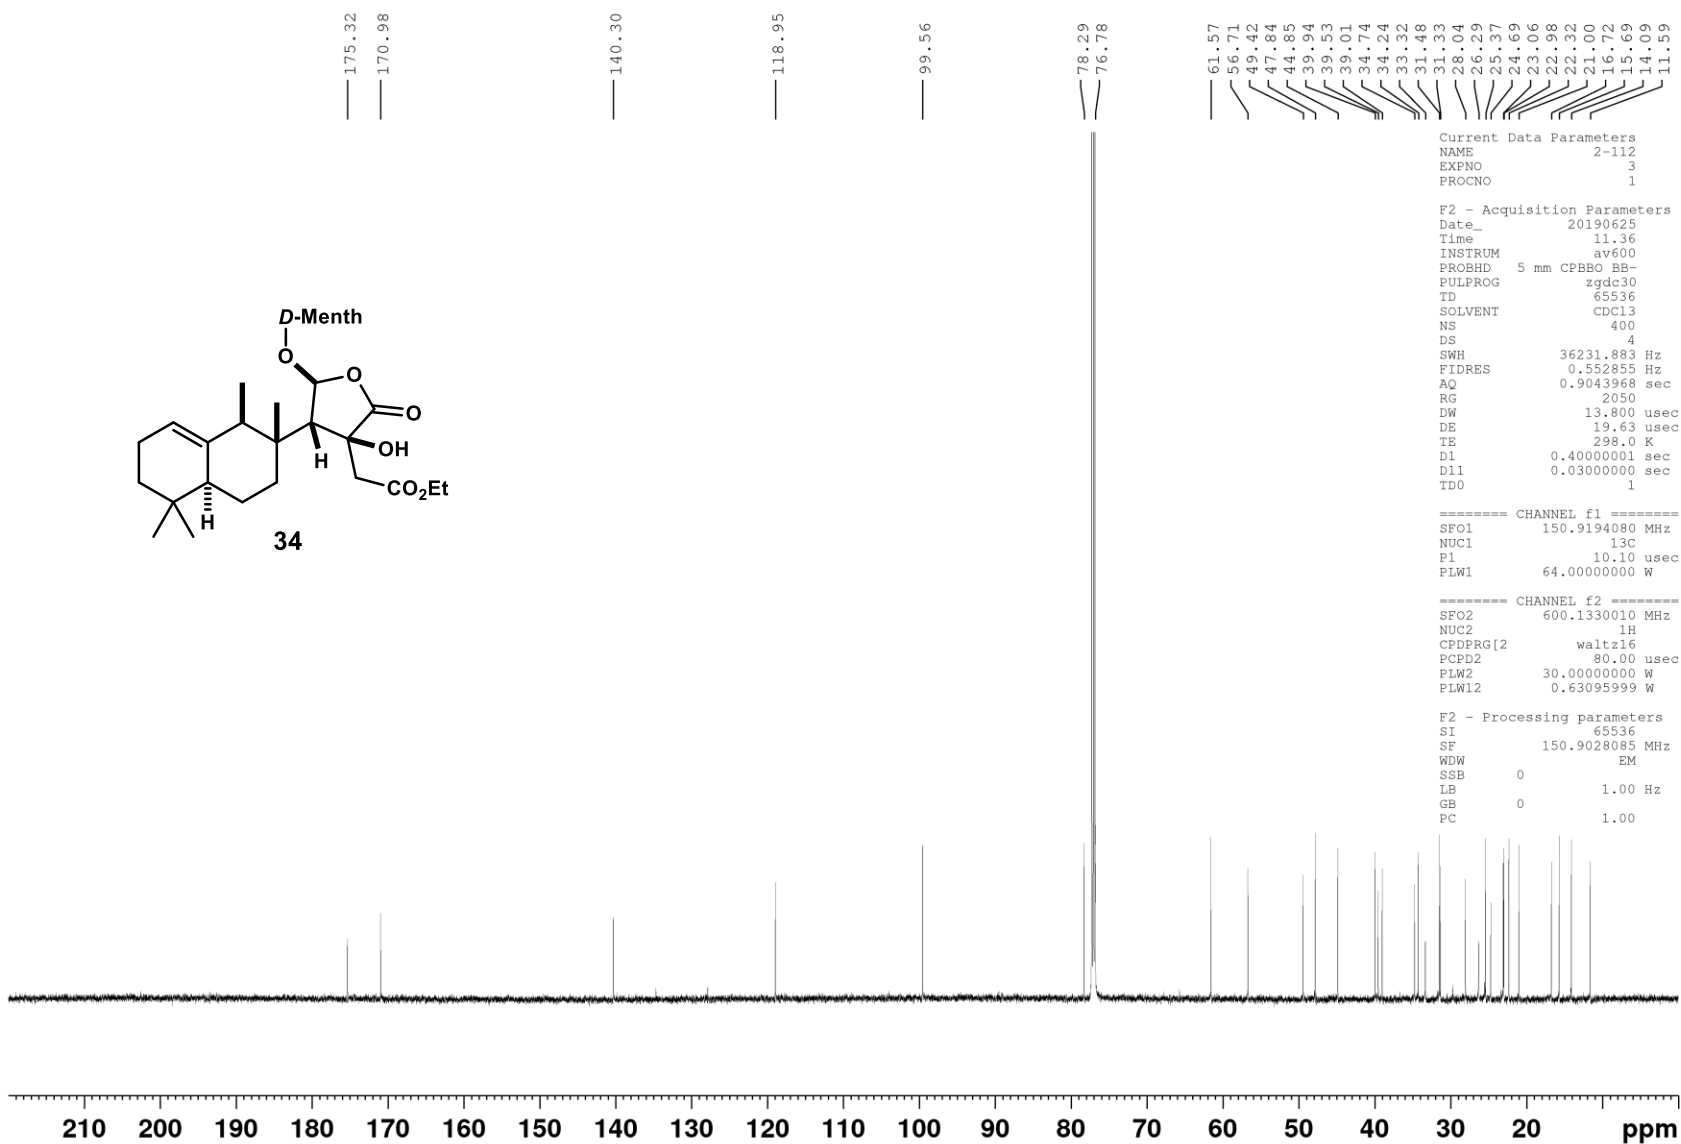

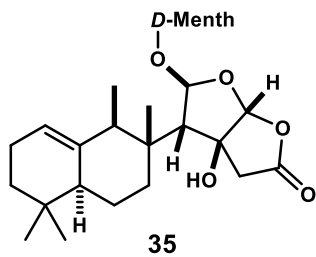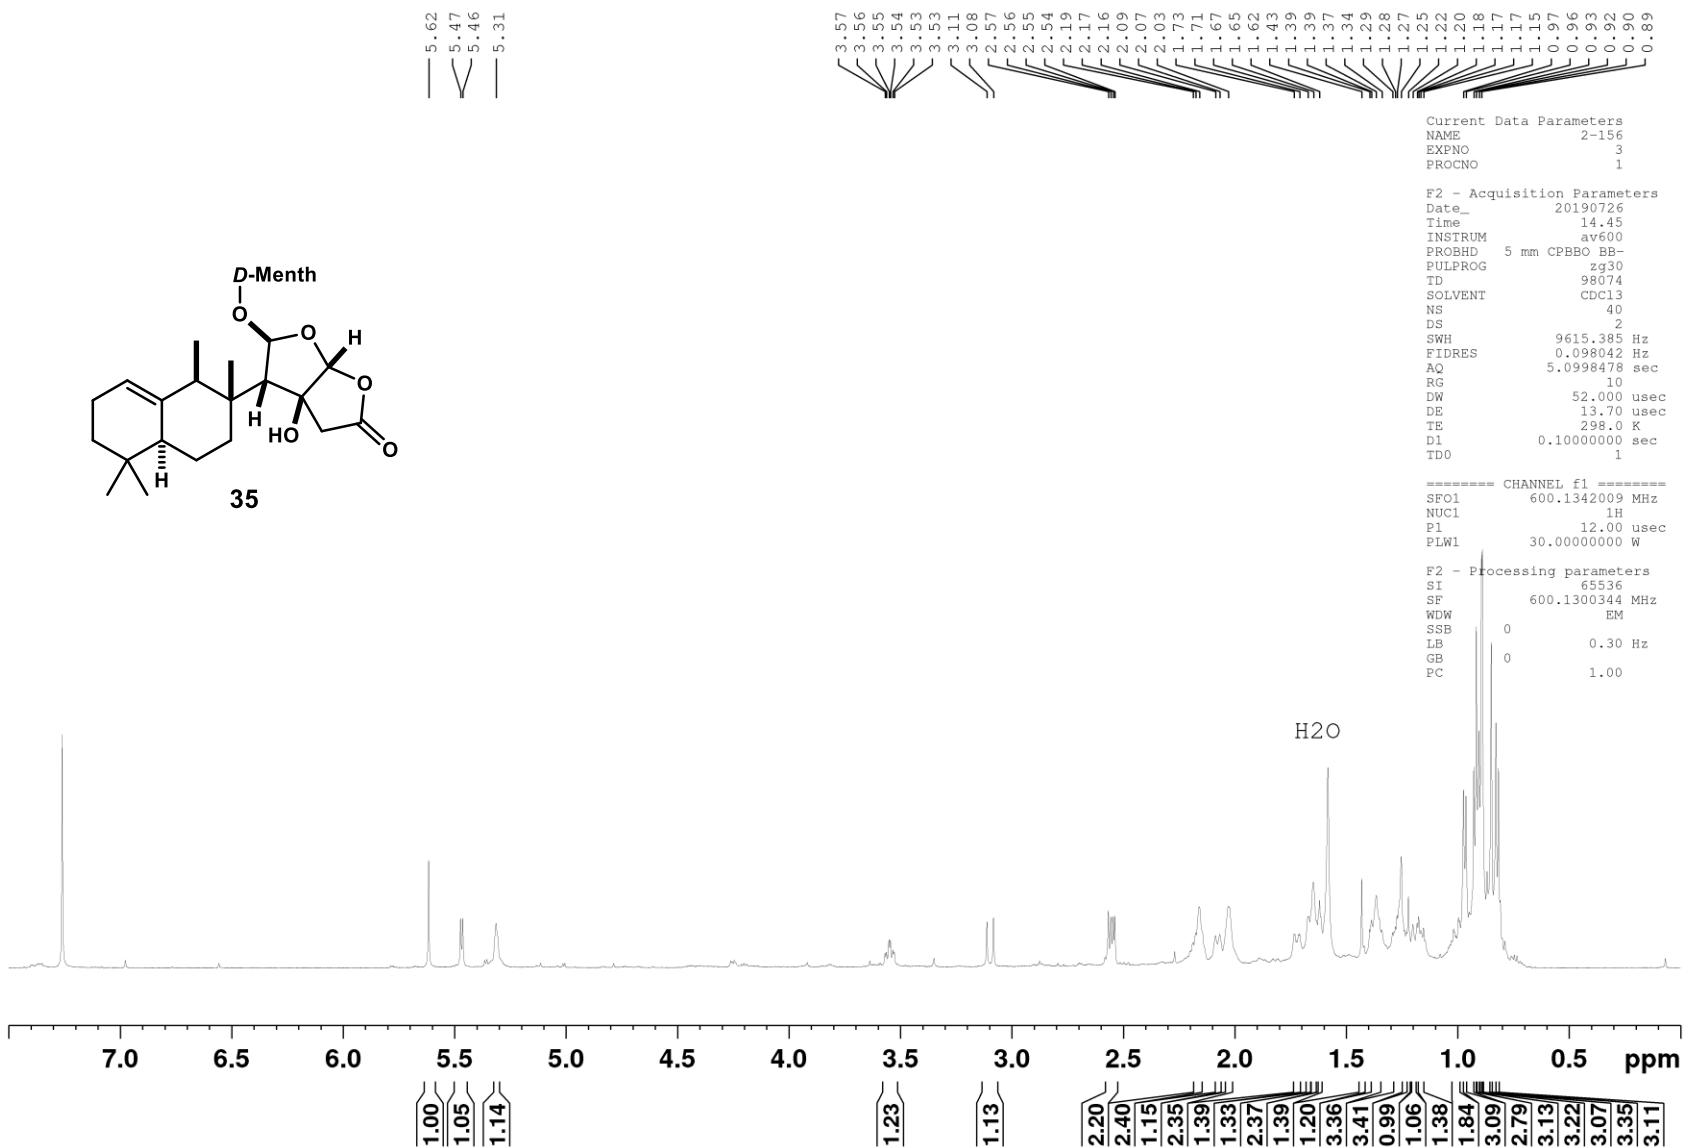

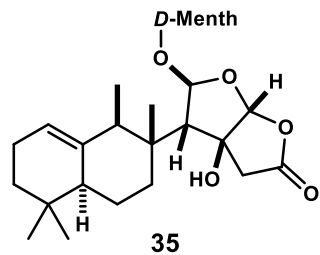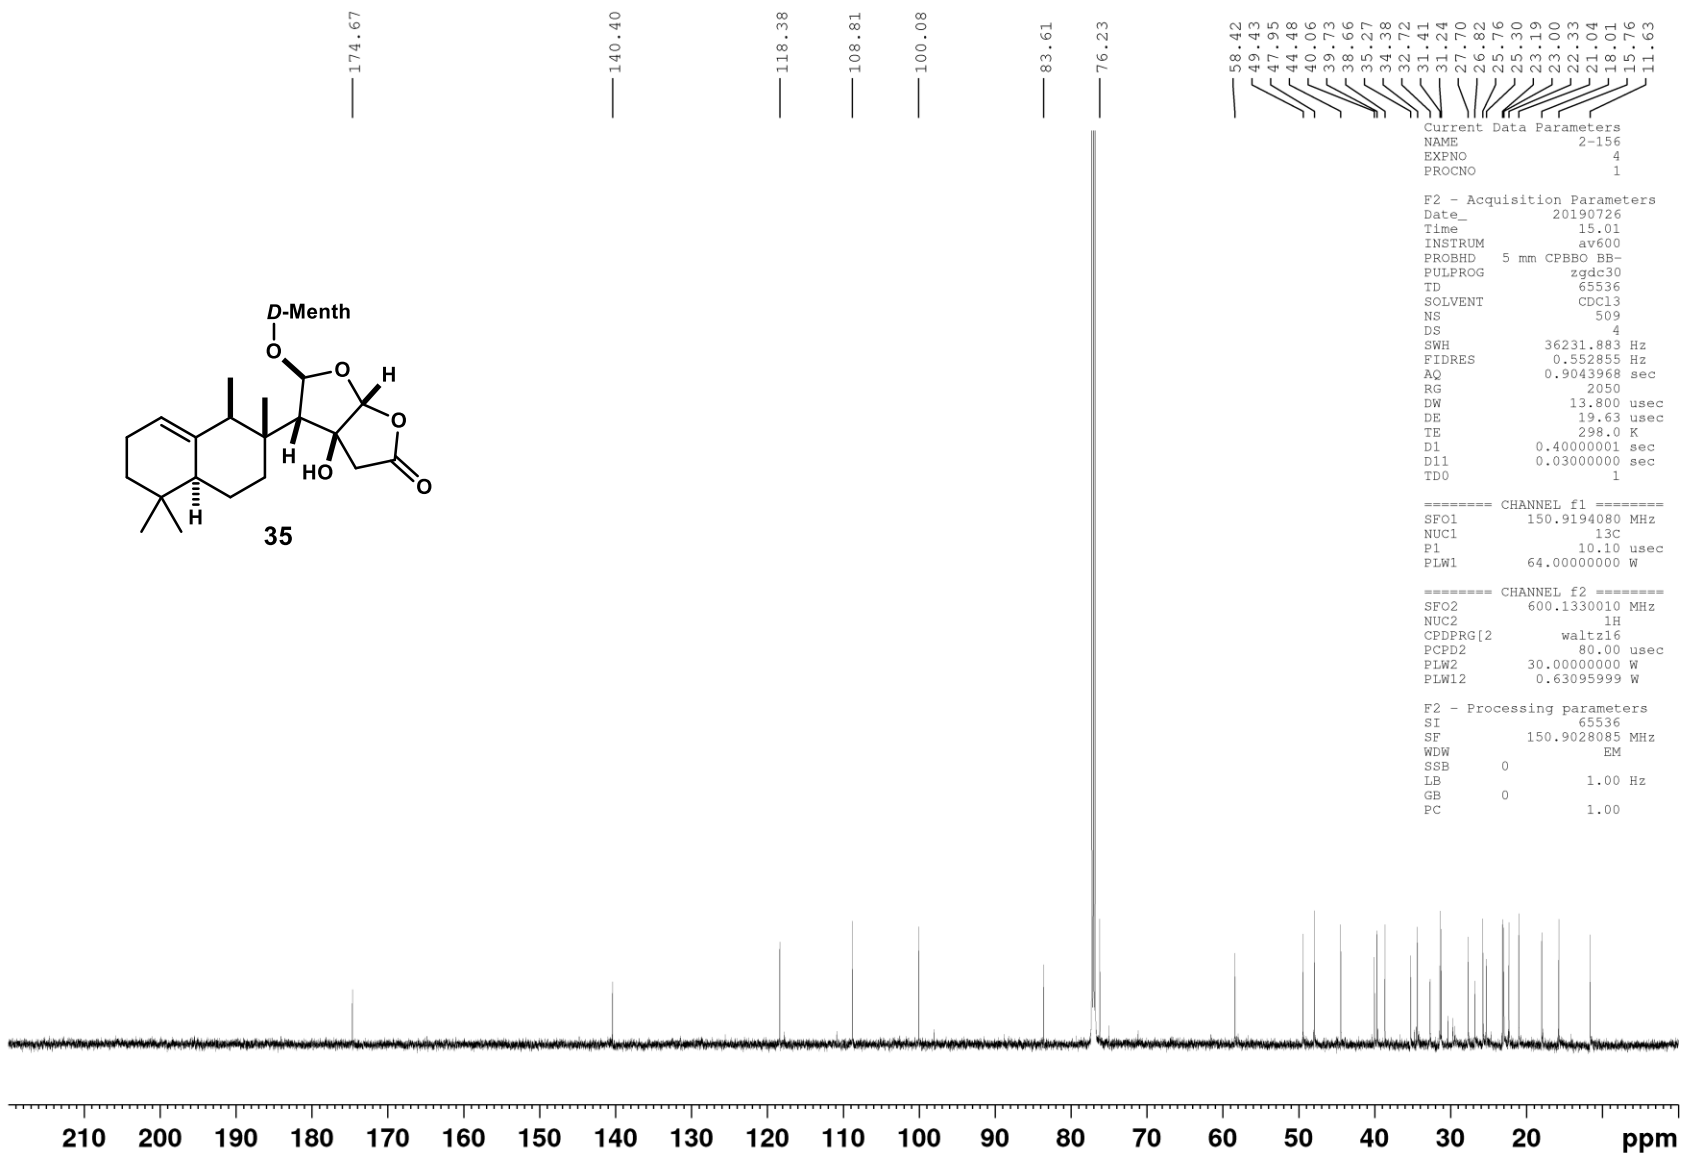

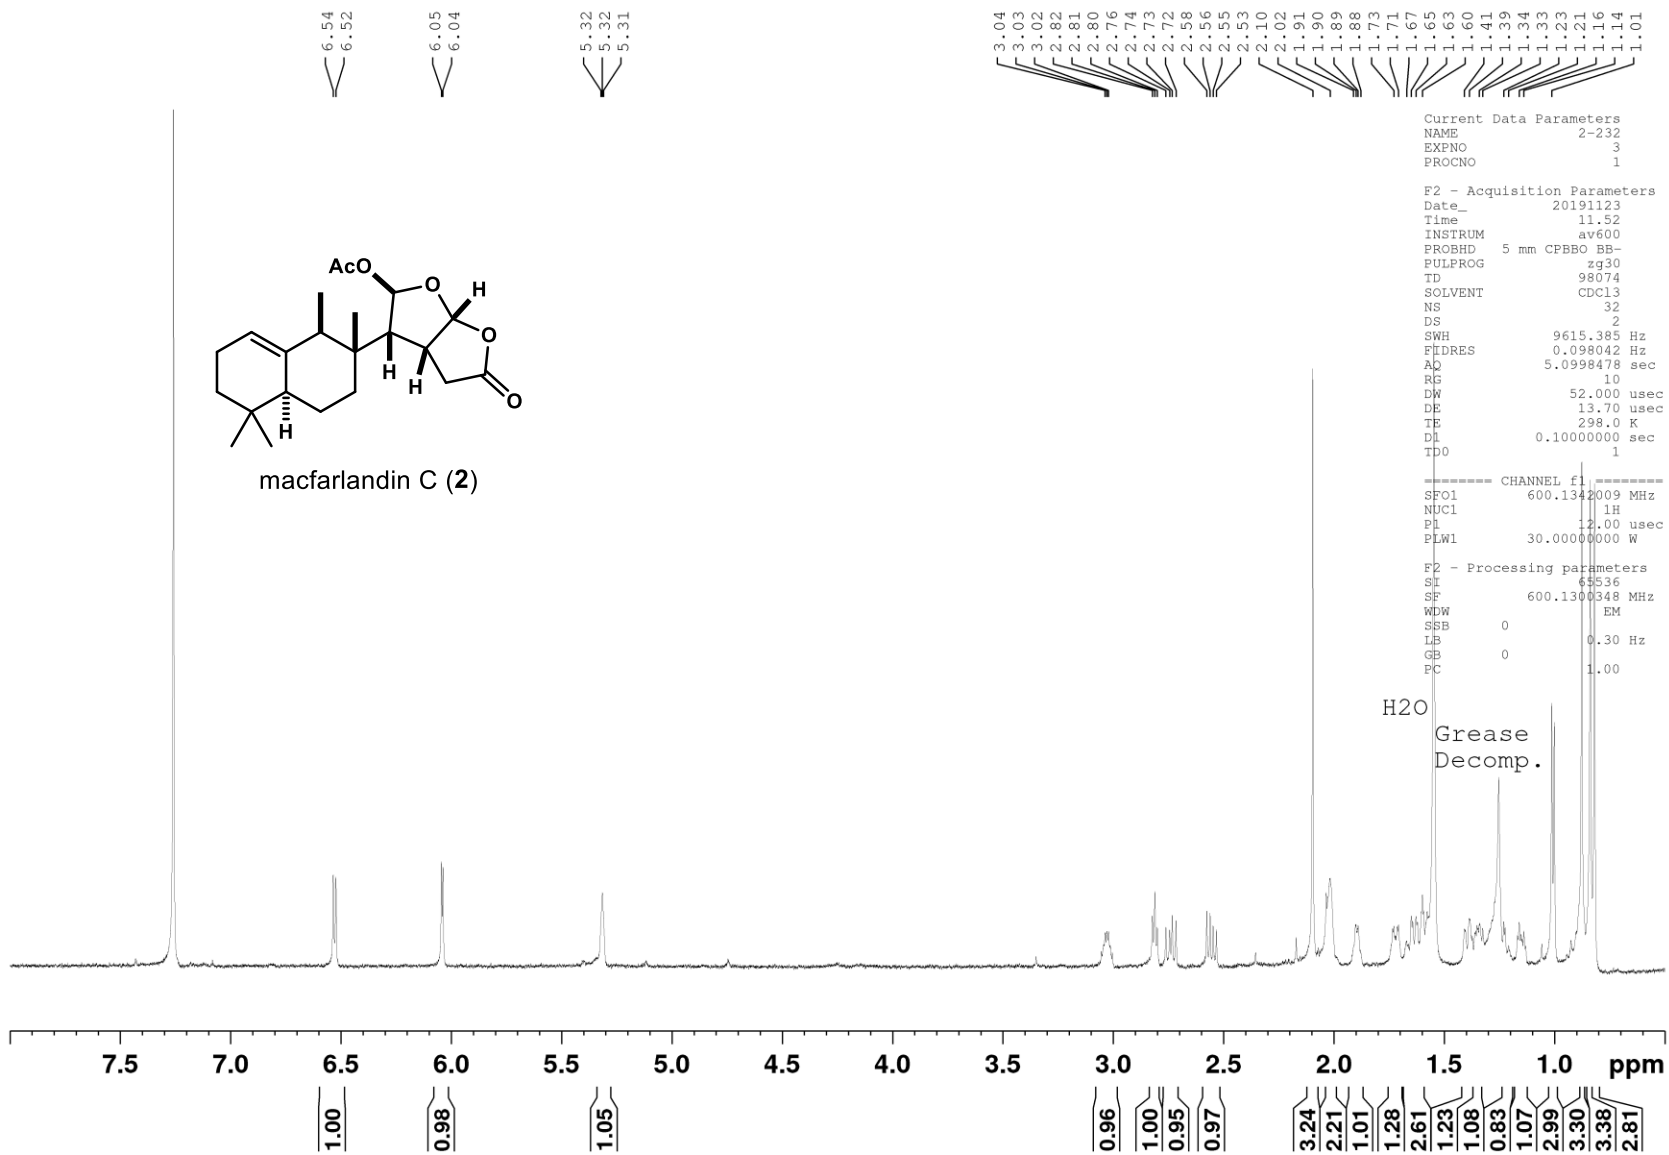

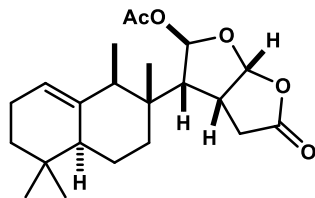

macfarlandin C (2)

— 175.39  
— 169.77

— 140.29

— 118.43

— 104.81

— 96.11

— 51.76  
— 49.02  
— 44.48  
— 42.17  
— 39.69  
— 35.47  
— 32.64  
— 31.23  
— 30.22  
— 27.64  
— 26.80  
— 25.19  
— 22.99  
— 21.17  
— 18.92  
— 11.57

Current Data Parameters  
NAME 2-232  
EXPNO 9  
PROCNO 1

F2 - Acquisition Parameters  
Date\_ 20191230  
Time 23.05  
INSTRUM av600  
PROBHD 5 mm CPBBO BB-  
PULPROG zgdc30  
TD 65536  
SOLVENT CDCl3  
NS 30000  
DS 4  
SWH 36231.883 Hz  
FIDRES 0.552855 Hz  
AQ 0.9043968 sec  
RG 2050  
DW 13.800 usec  
DE 19.63 usec  
TE 298.0 K  
D1 0.40000001 sec  
D11 0.03000000 sec  
TDO 1

===== CHANNEL f1 =====  
SFO1 150.9194080 MHz  
NUC1 13C  
P1 10.10 usec  
PLW1 64.00000000 W

===== CHANNEL f2 =====  
SFO2 600.1330010 MHz  
NUC2 1H  
CPDPRG[2] waltz16  
PCPD2 80.00 usec  
PLW2 30.00000000 W  
PLW12 0.63095999 W

F2 - Processing parameters  
SI 65536  
SF 150.9028085 MHz  
WDW no  
SSB 0  
LB 0 Hz  
GB 0  
PC 1.00

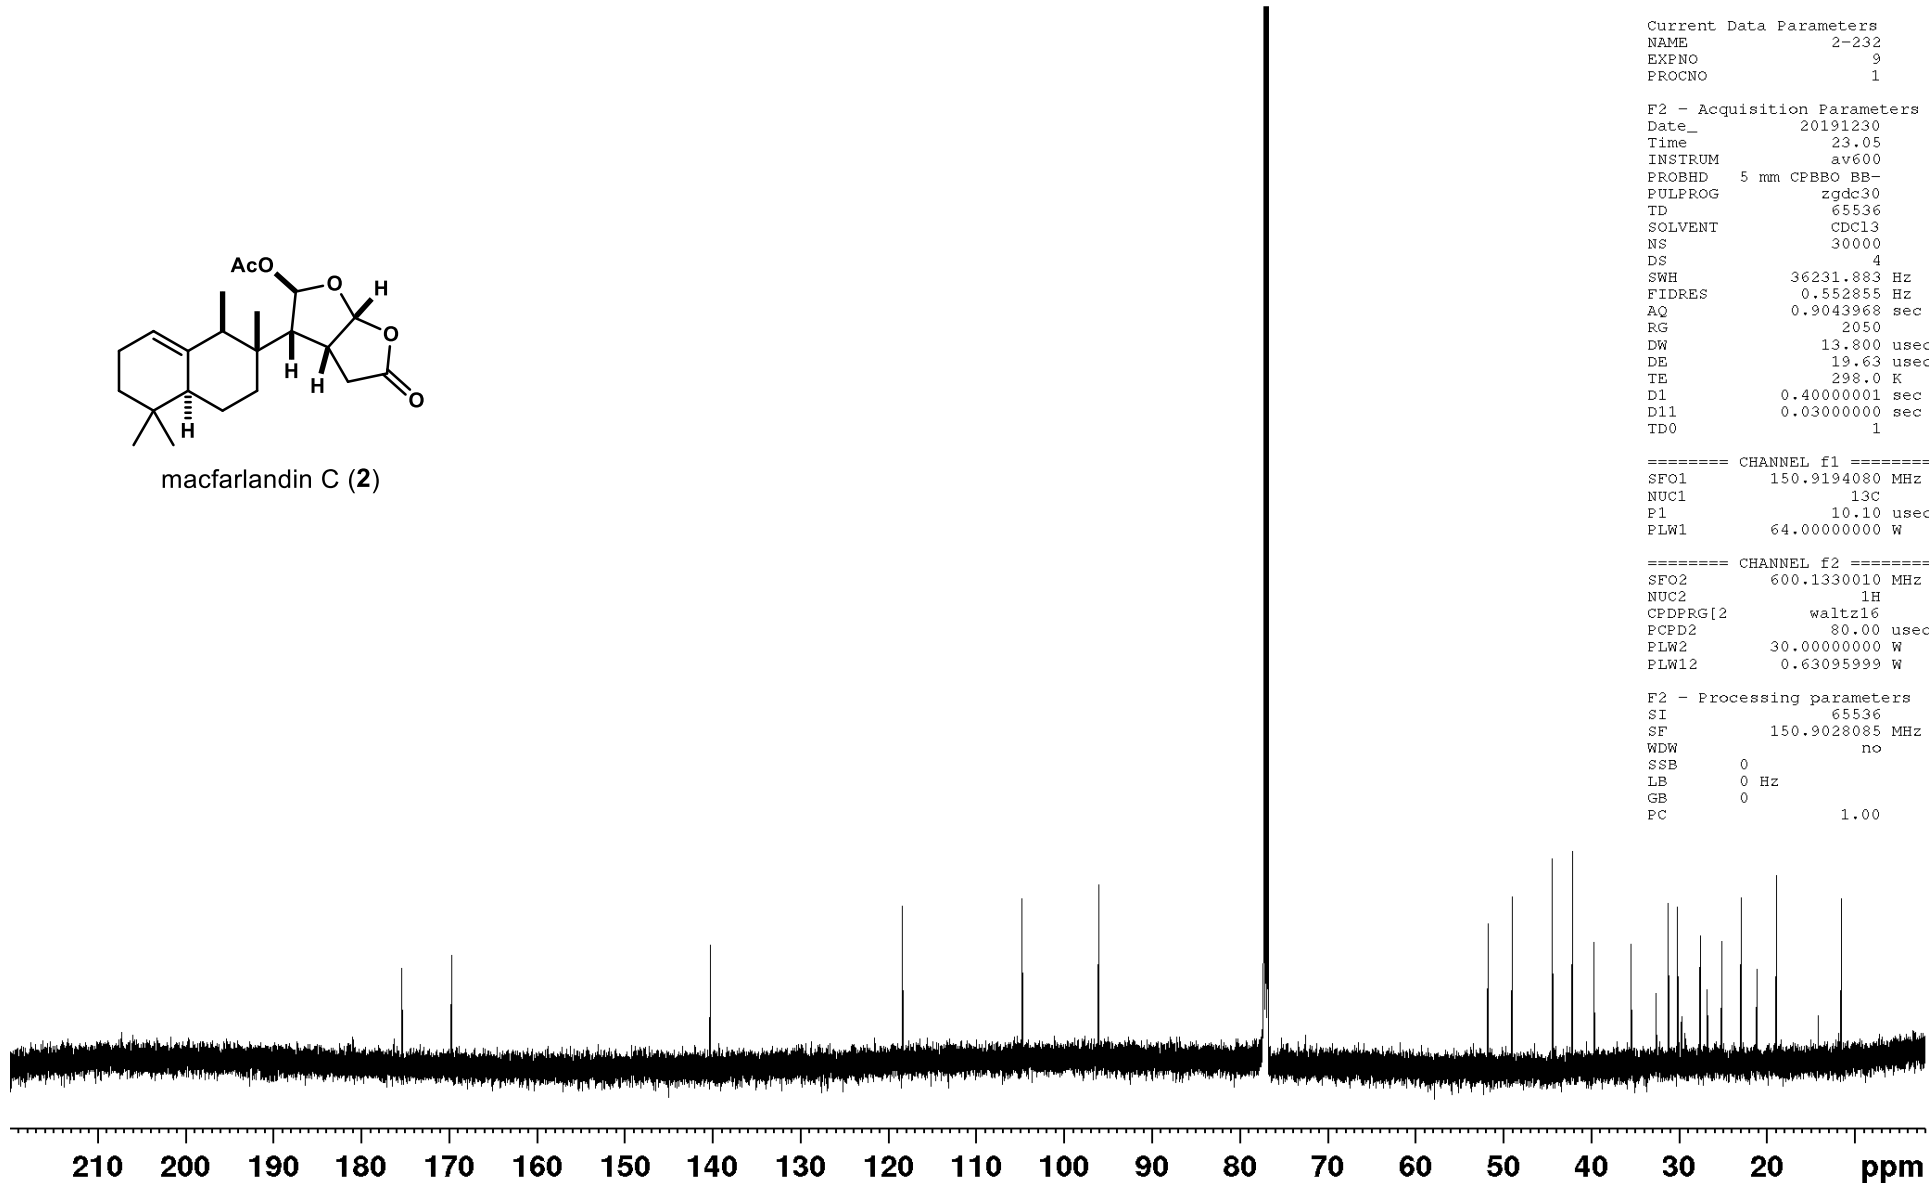

Supplement: NIHMS1552697-supplement-Supp_info.pdf [file NIHMS1552697-supplement-Supp_info.pdf]
